# Supplementary material for: Microfluidic reactors for advancing the MS analysis of fast biological responses
Source: PubMed Central journal article supplement (PMC6369226; doi:10.1038/s41378-019-0048-3), 2019-02-11

**SKBR3 cells in 10 mM  $\text{NH}_4\text{HCO}_3$  solution  
(shortly after removing the cells from PBS and introducing them in  $\text{NH}_4\text{HCO}_3$  solution)**

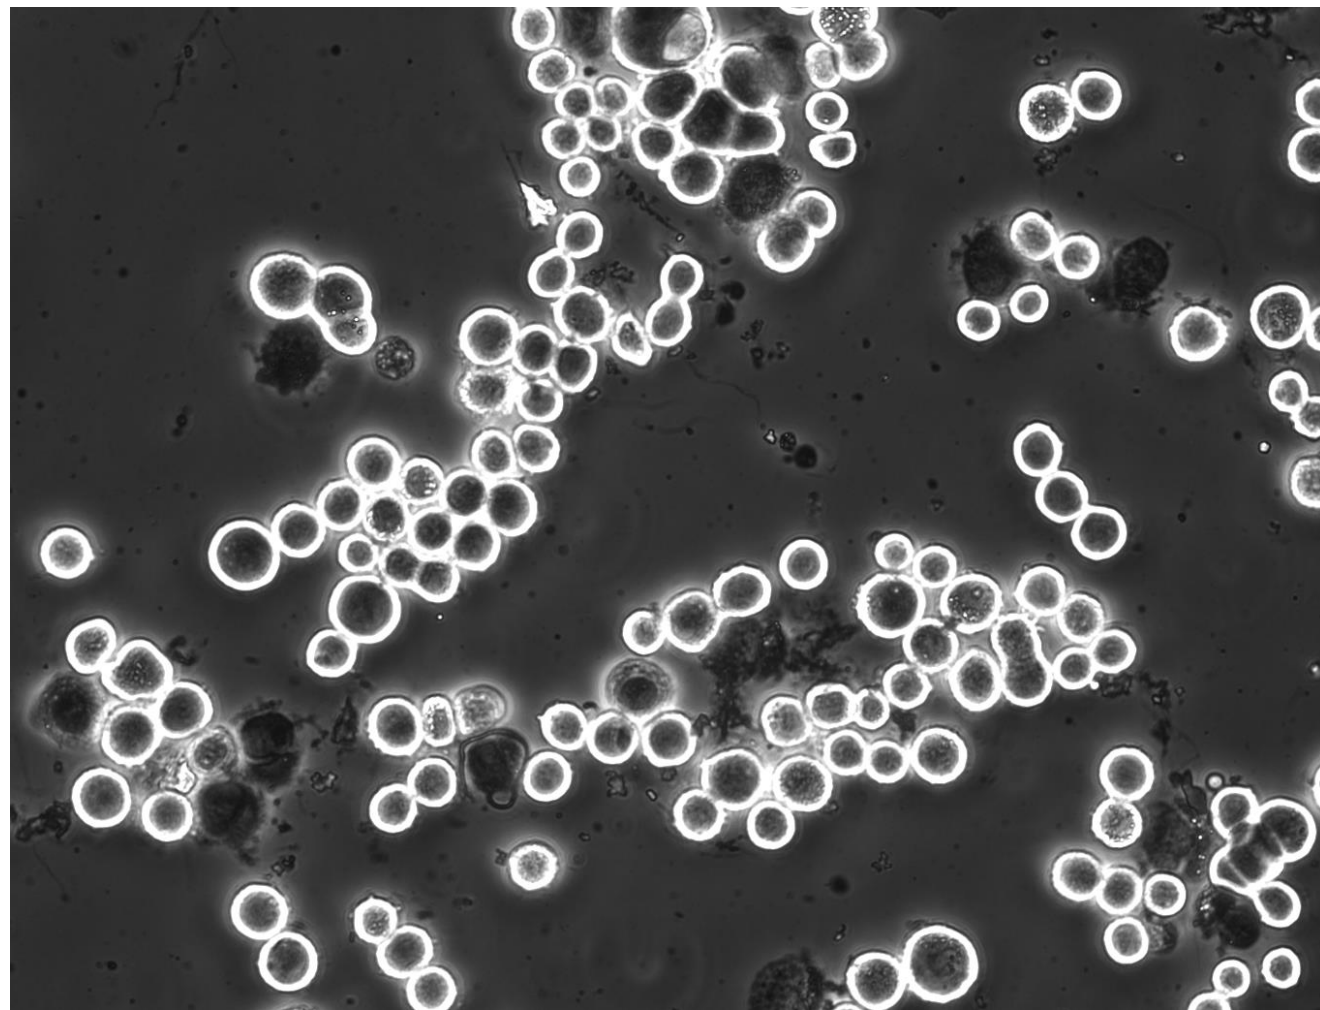

**SKBR3 cell sonic lysis in 10 mM NH<sub>4</sub>HCO<sub>3</sub> solution (1-2 min)**

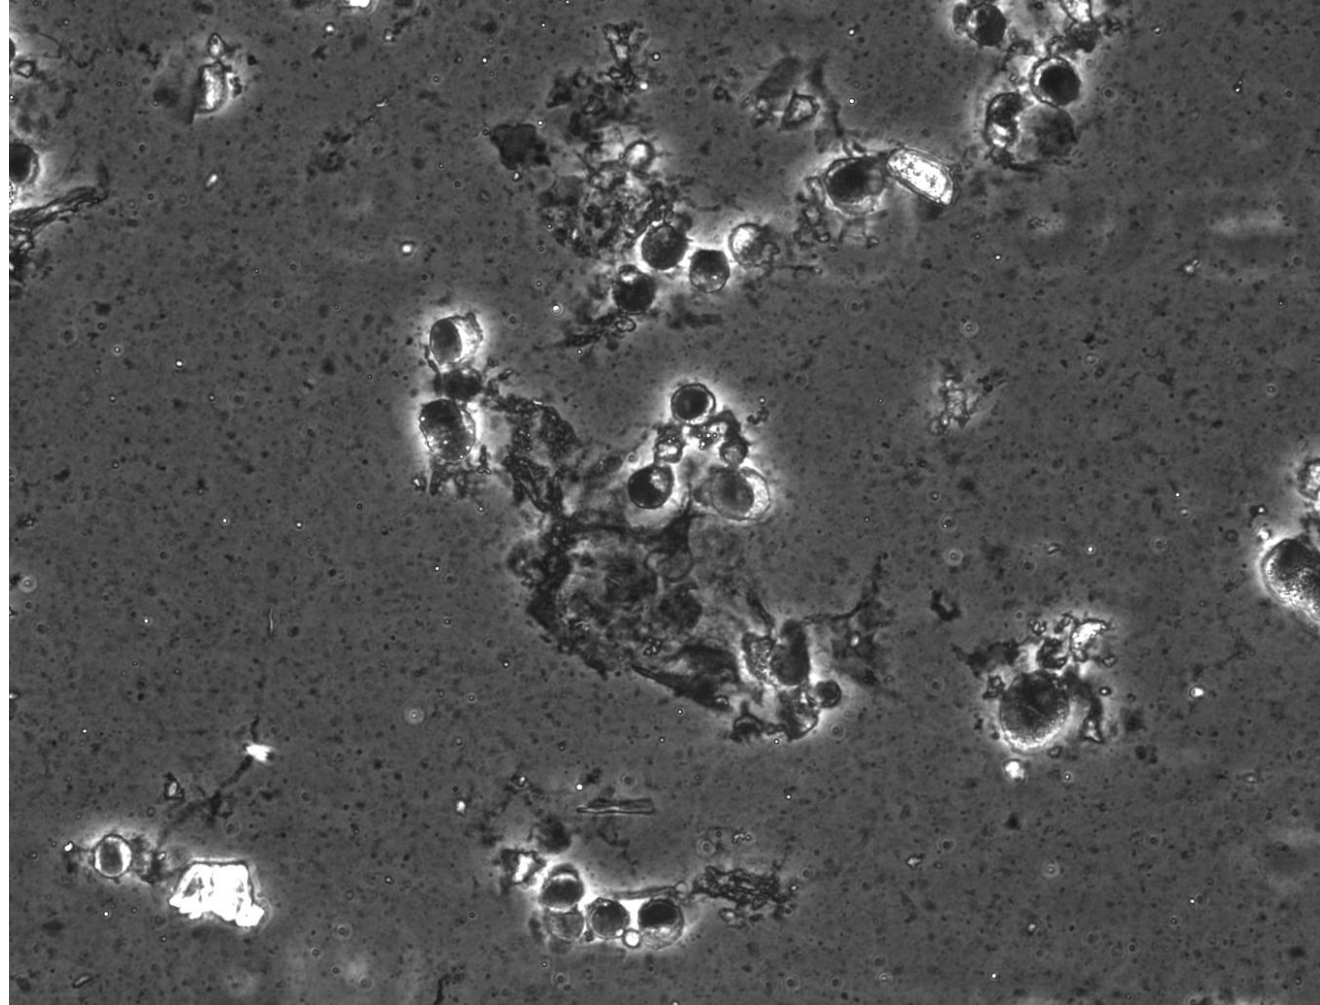

**SKBR3 cell sonic lysis in 10 mM  $\text{NH}_4\text{HCO}_3$  solution (2-3 min)**

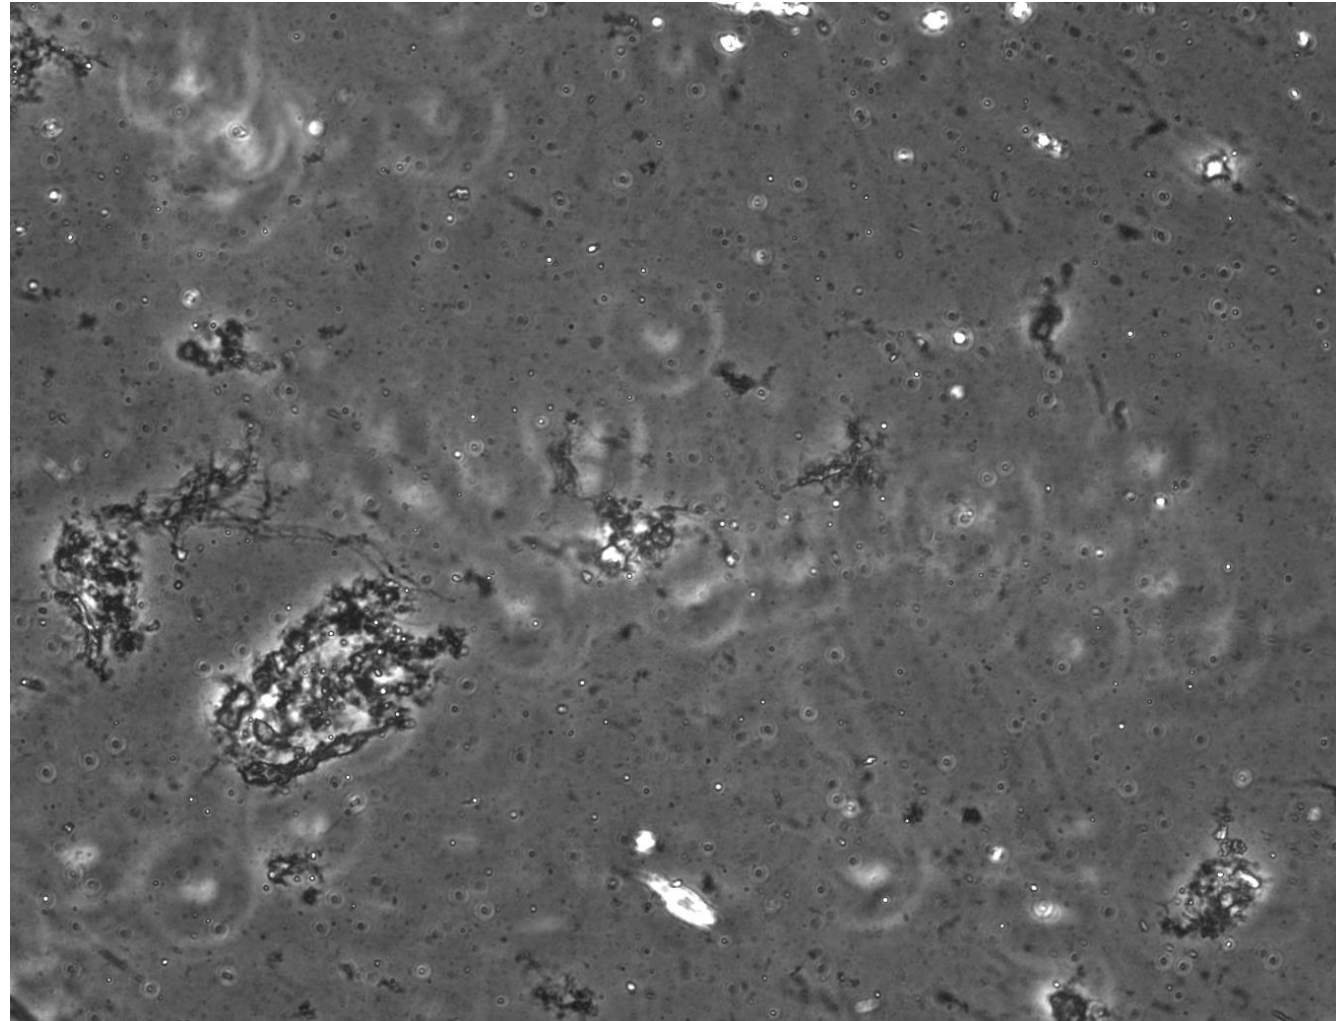

Supplement: 41378_2019_48_MOESM3_ESM.pdf [file 41378_2019_48_MOESM3_ESM.pdf]
