# Supplementary material for: Microfluidic reactors for advancing the MS analysis of fast biological responses
Source: PubMed Central journal article supplement (PMC6369226; doi:10.1038/s41378-019-0048-3), 2019-02-11
Supplement: 41378_2019_48_MOESM4_ESM.pdf [file 41378_2019_48_MOESM4_ESM.pdf]

| Accession | Description                                                       | Score A | Coverage A | # Peptides A | # PSM A | Score B | Coverage B | # Peptides B | # PSM B | Score C | Coverage C | # Peptides C | # PSM C |
|-----------|-------------------------------------------------------------------|---------|------------|--------------|---------|---------|------------|--------------|---------|---------|------------|--------------|---------|
| P05387    | 60S acidic ribosomal prot                                         | 35.67   | 69.57      | 4            | 7       | 30.65   | 59.13      | 3            | 6       | 15.23   | 16.52      | 1            | 3       |
| P01966    | Hemoglobin subunit alph                                           | 35.18   | 46.10      | 4            | 7       | 37.72   | 54.61      | 4            | 7       | 46.19   | 57.45      | 4            | 9       |
| P04406    | Glyceraldehyde-3-phosph                                           | 297.69  | 56.12      | 10           | 55      | 191.59  | 31.64      | 5            | 36      | 270.05  | 40.60      | 8            | 47      |
| P00921    | Carbonic anhydrase 2 - B                                          | 82.93   | 41.70      | 6            | 16      | 71.91   | 50.19      | 7            | 14      | 60.83   | 25.10      | 4            | 11      |
| P05787    | Keratin, type II cytoskele                                        | 92.33   | 45.76      | 13           | 18      | 93.42   | 39.13      | 11           | 17      | 145.80  | 39.96      | 11           | 27      |
| P02070    | Hemoglobin subunit beta                                           | 116.45  | 30.34      | 3            | 23      | 117.81  | 30.34      | 3            | 24      | 128.32  | 30.34      | 3            | 25      |
| P02662    | Alpha-S1-casein - Bos ta                                          | 73.62   | 45.79      | 5            | 14      | 46.37   | 35.51      | 3            | 9       | 32.94   | 22.43      | 3            | 7       |
| Q13268    | Dehydrogenase/reductas                                            | 52.47   | 32.86      | 4            | 11      | 65.49   | 33.21      | 4            | 14      | 99.83   | 33.21      | 4            | 21      |
| P06576    | ATP synthase subunit bet                                          | 64.31   | 37.05      | 11           | 13      | 61.41   | 34.03      | 10           | 13      | 39.64   | 17.39      | 6            | 8       |
| O43852    | Calumenin OS=Homo sap                                             | 29.77   | 35.24      | 5            | 6       | 25.09   | 28.89      | 4            | 5       | 20.62   | 15.56      | 2            | 4       |
| P06733    | Alpha-enolase OS=Homo                                             | 219.44  | 38.02      | 9            | 45      | 173.97  | 37.10      | 9            | 36      | 316.58  | 22.12      | 6            | 65      |
| P30086    | Phosphatidylethanolamin                                           | 9.50    | 24.60      | 2            | 2       | 18.00   | 14.97      | 3            | 4       | 16.25   | 35.29      | 3            | 3       |
| P60842    | Eukaryotic initiation facto                                       | 30.75   | 30.54      | 6            | 6       | 14.71   | 14.78      | 3            | 3       | 42.22   | 33.00      | 8            | 9       |
| Q15847    | Adipogenesis regulatory factor OS=Hc                              | 0.00    |            |              |         |         | 0.00       |              |         | 6.02    | 40.79      | 1            | 1       |
| Q8IU66    | Histone H2A type 2-B OS                                           | 11.10   | 40.00      | 2            | 2       | 5.49    | 17.69      | 1            | 1       | 5.62    | 17.69      | 1            | 1       |
| P21796    | Voltage-dependent anion                                           | 24.50   | 33.22      | 5            | 5       | 24.49   | 33.22      | 5            | 5       | 30.06   | 27.92      | 4            | 6       |
| Q9UK76    | Hematological and neuro                                           | 3.97    | 11.69      | 1            | 1       | 4.24    | 11.69      | 1            | 1       | 5.32    | 27.27      | 1            | 1       |
| P08727    | Keratin, type I cytoskelet                                        | 305.42  | 26.75      | 7            | 58      | 205.65  | 31.00      | 8            | 41      | 349.78  | 21.25      | 5            | 65      |
| P05783    | Keratin, type I cytoskelet                                        | 94.77   | 37.44      | 10           | 17      | 78.74   | 37.67      | 10           | 14      | 90.60   | 34.65      | 7            | 16      |
| P10809    | 60 kDa heat shock protei                                          | 89.71   | 37.35      | 12           | 17      | 73.92   | 29.32      | 9            | 13      | 99.89   | 32.11      | 11           | 18      |
| Q96KK5    | Histone H2A type 1-H OS                                           | 14.07   | 37.50      | 2            | 3       | 14.17   | 14.84      | 1            | 3       | 9.72    | 14.84      | 1            | 2       |
| P62158    | Calmodulin OS=Homo sa                                             | 24.46   | 36.91      | 4            | 5       | 13.07   | 34.23      | 3            | 3       | 14.11   | 36.91      | 3            | 3       |
| P22626    | Heterogeneous nuclear ri                                          | 29.75   | 19.83      | 4            | 6       | 39.57   | 36.26      | 6            | 8       | 37.31   | 24.08      | 4            | 8       |
| P55327    | Tumor protein D52 OS=F                                            | 38.94   | 36.16      | 6            | 8       | 40.73   | 29.02      | 4            | 8       | 18.52   | 29.02      | 3            | 4       |
| P11142    | Heat shock cognate 71 kl                                          | 36.97   | 23.53      | 8            | 8       | 34.02   | 13.62      | 5            | 7       | 79.47   | 26.78      | 8            | 15      |
| P23528    | Cofilin-1 OS=Homo sapie                                           | 42.02   | 35.54      | 4            | 8       | 23.71   | 35.54      | 4            | 5       | 42.66   | 35.54      | 4            | 8       |
| P12763    | Alpha-2-HS-glycoprotein                                           | 599.23  | 30.64      | 5            | 102     | 653.17  | 30.64      | 5            | 110     | 659.70  | 35.38      | 6            | 111     |
| O43707    | Alpha-actinin-4 OS=Homo                                           | 69.26   | 23.82      | 13           | 14      | 55.13   | 20.31      | 10           | 11      | 73.04   | 25.36      | 13           | 15      |
| O75223    | Gamma-glutamylcyclotra                                            | 14.32   | 21.28      | 2            | 3       | 9.61    | 22.87      | 2            | 2       | 8.93    | 21.28      | 2            | 2       |
| Q8WXC6    | Myeloma-overexpressed gene 2 protein OS=Homo sapiens GN=MYEOV2 PE | 4.14    |            |              |         | 4.14    | 35.09      | 1            | 1       | 4.19    | 35.09      | 1            | 1       |
| P04075    | Fructose-bisphosphate al                                          | 166.31  | 34.89      | 7            | 33      | 126.24  | 34.89      | 7            | 26      | 141.40  | 24.73      | 4            | 27      |
| P07437    | Tubulin beta chain OS=H                                           | 44.31   | 29.05      | 7            | 9       | 36.04   | 25.90      | 6            | 7       | 42.08   | 22.97      | 5            | 8       |
| P04264    | Keratin, type II cytoskele                                        | 26.34   | 12.58      | 6            | 6       | 56.09   | 24.07      | 10           | 12      | 42.36   | 25.00      | 8            | 9       |
| P68371    | Tubulin beta-4B chain OS                                          | 24.65   | 19.10      | 5            | 5       | 36.34   | 28.54      | 6            | 7       | 36.19   | 16.85      | 4            | 7       |
| P08758    | Annexin A5 OS=Homo sa                                             | 27.11   | 26.25      | 5            | 6       | 24.13   | 21.56      | 4            | 5       | 20.61   | 17.50      | 3            | 4       |
| P0CW22    | 40S ribosomal protein S1                                          | 9.87    | 32.59      | 2            | 2       | 5.04    | 16.30      | 1            | 1       | 19.70   | 32.59      | 2            | 4       |
| P16152    | Carbonyl reductase [NAD                                           | 24.14   | 21.30      | 4            | 5       | 19.76   | 21.30      | 4            | 4       | 21.19   | 28.16      | 4            | 4       |
| P14618    | Pyruvate kinase PKM OS=                                           | 81.12   | 29.38      | 10           | 17      | 43.95   | 13.94      | 4            | 9       | 66.03   | 26.93      | 10           | 14      |

|        |                                      |        |       |    |     |        |       |    |     |        |       |   |    |
|--------|--------------------------------------|--------|-------|----|-----|--------|-------|----|-----|--------|-------|---|----|
| P68363 | Tubulin alpha-1B chain O             | 49.87  | 23.95 | 6  | 10  | 44.74  | 23.95 | 6  | 9   | 56.97  | 32.15 | 8 | 12 |
| Q13011 | Delta(3,5)-Delta(2,4)-dier           | 10.31  | 12.80 | 2  | 2   | 13.75  | 19.51 | 3  | 3   | 20.84  | 25.30 | 4 | 4  |
| P62894 | Cytochrome c - Bos tauru             | 19.63  | 30.77 | 2  | 4   | 5.30   | 16.35 | 1  | 1   | 8.53   | 30.77 | 2 | 2  |
| P31937 | 3-hydroxyisobutyrate def             | 22.93  | 26.19 | 5  | 5   | 14.21  | 14.88 | 3  | 3   | 13.85  | 15.77 | 3 | 3  |
| P07737 | Profilin-1 OS=Homo sapi              | 17.54  | 20.00 | 2  | 4   | 12.80  | 31.43 | 3  | 3   | 23.01  | 20.00 | 2 | 5  |
| P04792 | Heat shock protein beta-             | 18.81  | 31.22 | 4  | 4   | 19.28  | 31.22 | 4  | 4   | 14.86  | 31.22 | 3 | 3  |
| P06703 | Protein S100-A6 OS=Hon               | 9.98   | 31.11 | 2  | 2   |        | 0.00  |    |     |        | 0.00  |   |    |
| P68036 | Ubiquitin-conjugating enz            | 6.27   | 16.23 | 1  | 1   | 10.65  | 16.23 | 1  | 2   | 10.10  | 30.52 | 2 | 2  |
| P07237 | Protein disulfide-isomerase          | 39.29  | 28.15 | 6  | 8   | 32.17  | 13.78 | 4  | 7   | 43.12  | 26.97 | 6 | 8  |
| P78371 | T-complex protein 1 subu             | 49.58  | 26.73 | 10 | 10  | 56.03  | 25.98 | 9  | 11  | 44.77  | 23.93 | 8 | 9  |
| P31946 | 14-3-3 protein beta/alpha            | 26.13  | 21.14 | 3  | 5   | 29.61  | 21.14 | 3  | 6   | 9.87   | 16.67 | 2 | 2  |
| P20674 | Cytochrome c oxidase sul             | 9.60   | 30.00 | 2  | 2   |        | 0.00  |    |     | 4.24   | 10.00 | 1 | 1  |
| P29401 | Transketolase OS=Homo                | 38.07  | 23.92 | 7  | 8   | 43.80  | 18.14 | 5  | 8   | 42.63  | 22.15 | 5 | 7  |
| O95994 | Anterior gradient protein            | 19.43  | 29.71 | 3  | 4   | 8.98   | 20.00 | 2  | 2   | 5.12   | 9.71  | 1 | 1  |
| P51858 | Hepatoma-derived growth              | 15.91  | 29.58 | 3  | 3   | 16.57  | 18.33 | 3  | 3   | 20.77  | 18.33 | 4 | 4  |
| P26599 | Polypyrimidine tract-bind            | 19.76  | 17.14 | 4  | 4   | 15.48  | 13.18 | 3  | 3   | 11.55  | 11.68 | 2 | 2  |
| P37802 | Transgelin-2 OS=Homo s               | 8.71   | 16.08 | 2  | 2   | 13.83  | 22.11 | 3  | 3   | 13.77  | 22.11 | 3 | 3  |
| P09211 | Glutathione S-transferase            | 16.38  | 20.00 | 2  | 3   | 21.46  | 29.05 | 3  | 4   | 6.53   | 9.05  | 1 | 1  |
| P35527 | Keratin, type I cytoskelet           | 28.79  | 17.82 | 4  | 5   | 50.45  | 26.48 | 6  | 9   | 31.79  | 13.96 | 4 | 6  |
| P67809 | Nuclease-sensitive eleme             | 18.15  | 9.88  | 2  | 4   | 14.97  | 18.21 | 3  | 3   | 28.39  | 29.01 | 5 | 6  |
| O14548 | Cytochrome c oxidase subunit 7A-rela |        | 0.00  |    |     | 5.43   | 28.95 | 1  | 1   |        | 0.00  |   |    |
| P62841 | 40S ribosomal protein S1             | 11.62  | 28.28 | 2  | 2   | 10.23  | 13.10 | 1  | 2   | 5.02   | 13.10 | 1 | 1  |
| P08865 | 40S ribosomal protein SA             | 14.22  | 17.97 | 3  | 3   | 18.80  | 15.93 | 3  | 4   | 16.84  | 13.56 | 2 | 3  |
| Q16698 | 2,4-dienoyl-CoA reductas             | 18.86  | 23.58 | 4  | 4   | 12.69  | 16.12 | 3  | 3   | 19.68  | 15.82 | 4 | 4  |
| P02769 | Serum albumin - Bos tau              | 535.66 | 24.88 | 12 | 122 | 525.64 | 20.76 | 10 | 118 | 424.37 | 18.29 | 8 | 94 |
| P61204 | ADP-ribosylation factor 3            | 24.15  | 27.62 | 3  | 5   | 8.14   | 17.68 | 2  | 2   | 4.56   | 7.73  | 1 | 1  |
| P47755 | F-actin-capping protein si           | 10.83  | 14.69 | 2  | 2   | 14.07  | 18.53 | 3  | 3   | 4.19   | 5.59  | 1 | 1  |
| Q02790 | Peptidyl-prolyl cis-trans is         | 37.69  | 20.26 | 5  | 8   | 27.87  | 24.18 | 6  | 6   | 20.78  | 17.43 | 4 | 4  |
| P61978 | Heterogeneous nuclear ri             | 39.99  | 18.14 | 5  | 8   | 29.99  | 15.33 | 4  | 6   | 46.12  | 24.19 | 6 | 9  |
| P60709 | Actin, cytoplasmic 1 OS=             | 114.87 | 27.20 | 6  | 23  | 65.17  | 18.93 | 4  | 13  | 149.20 | 27.20 | 6 | 29 |
| Q9UL46 | Proteasome activator con             | 30.46  | 27.20 | 4  | 6   | 20.47  | 27.20 | 4  | 4   | 25.95  | 21.34 | 3 | 5  |
| Q15181 | Inorganic pyrophosphata              | 24.74  | 20.42 | 4  | 5   | 18.19  | 13.15 | 3  | 4   | 30.59  | 21.45 | 4 | 6  |
| P61106 | Ras-related protein Rab-J            | 13.01  | 26.98 | 3  | 3   |        | 0.00  |    |     |        | 0.00  |   |    |
| P38646 | Stress-70 protein, mitoch            | 57.72  | 20.32 | 10 | 13  | 45.95  | 16.35 | 8  | 10  | 47.10  | 16.35 | 7 | 10 |
| Q9Y316 | Protein MEMO1 OS=Hom                 | 13.34  | 16.50 | 3  | 3   | 4.84   | 6.40  | 1  | 1   | 13.81  | 22.56 | 3 | 3  |
| Q13228 | Selenium-binding protein             | 24.54  | 19.07 | 5  | 6   | 21.57  | 9.11  | 3  | 5   | 18.03  | 12.29 | 4 | 4  |
| Q16881 | Thioredoxin reductase 1,             | 35.52  | 15.72 | 6  | 7   | 17.67  | 11.86 | 3  | 3   | 25.82  | 13.71 | 5 | 5  |
| P62081 | 40S ribosomal protein S7             | 11.10  | 26.80 | 2  | 2   | 4.61   | 11.34 | 1  | 1   | 5.90   | 11.34 | 1 | 1  |
| P27348 | 14-3-3 protein theta OS=             | 30.58  | 26.53 | 6  | 6   | 34.72  | 21.63 | 5  | 7   | 9.91   | 13.47 | 2 | 2  |

|        |                                          |       |       |    |    |       |       |    |    |       |       |   |    |
|--------|------------------------------------------|-------|-------|----|----|-------|-------|----|----|-------|-------|---|----|
| P20339 | Ras-related protein Rab-5                | 8.80  | 15.35 | 2  | 2  |       | 0.00  |    |    | 9.20  | 17.67 | 2 | 2  |
| P50151 | Guanine nucleotide-binding protein G(i)  | 0.00  |       |    |    | 4.40  | 26.47 | 1  | 1  |       | 0.00  |   |    |
| P51148 | Ras-related protein Rab-5                | 16.53 | 26.39 | 3  | 3  | 21.24 | 26.39 | 3  | 4  | 15.25 | 26.39 | 3 | 3  |
| O60361 | Putative nucleoside diphosphate kinase 1 | 25.66 | 26.28 | 2  | 5  | 15.95 | 13.87 | 1  | 3  | 10.99 | 13.87 | 1 | 2  |
| O00264 | Membrane-associated protein 1            | 9.38  | 26.15 | 2  | 2  | 4.63  | 10.26 | 1  | 1  | 5.22  | 10.26 | 1 | 1  |
| Q9NS69 | Mitochondrial import receptor subunit 1  | 3.86  | 8.45  | 1  | 1  | 12.74 | 17.61 | 1  | 2  | 5.47  | 17.61 | 1 | 1  |
| Q9H0U4 | Ras-related protein Rab-1                | 13.47 | 17.41 | 2  | 3  | 23.86 | 25.87 | 3  | 5  | 17.49 | 25.87 | 3 | 4  |
| P21266 | Glutathione S-transferase theta 1        | 13.68 | 19.56 | 3  | 3  | 4.47  | 6.67  | 1  | 1  | 8.71  | 12.00 | 2 | 2  |
| P02655 | Apolipoprotein C-II OS=Homo sapiens      | 0.00  |       |    |    |       |       |    |    | 5.24  | 25.74 | 1 | 1  |
| P50395 | Rab GDP dissociation inhibitor 1         | 41.49 | 21.12 | 6  | 8  | 35.96 | 21.12 | 6  | 7  | 30.03 | 13.26 | 5 | 6  |
| P09972 | Fructose-bisphosphate aldolase B         | 51.95 | 19.51 | 5  | 10 | 21.12 | 10.71 | 2  | 4  | 34.17 | 17.03 | 4 | 7  |
| P61604 | 10 kDa heat shock protein                | 9.19  | 25.49 | 2  | 2  | 9.39  | 13.73 | 1  | 2  | 4.76  | 13.73 | 1 | 1  |
| P00167 | Cytochrome b5 OS=Homo sapiens            | 9.00  | 25.37 | 2  | 2  | 10.58 | 15.67 | 1  | 2  | 5.75  | 15.67 | 1 | 1  |
| P62820 | Ras-related protein Rab-1                | 22.67 | 25.37 | 3  | 5  | 23.50 | 25.37 | 3  | 5  | 22.17 | 25.37 | 3 | 5  |
| P63104 | 14-3-3 protein zeta/delta                | 17.22 | 19.59 | 3  | 3  | 35.28 | 20.82 | 3  | 7  | 21.87 | 15.10 | 2 | 4  |
| P08133 | Annexin A6 OS=Homo sapiens               | 26.94 | 13.52 | 6  | 6  | 38.12 | 18.28 | 7  | 8  | 33.95 | 17.09 | 6 | 7  |
| P14927 | Cytochrome b-c1 complex subunit 1        | 3.83  | 13.51 | 1  | 1  |       | 0.00  |    |    | 9.37  | 25.23 | 2 | 2  |
| Q13404 | Ubiquitin-conjugating enzyme E2          | 4.37  | 10.88 | 1  | 1  | 4.23  | 14.29 | 1  | 1  |       | 0.00  |   |    |
| Q12905 | Interleukin enhancer-binding protein 1   | 14.15 | 18.21 | 3  | 3  | 14.35 | 20.00 | 3  | 3  | 24.99 | 20.00 | 3 | 5  |
| P09110 | 3-ketoacyl-CoA thiolase, mitochondrial   | 12.82 | 15.09 | 3  | 3  | 20.27 | 20.05 | 4  | 4  | 25.29 | 25.00 | 5 | 5  |
| Q16836 | Hydroxyacyl-coenzyme A oxidoreductase    | 6.88  | 9.55  | 1  | 1  | 21.04 | 24.84 | 3  | 4  |       | 0.00  |   |    |
| P06744 | Glucose-6-phosphate isomerase            | 39.87 | 15.95 | 5  | 8  | 27.74 | 16.49 | 5  | 6  | 24.65 | 14.52 | 5 | 5  |
| P40926 | Malate dehydrogenase, mitochondrial      | 39.07 | 24.56 | 5  | 8  | 54.81 | 24.56 | 5  | 11 | 52.96 | 24.56 | 5 | 10 |
| P0CG06 | Ig lambda-3 chain C region               | 4.85  | 24.53 | 1  | 1  |       | 0.00  |    |    |       | 0.00  |   |    |
| P52943 | Cysteine-rich protein 2 OS=Homo sapiens  | 0.00  |       |    |    | 6.99  | 15.38 | 1  | 1  | 11.63 | 24.52 | 2 | 2  |
| Q9Y2V2 | Calcium-regulated heat stable protein 1  | 0.00  |       |    |    |       | 0.00  |    |    | 5.84  | 24.49 | 1 | 1  |
| P11021 | 78 kDa glucose-regulated protein         | 49.50 | 20.34 | 8  | 10 | 59.38 | 17.28 | 8  | 12 | 29.15 | 9.79  | 5 | 6  |
| Q9UKY7 | Protein CDV3 homolog OS=Homo sapiens     | 11.28 | 24.42 | 2  | 2  | 12.03 | 18.99 | 1  | 2  |       | 0.00  |   |    |
| Q9Y5U9 | Immediate early response protein 1       | 4.68  | 24.39 | 1  | 1  |       | 0.00  |    |    |       |       |   |    |
| Q96QR8 | Transcriptional activator protein 1      | 9.40  | 14.10 | 2  | 2  | 6.36  | 9.94  | 1  | 1  | 12.05 | 20.19 | 2 | 2  |
| P24752 | Acetyl-CoA acetyltransferase             | 20.08 | 17.56 | 4  | 4  | 19.37 | 18.03 | 4  | 4  | 4.61  | 3.04  | 1 | 1  |
| Q9UNZ2 | NSFL1 cofactor p47 OS=Homo sapiens       | 9.39  | 10.54 | 2  | 2  | 13.30 | 15.41 | 3  | 3  | 9.52  | 10.81 | 2 | 2  |
| P28070 | Proteasome subunit beta 5                | 16.41 | 24.24 | 3  | 3  | 14.59 | 15.15 | 2  | 3  | 11.02 | 16.67 | 2 | 2  |
| P27797 | Calreticulin OS=Homo sapiens             | 19.98 | 23.98 | 4  | 4  | 9.40  | 10.31 | 2  | 2  | 13.94 | 17.27 | 3 | 3  |
| P00558 | Phosphoglycerate kinase                  | 39.29 | 24.22 | 6  | 8  | 32.97 | 17.27 | 4  | 6  | 39.89 | 17.27 | 4 | 8  |
| P22314 | Ubiquitin-like modifier-activator 1      | 51.36 | 16.82 | 10 | 11 | 47.62 | 17.77 | 10 | 10 | 50.28 | 16.16 | 9 | 10 |
| Q99714 | 3-hydroxyacyl-CoA dehydrogenase          | 10.81 | 16.48 | 2  | 2  | 16.18 | 16.48 | 2  | 3  | 12.02 | 16.48 | 2 | 2  |
| P25705 | ATP synthase subunit alpha               | 32.87 | 17.90 | 6  | 7  | 31.90 | 21.70 | 7  | 7  | 28.77 | 16.46 | 5 | 6  |
| P40939 | Trifunctional enzyme subunit 1           | 26.35 | 12.71 | 5  | 6  | 21.58 | 9.96  | 5  | 5  | 38.31 | 13.50 | 6 | 8  |

|        |                                     |        |       |    |    |        |       |    |    |        |       |    |    |
|--------|-------------------------------------|--------|-------|----|----|--------|-------|----|----|--------|-------|----|----|
| P17987 | T-complex protein 1 subu            | 28.96  | 17.09 | 5  | 6  | 25.43  | 13.13 | 4  | 5  | 30.34  | 16.37 | 5  | 6  |
| P15531 | Nucleoside diphosphate k            | 9.62   | 23.68 | 2  | 2  |        | 0.00  |    |    |        | 0.00  |    |    |
| P25713 | Metallothionein-3 OS=Homo sapiens C | 0.00   |       |    |    | 3.94   | 23.53 | 1  | 1  |        | 0.00  |    |    |
| Q13185 | Chromobox protein homc              | 8.66   | 15.85 | 2  | 2  | 9.46   | 16.39 | 2  | 2  | 15.35  | 23.50 | 3  | 3  |
| Q13405 | 39S ribosomal protein L4            | 9.34   | 16.27 | 2  | 2  | 13.76  | 23.49 | 3  | 3  | 4.93   | 7.83  | 1  | 1  |
| P42765 | 3-ketoacyl-CoA thiolase, l          | 9.22   | 11.08 | 2  | 2  | 4.85   | 7.05  | 1  | 1  | 4.98   | 5.04  | 1  | 1  |
| P62258 | 14-3-3 protein epsilon OS           | 14.84  | 23.14 | 3  | 3  | 5.22   | 7.45  | 1  | 1  | 17.01  | 14.90 | 2  | 3  |
| Q13263 | Transcription intermediar           | 33.30  | 13.77 | 6  | 7  | 19.95  | 12.57 | 4  | 4  | 19.69  | 10.90 | 4  | 4  |
| P05388 | 60S acidic ribosomal prot           | 23.34  | 23.03 | 4  | 5  | 10.75  | 9.78  | 1  | 2  | 17.09  | 15.14 | 2  | 3  |
| P07355 | Annexin A2 OS=Homo sa               | 19.89  | 13.86 | 4  | 4  | 23.23  | 22.71 | 5  | 5  | 25.32  | 14.75 | 4  | 5  |
| P10599 | Thioredoxin OS=Homo sa              | 8.02   | 22.86 | 2  | 2  | 3.93   | 12.38 | 1  | 1  |        | 0.00  |    |    |
| P62263 | 40S ribosomal protein S1            | 8.47   | 22.52 | 2  | 2  | 4.37   | 8.61  | 1  | 1  | 14.25  | 22.52 | 3  | 3  |
| P35579 | Myosin-9 OS=Homo sapi               | 166.33 | 18.47 | 26 | 33 | 130.17 | 14.95 | 21 | 27 | 143.59 | 17.96 | 23 | 28 |
| Q16718 | NADH dehydrogenase [ubiquinone] 1   | 0.00   |       |    |    | 5.37   | 22.41 | 1  | 1  |        | 0.00  |    |    |
| Q04837 | Single-stranded DNA-bind            | 8.88   | 22.30 | 2  | 2  | 9.43   | 22.30 | 2  | 2  | 9.62   | 22.30 | 2  | 2  |
| Q9Y281 | Cofilin-2 OS=Homo sapie             | 5.49   | 10.24 | 1  | 1  | 4.50   | 10.24 | 1  | 1  | 14.06  | 22.29 | 2  | 3  |
| P47985 | Cytochrome b-c1 comple              | 15.28  | 12.77 | 2  | 3  | 10.80  | 7.66  | 1  | 2  | 9.16   | 17.15 | 2  | 2  |
| P09661 | U2 small nuclear ribonuc            | 10.05  | 15.29 | 2  | 2  | 9.88   | 15.29 | 2  | 2  | 10.12  | 12.16 | 2  | 2  |
| Q9UJZ1 | Stomatin-like protein 2, n          | 15.30  | 17.70 | 3  | 3  | 14.24  | 17.13 | 3  | 3  | 10.18  | 8.99  | 2  | 2  |
| P29692 | Elongation factor 1-delta           | 16.15  | 21.71 | 4  | 4  | 18.10  | 21.71 | 4  | 4  | 10.25  | 13.17 | 2  | 2  |
| Q99497 | Protein DJ-1 OS=Homo s              | 14.11  | 21.69 | 2  | 3  | 9.24   | 21.69 | 2  | 2  | 10.20  | 21.69 | 2  | 2  |
| P63220 | 40S ribosomal protein S21 OS=Homo   | 0.00   |       |    |    | 5.30   | 21.69 | 1  | 1  |        | 0.00  |    |    |
| O75363 | Breast carcinoma-amplifie           | 23.93  | 17.12 | 5  | 5  | 30.94  | 15.41 | 4  | 6  | 13.93  | 7.53  | 3  | 3  |
| P13674 | Prolyl 4-hydroxylase subu           | 28.43  | 18.91 | 5  | 6  | 20.40  | 9.93  | 3  | 4  | 4.17   | 2.62  | 1  | 1  |
| P06748 | Nucleophosmin OS=Hom                | 19.05  | 21.43 | 4  | 4  | 26.86  | 16.67 | 3  | 5  | 15.15  | 21.43 | 3  | 3  |
| P52907 | F-actin-capping protein si          | 8.22   | 12.24 | 2  | 2  | 15.53  | 15.73 | 2  | 3  | 9.60   | 14.69 | 2  | 2  |
| O00193 | Small acidic protein OS=H           | 14.81  | 8.74  | 1  | 3  | 4.34   | 8.74  | 1  | 1  | 10.38  | 21.31 | 2  | 2  |
| P51149 | Ras-related protein Rab-7           | 4.33   | 7.73  | 1  | 1  | 4.44   | 6.76  | 1  | 1  | 8.92   | 13.53 | 2  | 2  |
| P61586 | Transforming protein Rho            | 10.66  | 21.24 | 2  | 2  | 5.52   | 8.81  | 1  | 1  | 15.77  | 21.24 | 2  | 3  |
| O43678 | NADH dehydrogenase [ul              | 4.25   | 21.21 | 1  | 1  | 3.94   | 21.21 | 1  | 1  | 4.47   | 21.21 | 1  | 1  |
| P12004 | Proliferating cell nuclear a        | 8.70   | 16.09 | 2  | 2  | 9.93   | 12.26 | 2  | 2  | 5.11   | 7.28  | 1  | 1  |
| P0CG48 | Polyubiquitin-C OS=Homo             | 8.68   | 21.02 | 1  | 2  | 4.79   | 21.02 | 1  | 1  | 4.79   | 21.02 | 1  | 1  |
| P60174 | Triosephosphate isomera             | 22.45  | 15.38 | 5  | 5  | 21.17  | 20.98 | 5  | 5  | 14.12  | 15.38 | 3  | 3  |
| O75340 | Programmed cell death p             | 4.74   | 14.14 | 1  | 1  | 5.16   | 14.14 | 1  | 1  | 8.68   | 20.94 | 2  | 2  |
| P13693 | Translationally-controlled          | 5.02   | 12.79 | 1  | 1  | 9.25   | 20.93 | 2  | 2  | 15.62  | 12.79 | 1  | 3  |
| P08729 | Keratin, type II cytoskele          | 37.75  | 18.55 | 6  | 8  | 28.08  | 15.99 | 5  | 6  | 30.30  | 18.55 | 6  | 6  |
| P48643 | T-complex protein 1 subu            | 11.04  | 8.69  | 2  | 2  | 8.21   | 6.84  | 2  | 2  | 19.24  | 11.65 | 3  | 4  |
| O43399 | Tumor protein D54 OS=H              | 9.62   | 20.87 | 2  | 2  | 9.29   | 20.87 | 2  | 2  | 5.14   | 9.22  | 1  | 1  |
| P49327 | Fatty acid synthase OS=H            | 202.63 | 13.94 | 20 | 41 | 171.15 | 16.61 | 26 | 36 | 127.40 | 13.14 | 22 | 26 |

|        |                                         |        |       |    |    |       |       |   |    |       |       |   |    |
|--------|-----------------------------------------|--------|-------|----|----|-------|-------|---|----|-------|-------|---|----|
| P49915 | GMP synthase [glutamine                 | 24.05  | 15.87 | 4  | 5  | 11.38 | 7.07  | 2 | 2  | 18.72 | 9.96  | 4 | 4  |
| P07900 | Heat shock protein HSP 9                | 49.00  | 18.58 | 8  | 11 | 26.72 | 7.79  | 4 | 6  | 45.65 | 17.21 | 7 | 9  |
| P46778 | 60S ribosomal protein L2                | 9.12   | 20.63 | 2  | 2  | 4.94  | 9.38  | 1 | 1  | 10.11 | 20.63 | 2 | 2  |
| O95292 | Vesicle-associated memb                 | 4.47   | 8.23  | 1  | 1  | 12.28 | 20.58 | 3 | 3  | 4.68  | 6.58  | 1 | 1  |
| O14818 | Proteasome subunit alpha                | 9.11   | 11.69 | 2  | 2  | 9.13  | 6.05  | 1 | 2  | 9.54  | 14.92 | 2 | 2  |
| P60660 | Myosin light polypeptide (              | 9.54   | 20.53 | 2  | 2  | 18.15 | 20.53 | 2 | 4  | 8.85  | 20.53 | 2 | 2  |
| P24534 | Elongation factor 1-beta OS=Homo sa     | 0.00   |       |    |    | 9.43  | 12.44 | 2 | 2  | 10.02 | 14.67 | 2 | 2  |
| Q15233 | Non-POU domain-containi                 | 15.17  | 15.50 | 3  | 3  | 5.52  | 4.67  | 1 | 1  | 11.42 | 9.55  | 2 | 2  |
| P98179 | Putative RNA-binding protein 3 OS=H     | 0.00   |       |    |    | 4.81  | 20.38 | 1 | 1  |       | 0.00  |   |    |
| P61019 | Ras-related protein Rab-2               | 4.09   | 6.13  | 1  | 1  | 4.23  | 6.60  | 1 | 1  | 5.74  | 7.55  | 1 | 1  |
| P50991 | T-complex protein 1 subu                | 17.12  | 14.47 | 4  | 4  | 12.77 | 9.65  | 3 | 3  | 23.45 | 17.63 | 5 | 5  |
| P42167 | Lamina-associated polype                | 15.70  | 16.08 | 3  | 3  |       | 0.00  |   |    | 9.43  | 3.96  | 2 | 2  |
| Q99798 | Aconitate hydratase, mitc               | 22.20  | 14.10 | 5  | 5  | 17.92 | 8.08  | 4 | 4  | 17.04 | 7.69  | 4 | 4  |
| P60981 | Destrin OS=Homo sapien                  | 13.32  | 20.00 | 2  | 3  | 9.52  | 9.70  | 1 | 2  | 4.68  | 9.70  | 1 | 1  |
| Q9Y333 | U6 snRNA-associated Sm-like protein     | 0.00   |       |    |    |       | 0.00  |   |    | 4.18  | 20.00 | 1 | 1  |
| Q9NVJ2 | ADP-ribosylation factor-lil             | 4.14   | 7.53  | 1  | 1  | 3.94  | 7.53  | 1 | 1  | 5.09  | 12.37 | 1 | 1  |
| P14866 | Heterogeneous nuclear ri                | 18.51  | 13.92 | 4  | 4  | 9.69  | 7.13  | 2 | 2  | 11.10 | 8.66  | 2 | 2  |
| P55072 | Transitional endoplasmic                | 37.22  | 15.63 | 7  | 8  | 27.57 | 10.67 | 5 | 6  | 29.64 | 14.89 | 6 | 6  |
| P30101 | Protein disulfide-isomer                | 9.45   | 7.13  | 2  | 2  | 10.08 | 6.14  | 2 | 2  | 28.59 | 19.80 | 6 | 6  |
| Q16891 | MICOS complex subunit M                 | 13.56  | 6.60  | 3  | 3  | 12.18 | 6.07  | 3 | 3  | 14.94 | 10.82 | 3 | 3  |
| Q7KZF4 | Staphylococcal nuclease (               | 61.64  | 19.78 | 9  | 12 | 41.77 | 12.86 | 6 | 8  | 27.07 | 10.55 | 4 | 5  |
| P26885 | Peptidyl-prolyl cis-trans isomerase FKE | 0.00   |       |    |    |       | 0.00  |   |    | 5.22  | 19.72 | 1 | 1  |
| Q9BUP0 | EF-hand domain-containi                 | 11.35  | 12.55 | 2  | 2  | 4.33  | 7.11  | 1 | 1  | 4.56  | 7.11  | 1 | 1  |
| P12532 | Creatine kinase U-type, n               | 25.70  | 19.66 | 4  | 5  | 5.88  | 5.04  | 1 | 1  | 16.51 | 11.27 | 2 | 3  |
| P61513 | 60S ribosomal protein L3                | 9.26   | 19.57 | 1  | 2  |       | 0.00  |   |    | 4.16  | 19.57 | 1 | 1  |
| Q6DRA6 | Putative histone H2B type               | 4.46   | 9.15  | 1  | 1  |       | 0.00  |   |    | 4.13  | 10.37 | 1 | 1  |
| P58107 | Epiplakin OS=Homo sapi                  | 107.82 | 19.51 | 17 | 21 | 64.15 | 12.73 | 9 | 12 | 60.72 | 9.63  | 9 | 12 |
| P45880 | Voltage-dependent anion                 | 11.61  | 7.82  | 1  | 2  | 9.62  | 12.59 | 2 | 2  | 15.08 | 14.63 | 2 | 3  |
| O75874 | Isocitrate dehydrogenase                | 9.20   | 7.97  | 2  | 2  | 8.53  | 6.76  | 2 | 2  | 13.62 | 12.80 | 3 | 3  |
| Q9HB71 | Calcyclin-binding protein               | 8.59   | 19.30 | 2  | 2  | 6.08  | 10.53 | 1 | 1  | 16.28 | 19.30 | 2 | 3  |
| P29966 | Myristoylated alanine-rich              | 11.52  | 19.28 | 2  | 2  |       | 0.00  |   |    | 12.30 | 19.28 | 2 | 2  |
| Q06323 | Proteasome activator con                | 20.39  | 19.28 | 3  | 4  | 9.64  | 13.65 | 2 | 2  | 10.30 | 13.65 | 2 | 2  |
| P41208 | Centrin-2 OS=Homo sapiens GN=CET        | 0.00   |       |    |    |       | 0.00  |   |    | 5.41  | 19.19 | 1 | 1  |
| Q15084 | Protein disulfide-isomer                | 8.86   | 6.82  | 2  | 2  | 23.41 | 16.14 | 4 | 5  | 26.34 | 19.09 | 5 | 5  |
| Q13155 | Aminoacyl tRNA synthase complex-int     | 0.00   |       |    |    | 4.81  | 7.81  | 1 | 1  | 6.74  | 11.25 | 1 | 1  |
| P28074 | Proteasome subunit beta                 | 13.85  | 19.01 | 3  | 3  |       | 0.00  |   |    | 8.34  | 11.03 | 2 | 2  |
| Q8N6T3 | ADP-ribosylation factor G               | 10.27  | 14.04 | 2  | 2  | 4.47  | 3.69  | 1 | 1  | 16.50 | 8.62  | 2 | 3  |
| O43598 | 2'-deoxynucleoside 5'-ph                | 5.34   | 18.97 | 1  | 1  |       | 0.00  |   |    |       | 0.00  |   |    |
| Q9UBW8 | COP9 signalosome compl                  | 9.41   | 10.91 | 2  | 2  |       | 0.00  |   |    | 5.19  | 8.00  | 1 | 1  |

|        |                                          |       |       |   |    |       |       |   |   |       |       |   |   |
|--------|------------------------------------------|-------|-------|---|----|-------|-------|---|---|-------|-------|---|---|
| P08195 | 4F2 cell-surface antigen                 | 10.32 | 6.83  | 2 | 2  | 12.73 | 8.10  | 3 | 3 | 26.60 | 11.59 | 4 | 5 |
| P08107 | Heat shock 70 kDa protei                 | 20.64 | 12.32 | 4 | 4  | 43.14 | 18.56 | 6 | 8 | 46.84 | 18.88 | 7 | 9 |
| P02545 | Prelamin-A/C OS=Homo                     | 32.18 | 17.17 | 7 | 7  | 33.57 | 15.21 | 6 | 7 | 38.63 | 16.87 | 7 | 8 |
| P35270 | Sepiapterin reductase OS                 | 9.62  | 13.03 | 2 | 2  | 9.41  | 13.03 | 2 | 2 | 9.32  | 13.03 | 2 | 2 |
| P35232 | Prohibitin OS=Homo sapi                  | 3.91  | 5.15  | 1 | 1  | 15.96 | 13.60 | 2 | 3 | 8.94  | 11.40 | 2 | 2 |
| P15374 | Ubiquitin carboxyl-termin                | 7.74  | 13.04 | 2 | 2  | 12.69 | 11.74 | 2 | 3 | 4.33  | 6.96  | 1 | 1 |
| P07339 | Cathepsin D OS=Homo sa                   | 17.76 | 15.53 | 4 | 4  | 17.46 | 16.02 | 4 | 4 | 13.84 | 11.89 | 3 | 3 |
| O00299 | Chloride intracellular char              | 10.97 | 18.67 | 2 | 2  | 10.70 | 18.67 | 2 | 2 | 10.47 | 18.67 | 2 | 2 |
| O75947 | ATP synthase subunit d, i                | 10.19 | 9.94  | 1 | 2  | 4.41  | 9.94  | 1 | 1 | 9.30  | 18.63 | 2 | 2 |
| Q9H3K6 | BolA-like protein 2 OS=H                 | 3.88  | 18.60 | 1 | 1  | 4.77  | 18.60 | 1 | 1 | 5.13  | 18.60 | 1 | 1 |
| P31939 | Bifunctional purine biosyr               | 17.92 | 13.18 | 4 | 4  | 19.49 | 11.15 | 4 | 4 | 14.63 | 9.63  | 3 | 3 |
| P63173 | 60S ribosomal protein L38 OS=Homo        | 0.00  |       |   |    | 9.02  | 18.57 | 1 | 2 |       | 0.00  |   |   |
| P13645 | Keratin, type I cytoskelet               | 56.32 | 18.49 | 7 | 10 | 37.13 | 17.47 | 6 | 7 | 21.49 | 11.13 | 3 | 4 |
| Q99653 | Calcineurin B homologous                 | 3.95  | 8.21  | 1 | 1  | 9.63  | 10.26 | 1 | 2 |       | 0.00  |   |   |
| Q96FQ6 | Protein S100-A16 OS=Ho                   | 4.91  | 18.45 | 1 | 1  | 4.36  | 18.45 | 1 | 1 | 8.75  | 18.45 | 1 | 2 |
| Q9Y3D7 | Mitochondrial import inne                | 5.02  | 18.40 | 1 | 1  | 4.63  | 18.40 | 1 | 1 |       | 0.00  |   |   |
| P18754 | Regulator of chromosome                  | 10.71 | 11.40 | 2 | 2  |       | 0.00  |   |   | 17.83 | 18.29 | 3 | 3 |
| P14174 | Macrophage migration inf                 | 4.16  | 18.26 | 1 | 1  | 4.72  | 18.26 | 1 | 1 | 4.34  | 18.26 | 1 | 1 |
| O95336 | 6-phosphogluconolactona                  | 5.83  | 8.14  | 1 | 1  |       | 0.00  |   |   | 9.70  | 18.22 | 2 | 2 |
| O95833 | Chloride intracellular channel protein 3 | 0.00  |       |   |    | 8.88  | 18.22 | 2 | 2 |       | 0.00  |   |   |
| P43490 | Nicotinamide phosphoribo                 | 30.87 | 18.13 | 5 | 6  | 11.84 | 7.13  | 2 | 2 | 27.19 | 15.07 | 4 | 5 |
| Q8WXX5 | DnaJ homolog subfamily                   | 4.73  | 7.69  | 1 | 1  | 5.26  | 10.38 | 1 | 1 | 10.73 | 18.08 | 2 | 2 |
| Q99623 | Prohibitin-2 OS=Homo sa                  | 19.08 | 18.06 | 4 | 4  | 14.15 | 14.72 | 3 | 3 | 10.69 | 10.70 | 2 | 2 |
| O43752 | Syntaxin-6 OS=Homo sap                   | 5.14  | 9.80  | 1 | 1  |       | 0.00  |   |   | 4.96  | 8.24  | 1 | 1 |
| P16435 | NADPH--cytochrome P450                   | 21.63 | 9.01  | 3 | 4  | 9.64  | 5.91  | 2 | 2 | 24.61 | 11.82 | 4 | 5 |
| Q92597 | Protein NDRG1 OS=Homo                    | 9.42  | 8.12  | 2 | 2  | 8.41  | 7.61  | 2 | 2 | 9.82  | 10.41 | 2 | 2 |
| P25787 | Proteasome subunit alpha type-2 OS=      | 0.00  |       |   |    | 9.48  | 17.95 | 2 | 2 | 10.25 | 17.95 | 2 | 2 |
| Q15369 | Transcription elongation f               | 5.17  | 17.86 | 1 | 1  | 9.95  | 17.86 | 1 | 2 | 10.73 | 17.86 | 1 | 2 |
| P34932 | Heat shock 70 kDa protei                 | 38.45 | 13.81 | 7 | 8  | 24.65 | 11.90 | 5 | 5 | 17.62 | 6.79  | 3 | 3 |
| P83916 | Chromobox protein homoc                  | 4.42  | 8.65  | 1 | 1  | 4.53  | 8.65  | 1 | 1 | 9.09  | 17.84 | 2 | 2 |
| O00429 | Dynamin-1-like protein O                 | 26.43 | 14.81 | 5 | 5  | 24.26 | 10.46 | 4 | 5 | 10.22 | 5.16  | 2 | 2 |
| P05091 | Aldehyde dehydrogenase                   | 14.85 | 9.86  | 3 | 3  | 18.08 | 11.80 | 4 | 4 | 24.69 | 12.77 | 4 | 5 |
| Q07021 | Complement component                     | 9.93  | 17.73 | 2 | 2  | 4.49  | 7.09  | 1 | 1 | 4.67  | 7.09  | 1 | 1 |
| P18669 | Phosphoglycerate mutase                  | 15.78 | 17.72 | 2 | 3  |       | 0.00  |   |   | 10.90 | 7.09  | 1 | 2 |
| P31942 | Heterogeneous nuclear ri                 | 4.40  | 4.91  | 1 | 1  | 14.07 | 17.63 | 3 | 3 | 4.96  | 4.91  | 1 | 1 |
| Q08257 | Quinone oxidoreductase OS=Homo sa        | 0.00  |       |   |    | 5.02  | 8.21  | 1 | 1 | 5.93  | 9.42  | 1 | 1 |
| P27695 | DNA-(apurinic or apyrimic                | 9.03  | 10.69 | 2 | 2  | 9.57  | 12.26 | 2 | 2 | 19.64 | 17.61 | 3 | 4 |
| P18859 | ATP synthase-coupling fa                 | 4.39  | 17.59 | 1 | 1  | 5.12  | 17.59 | 1 | 1 | 9.56  | 17.59 | 1 | 2 |
| P12814 | Alpha-actinin-1 OS=Homo                  | 33.48 | 10.76 | 6 | 7  | 13.89 | 4.93  | 3 | 3 | 40.22 | 12.67 | 7 | 8 |

|        |                                      |       |       |    |       |       |       |    |       |       |       |    |    |
|--------|--------------------------------------|-------|-------|----|-------|-------|-------|----|-------|-------|-------|----|----|
| P00966 | Argininosuccinate synthase OS=Homo   | 0.00  |       |    | 40.37 | 17.48 | 4     | 8  | 19.36 | 11.89 | 3     | 4  |    |
| P82909 | 28S ribosomal protein S3             | 4.65  | 17.48 | 1  | 1     | 4.16  | 17.48 | 1  | 1     | 4.49  | 17.48 | 1  | 1  |
| Q96KP4 | Cytosolic non-specific dip           | 4.07  | 2.95  | 1  | 1     | 13.53 | 9.89  | 3  | 3     | 13.74 | 10.53 | 3  | 3  |
| P09651 | Heterogeneous nuclear ri             | 10.44 | 4.57  | 2  | 2     | 18.21 | 12.90 | 4  | 4     | 28.00 | 17.20 | 4  | 6  |
| Q9NRV9 | Heme-binding protein 1 C             | 8.51  | 17.46 | 2  | 2     | 5.17  | 8.99  | 1  | 1     | 5.40  | 8.99  | 1  | 1  |
| O75369 | Filamin-B OS=Homo sapi               | 73.58 | 11.53 | 16 | 16    | 60.79 | 8.22  | 12 | 13    | 62.33 | 9.92  | 11 | 12 |
| P00761 | Trypsin OS=Sus scrofa Pl             | 31.68 | 17.32 | 2  | 6     | 24.00 | 8.66  | 1  | 4     | 16.11 | 17.32 | 2  | 3  |
| P46940 | Ras GTPase-activating-lik            | 55.10 | 11.59 | 11 | 11    | 32.11 | 7.18  | 6  | 6     | 50.80 | 9.72  | 9  | 10 |
| P99999 | Cytochrome c OS=Homo sapiens GN=     | 0.00  |       |    |       |       | 0.00  |    |       | 4.26  | 17.14 | 1  | 1  |
| P20042 | Eukaryotic translation init          | 4.38  | 6.61  | 1  | 1     | 4.05  | 4.50  | 1  | 1     | 5.50  | 6.01  | 1  | 1  |
| Q9Y6U3 | Adseverin OS=Homo sap                | 19.70 | 9.51  | 4  | 4     | 25.03 | 11.33 | 5  | 5     | 20.06 | 10.49 | 4  | 4  |
| Q8NCW5 | NAD(P)H-hydrate epimer               | 12.16 | 17.01 | 3  | 3     | 4.35  | 6.25  | 1  | 1     | 4.41  | 6.60  | 1  | 1  |
| Q15836 | Vesicle-associated memb              | 5.49  | 17.00 | 1  | 1     | 4.58  | 17.00 | 1  | 1     | 4.42  | 17.00 | 1  | 1  |
| P62937 | Peptidyl-prolyl cis-trans is         | 13.90 | 16.97 | 2  | 3     | 8.70  | 16.97 | 2  | 2     | 4.24  | 9.09  | 1  | 1  |
| Q8N4Q1 | Mitochondrial intermembrane space in | 0.00  |       |    |       |       | 0.00  |    |       | 4.86  | 16.90 | 1  | 1  |
| P08238 | Heat shock protein HSP 9             | 61.46 | 16.71 | 8  | 14    | 36.94 | 10.50 | 5  | 8     | 26.95 | 10.77 | 6  | 6  |
| Q9Y5J7 | Mitochondrial import inner membrane  | 0.00  |       |    |       |       | 0.00  |    |       | 4.91  | 16.85 | 1  | 1  |
| P63244 | Guanine nucleotide-bindin            | 4.94  | 5.05  | 1  | 1     | 14.71 | 16.72 | 3  | 3     | 10.03 | 12.62 | 2  | 2  |
| Q9Y4L1 | Hypoxia up-regulated pro             | 34.26 | 11.11 | 6  | 7     | 34.87 | 9.81  | 5  | 6     | 25.05 | 9.21  | 5  | 5  |
| O75347 | Tubulin-specific chaperon            | 11.04 | 16.67 | 2  | 2     | 4.10  | 13.89 | 1  | 1     | 11.06 | 16.67 | 2  | 2  |
| P01767 | Ig heavy chain V-III region BUT OS=H | 0.00  |       |    |       |       | 0.00  |    |       | 4.57  | 16.52 | 1  | 1  |
| P36873 | Serine/threonine-protein             | 8.17  | 11.15 | 2  | 2     | 13.24 | 9.60  | 2  | 3     | 4.86  | 5.26  | 1  | 1  |
| P30044 | Peroxiredoxin-5, mitochol            | 4.64  | 8.41  | 1  | 1     | 9.17  | 16.36 | 2  | 2     |       | 0.00  |    |    |
| Q9BPX5 | Actin-related protein 2/3            | 3.89  | 7.84  | 1  | 1     | 4.26  | 8.50  | 1  | 1     | 4.13  | 8.50  | 1  | 1  |
| Q15019 | Septin-2 OS=Homo sapie               | 4.67  | 4.43  | 1  | 1     | 9.05  | 11.63 | 2  | 2     | 8.36  | 9.14  | 2  | 2  |
| Q9H910 | Hematological and neurol             | 4.34  | 8.95  | 1  | 1     | 4.20  | 7.37  | 1  | 1     |       | 0.00  |    |    |
| P28072 | Proteasome subunit beta              | 6.12  | 16.32 | 1  | 1     |       | 0.00  |    |       |       | 0.00  |    |    |
| P12956 | X-ray repair cross-comple            | 9.42  | 5.42  | 2  | 2     | 5.13  | 2.30  | 1  | 1     | 22.17 | 13.14 | 5  | 5  |
| P07476 | Involucrin OS=Homo sapiens GN=IVL    | 0.00  |       |    |       | 4.88  | 3.42  | 1  | 1     | 29.05 | 16.24 | 5  | 6  |
| P62140 | Serine/threonine-protein             | 8.78  | 11.01 | 2  | 2     | 13.24 | 9.48  | 2  | 3     | 4.86  | 5.20  | 1  | 1  |
| P02656 | Apolipoprotein C-III OS=             | 5.07  | 16.16 | 1  | 1     | 4.72  | 16.16 | 1  | 1     | 5.32  | 16.16 | 1  | 1  |
| Q04323 | UBX domain-containing protein 1 OS=  | 0.00  |       |    |       | 4.78  | 9.76  | 1  | 1     | 5.31  | 6.40  | 1  | 1  |
| Q9H299 | SH3 domain-binding glut              | 5.23  | 16.13 | 1  | 1     | 4.70  | 16.13 | 1  | 1     | 5.02  | 16.13 | 1  | 1  |
| P62316 | Small nuclear ribonucleoprotein Sm D | 0.00  |       |    |       | 4.29  | 15.25 | 1  | 1     | 4.44  | 16.10 | 1  | 1  |
| P48735 | Isocitrate dehydrogenase             | 25.13 | 15.93 | 5  | 5     | 14.77 | 9.73  | 3  | 3     | 9.70  | 6.64  | 2  | 2  |
| P13804 | Electron transfer flavopro           | 4.67  | 5.71  | 1  | 1     | 4.63  | 5.41  | 1  | 1     | 4.15  | 4.80  | 1  | 1  |
| P06396 | Gelsolin OS=Homo sapie               | 26.95 | 13.55 | 6  | 6     | 15.53 | 7.29  | 3  | 3     | 20.12 | 10.36 | 4  | 4  |
| P09429 | High mobility group prote            | 5.68  | 8.84  | 1  | 1     | 9.27  | 15.81 | 2  | 2     | 4.54  | 6.98  | 1  | 1  |
| A8MWD9 | Putative small nuclear rib           | 4.36  | 15.79 | 1  | 1     | 4.01  | 15.79 | 1  | 1     |       | 0.00  |    |    |

|        |                                         |       |       |   |   |       |       |   |   |       |       |   |   |
|--------|-----------------------------------------|-------|-------|---|---|-------|-------|---|---|-------|-------|---|---|
| Q6IBS0 | Twinfilin-2 OS=Homo sapiens             | 13.62 | 15.76 | 3 | 3 | 5.01  | 5.44  | 1 | 1 | 9.59  | 10.89 | 2 | 2 |
| P13010 | X-ray repair cross-complement           | 14.83 | 9.70  | 3 | 3 | 19.05 | 9.02  | 3 | 4 | 4.11  | 3.28  | 1 | 1 |
| P42166 | Lamina-associated polypeptide           | 15.07 | 10.23 | 3 | 3 |       | 0.00  |   |   | 13.78 | 5.48  | 3 | 3 |
| P60953 | Cell division control protein           | 14.16 | 15.71 | 2 | 3 | 9.55  | 8.90  | 1 | 2 | 10.68 | 8.90  | 1 | 2 |
| P14550 | Alcohol dehydrogenase [class            | 13.69 | 11.38 | 3 | 3 | 18.78 | 15.69 | 4 | 4 | 4.85  | 5.85  | 1 | 1 |
| P52565 | Rho GDP-dissociation inhibitor          | 14.37 | 15.69 | 3 | 3 | 4.44  | 7.35  | 1 | 1 | 9.91  | 15.20 | 2 | 2 |
| Q9Y2T7 | Y-box-binding protein 2 C               | 22.33 | 15.66 | 3 | 5 | 3.93  | 4.67  | 1 | 1 | 13.91 | 8.79  | 2 | 3 |
| P02666 | Beta-casein - Bos taurus                | 20.92 | 15.63 | 2 | 4 | 26.04 | 15.63 | 2 | 5 | 20.53 | 15.63 | 2 | 4 |
| Q15907 | Ras-related protein Rab-1               | 4.20  | 5.96  | 1 | 1 | 9.32  | 15.60 | 2 | 2 | 5.19  | 9.63  | 1 | 1 |
| P63241 | Eukaryotic translation initiation       | 21.92 | 15.58 | 2 | 4 | 17.05 | 15.58 | 2 | 3 | 27.94 | 15.58 | 2 | 5 |
| Q00169 | Phosphatidylinositol transfer           | 4.78  | 7.04  | 1 | 1 | 4.35  | 7.04  | 1 | 1 | 10.36 | 8.52  | 1 | 2 |
| Q9H6S3 | Epidermal growth factor receptor        | 20.35 | 10.49 | 3 | 4 | 19.26 | 10.21 | 3 | 4 | 30.26 | 15.52 | 5 | 6 |
| P42677 | 40S ribosomal protein S2                | 3.86  | 15.48 | 1 | 1 |       | 0.00  |   |   |       | 0.00  |   |   |
| P22695 | Cytochrome b-c1 complex                 | 15.26 | 11.70 | 3 | 3 | 17.42 | 11.48 | 3 | 4 | 10.97 | 7.51  | 2 | 2 |
| P61457 | Pterin-4-alpha-carbinolamine dehydrat   |       | 0.00  |   |   | 4.51  | 15.38 | 1 | 1 | 4.90  | 15.38 | 1 | 1 |
| O75396 | Vesicle-trafficking protein             | 9.37  | 15.35 | 2 | 2 | 4.56  | 8.84  | 1 | 1 | 13.93 | 15.35 | 2 | 3 |
| Q9NYL9 | Tropomodulin-3 OS=Homo sapiens          | 5.10  | 5.97  | 1 | 1 | 8.14  | 9.94  | 2 | 2 | 5.53  | 5.40  | 1 | 1 |
| P31949 | Protein S100-A11 OS=Homo sapiens        |       | 0.00  |   |   | 10.88 | 15.24 | 1 | 2 |       | 0.00  |   |   |
| Q08380 | Galectin-3-binding protein              | 27.28 | 15.21 | 5 | 6 | 4.35  | 2.39  | 1 | 1 | 5.85  | 3.25  | 1 | 1 |
| P62306 | Small nuclear ribonucleoprotein F OS=   |       | 0.00  |   |   |       |       |   |   | 4.76  | 15.12 | 1 | 1 |
| O76003 | Glutaredoxin-3 OS=Homo sapiens          | 8.63  | 7.46  | 2 | 2 |       | 0.00  |   |   | 5.15  | 7.46  | 1 | 1 |
| P09960 | Leukotriene A-4 hydrolase               | 17.99 | 10.31 | 4 | 4 | 8.72  | 4.42  | 2 | 2 | 23.37 | 10.47 | 4 | 5 |
| P40227 | T-complex protein 1 subunit             | 24.00 | 14.88 | 4 | 5 | 28.64 | 14.88 | 4 | 6 | 14.58 | 7.91  | 2 | 3 |
| P02663 | Alpha-S2-casein [Contains               | 20.38 | 14.86 | 2 | 4 | 11.63 | 9.91  | 1 | 2 | 18.09 | 9.91  | 1 | 3 |
| Q01105 | Protein SET OS=Homo sapiens             | 19.19 | 11.03 | 2 | 4 | 11.03 | 10.00 | 2 | 2 | 10.39 | 10.00 | 2 | 2 |
| Q99807 | Ubiquinone biosynthesis protein COQ7    |       | 0.00  |   |   | 4.79  | 14.75 | 1 | 1 |       | 0.00  |   |   |
| Q9Y5L4 | Mitochondrial import inner              | 5.21  | 14.74 | 1 | 1 |       | 0.00  |   |   | 5.32  | 14.74 | 1 | 1 |
| P09525 | Annexin A4 OS=Homo sapiens              | 14.13 | 14.73 | 3 | 3 | 8.98  | 10.03 | 2 | 2 | 4.91  | 5.02  | 1 | 1 |
| Q86U42 | Polyadenylate-binding protein 2 OS=H    |       | 0.00  |   |   |       | 0.00  |   |   | 5.25  | 14.71 | 1 | 1 |
| Q15121 | Astrocytic phosphoprotein PEA-15 OS=    |       | 0.00  |   |   |       | 0.00  |   |   | 4.58  | 14.62 | 1 | 1 |
| Q15691 | Microtubule-associated protein          | 4.09  | 4.48  | 1 | 1 | 5.42  | 10.07 | 1 | 1 |       | 0.00  |   |   |
| P25325 | 3-mercaptopyruvate sulfurtransferase    |       | 0.00  |   |   | 9.97  | 14.48 | 2 | 2 | 5.10  | 9.09  | 1 | 1 |
| P00338 | L-lactate dehydrogenase                 | 30.77 | 9.64  | 2 | 6 | 25.56 | 9.64  | 2 | 5 | 20.70 | 14.46 | 3 | 4 |
| P32322 | Pyrroline-5-carboxylate reductase       | 12.27 | 9.09  | 2 | 3 | 8.52  | 10.97 | 2 | 2 |       | 0.00  |   |   |
| Q9HCY8 | Protein S100-A14 OS=Homo sapiens        | 5.01  | 14.42 | 1 | 1 | 5.53  | 14.42 | 1 | 1 | 4.55  | 14.42 | 1 | 1 |
| P58546 | Myotrophin OS=Homo sapiens              | 6.24  | 14.41 | 1 | 1 | 10.75 | 14.41 | 1 | 2 | 5.01  | 14.41 | 1 | 1 |
| P23396 | 40S ribosomal protein S3                | 8.96  | 14.40 | 2 | 2 | 13.33 | 14.40 | 2 | 3 | 4.98  | 9.05  | 1 | 1 |
| Q14103 | Heterogeneous nuclear ribonucleoprotein | 9.68  | 9.01  | 2 | 2 | 14.46 | 9.30  | 2 | 3 | 9.15  | 9.30  | 2 | 2 |
| Q15365 | Poly(rC)-binding protein                | 9.58  | 5.62  | 1 | 2 | 10.22 | 14.33 | 2 | 2 | 9.93  | 5.62  | 1 | 2 |



|        |                                        |       |       |   |    |       |       |   |   |       |       |   |   |
|--------|----------------------------------------|-------|-------|---|----|-------|-------|---|---|-------|-------|---|---|
| P13995 | Bifunctional methylenetet              | 8.85  | 14.29 | 2 | 2  |       | 0.00  |   |   |       | 0.00  |   |   |
| P21281 | V-type proton ATPase sul               | 5.16  | 2.74  | 1 | 1  | 4.57  | 4.31  | 1 | 1 | 14.79 | 11.55 | 3 | 3 |
| P15559 | NAD(P)H dehydrogenase                  | 5.22  | 6.57  | 1 | 1  | 16.24 | 14.23 | 2 | 3 | 21.67 | 14.23 | 2 | 4 |
| O00629 | Importin subunit alpha-3 OS=Homo sa    | 0.00  |       |   |    | 15.28 | 11.52 | 3 | 3 | 21.12 | 10.94 | 3 | 4 |
| P50402 | Emerin OS=Homo sapien                  | 8.85  | 14.17 | 2 | 2  |       | 0.00  |   |   | 4.81  | 5.91  | 1 | 1 |
| Q13283 | Ras GTPase-activating pr               | 14.60 | 10.94 | 3 | 3  | 16.30 | 7.08  | 2 | 3 | 19.43 | 14.16 | 4 | 4 |
| P62333 | 26S protease regulatory s              | 10.23 | 10.54 | 2 | 2  | 5.24  | 7.71  | 1 | 1 | 4.18  | 3.60  | 1 | 1 |
| Q9P2E9 | Ribosome-binding proteir               | 52.44 | 11.91 | 9 | 11 | 43.53 | 10.07 | 8 | 9 | 41.67 | 7.73  | 5 | 8 |
| Q92905 | COP9 signalosome compl                 | 5.88  | 8.38  | 1 | 1  |       | 0.00  |   |   | 10.91 | 5.69  | 1 | 2 |
| O95139 | NADH dehydrogenase [ubiquinone] 1      | 0.00  |       |   |    |       | 0.00  |   |   | 4.18  | 14.06 | 1 | 1 |
| P05386 | 60S acidic ribosomal prot              | 3.94  | 14.04 | 1 | 1  |       | 0.00  |   |   |       | 0.00  |   |   |
| P51991 | Heterogeneous nuclear ri               | 5.06  | 5.82  | 1 | 1  | 3.91  | 4.23  | 1 | 1 | 15.12 | 9.79  | 2 | 3 |
| Q9Y5M8 | Signal recognition particl             | 9.45  | 14.02 | 2 | 2  | 9.28  | 14.02 | 2 | 2 | 5.57  | 7.01  | 1 | 1 |
| Q9Y3F4 | Serine-threonine kinase r              | 9.78  | 8.86  | 2 | 2  | 14.87 | 10.29 | 2 | 3 | 5.32  | 5.14  | 1 | 1 |
| P05023 | Sodium/potassium-transp                | 34.47 | 10.75 | 6 | 7  | 13.95 | 5.28  | 3 | 3 | 25.90 | 5.87  | 3 | 5 |
| P05198 | Eukaryotic translation init            | 3.92  | 3.81  | 1 | 1  |       | 0.00  |   |   | 9.53  | 10.16 | 2 | 2 |
| O75390 | Citrate synthase, mitoch               | 13.37 | 6.65  | 2 | 3  | 4.17  | 3.43  | 1 | 1 | 14.14 | 13.95 | 3 | 3 |
| O95168 | NADH dehydrogenase [ul                 | 4.13  | 13.95 | 1 | 1  |       | 0.00  |   |   |       | 0.00  |   |   |
| Q9NZ45 | CDGSH iron-sulfur domai                | 4.39  | 13.89 | 1 | 1  |       | 0.00  |   |   | 4.53  | 13.89 | 1 | 1 |
| P28331 | NADH-ubiquinone oxidore                | 23.43 | 11.55 | 5 | 5  | 8.21  | 4.54  | 2 | 2 | 24.57 | 11.28 | 5 | 5 |
| Q07020 | 60S ribosomal protein L11              | 8.63  | 13.83 | 2 | 2  | 4.69  | 6.91  | 1 | 1 | 8.64  | 13.83 | 2 | 2 |
| P55209 | Nucleosome assembly pro                | 9.39  | 9.21  | 2 | 2  | 4.67  | 4.35  | 1 | 1 | 9.49  | 8.95  | 2 | 2 |
| Q15388 | Mitochondrial import rece              | 11.46 | 13.79 | 1 | 2  | 5.65  | 13.79 | 1 | 1 | 5.24  | 13.79 | 1 | 1 |
| P07954 | Fumarate hydratase, mito               | 15.82 | 10.78 | 3 | 3  | 13.47 | 9.22  | 3 | 3 | 15.88 | 8.04  | 2 | 3 |
| P16989 | Y-box-binding protein 3 C              | 23.05 | 13.71 | 3 | 5  | 3.93  | 4.57  | 1 | 1 | 18.74 | 13.71 | 3 | 4 |
| O14907 | Tax1-binding protein 3 OS=Homo sap     | 0.00  |       |   |    | 3.95  | 13.71 | 1 | 1 | 4.41  | 13.71 | 1 | 1 |
| P25815 | Protein S100-P OS=Homo                 | 4.27  | 13.68 | 1 | 1  | 4.19  | 13.68 | 1 | 1 |       | 0.00  |   |   |
| Q9Y5Z4 | Heme-binding protein 2 C               | 4.33  | 7.32  | 1 | 1  | 8.90  | 13.66 | 2 | 2 | 4.31  | 6.34  | 1 | 1 |
| P31943 | Heterogeneous nuclear ri               | 28.74 | 13.59 | 4 | 6  | 8.24  | 9.58  | 2 | 2 | 16.12 | 9.80  | 3 | 3 |
| Q9NP72 | Ras-related protein Rab-1              | 4.08  | 6.31  | 1 | 1  | 4.06  | 7.28  | 1 | 1 | 4.31  | 6.31  | 1 | 1 |
| O96008 | Mitochondrial import rece              | 8.68  | 13.57 | 2 | 2  |       | 0.00  |   |   | 4.36  | 4.16  | 1 | 1 |
| Q13509 | Tubulin beta-3 chain OS=               | 24.36 | 13.56 | 4 | 5  | 20.11 | 10.89 | 3 | 4 | 14.71 | 10.89 | 3 | 3 |
| Q16204 | Coiled-coil domain-contai              | 13.82 | 10.55 | 3 | 3  | 5.52  | 4.01  | 1 | 1 | 15.39 | 6.96  | 3 | 3 |
| O75531 | Barrier-to-autointegration factor OS=H | 0.00  |       |   |    | 4.27  | 13.48 | 1 | 1 |       | 0.00  |   |   |
| P62241 | 40S ribosomal protein S8               | 8.84  | 13.46 | 2 | 2  | 4.76  | 6.25  | 1 | 1 | 4.82  | 6.25  | 1 | 1 |
| P35908 | Keratin, type II cytoskele             | 4.88  | 1.88  | 1 | 1  | 27.73 | 7.82  | 4 | 6 | 18.49 | 7.51  | 4 | 4 |
| Q00796 | Sorbitol dehydrogenase C               | 13.11 | 13.45 | 3 | 3  |       | 0.00  |   |   |       | 0.00  |   |   |
| Q04917 | 14-3-3 protein eta OS=H                | 9.85  | 7.72  | 1 | 2  | 5.10  | 7.72  | 1 | 1 | 14.77 | 13.41 | 2 | 3 |
| P41250 | Glycine--tRNA ligase OS=               | 30.01 | 13.40 | 5 | 6  | 10.21 | 5.55  | 2 | 2 | 19.86 | 11.64 | 4 | 4 |

|        |                                         |       |       |   |   |       |       |   |   |       |       |   |   |
|--------|-----------------------------------------|-------|-------|---|---|-------|-------|---|---|-------|-------|---|---|
| Q9H444 | Charged multivesicular body             | 4.25  | 6.25  | 1 | 1 | 4.71  | 7.14  | 1 | 1 |       | 0.00  |   |   |
| P11177 | Pyruvate dehydrogenase                  | 8.03  | 8.91  | 2 | 2 | 9.29  | 8.91  | 2 | 2 | 5.11  | 4.46  | 1 | 1 |
| P61981 | 14-3-3 protein gamma O                  | 10.99 | 13.36 | 2 | 2 | 10.51 | 13.36 | 2 | 2 | 8.87  | 13.36 | 2 | 2 |
| P62993 | Growth factor receptor-b                | 4.77  | 13.36 | 1 | 1 |       | 0.00  |   |   |       | 0.00  |   |   |
| Q9UJS0 | Calcium-binding mitochor                | 20.95 | 10.81 | 4 | 4 | 19.76 | 10.52 | 4 | 4 | 9.93  | 5.19  | 2 | 2 |
| P18124 | 60S ribosomal protein L7                | 4.64  | 5.65  | 1 | 1 |       | 0.00  |   |   | 4.58  | 7.66  | 1 | 1 |
| P49411 | Elongation factor Tu, mito              | 4.91  | 3.98  | 1 | 1 | 13.31 | 10.62 | 3 | 3 | 17.29 | 10.18 | 3 | 4 |
| Q9Y2Q3 | Glutathione S-transferase               | 8.87  | 13.27 | 2 | 2 | 8.89  | 13.27 | 2 | 2 | 9.49  | 13.27 | 2 | 2 |
| Q14257 | Reticulocalbin-2 OS=Hom                 | 10.26 | 7.26  | 1 | 2 | 5.61  | 5.99  | 1 | 1 | 5.43  | 7.26  | 1 | 1 |
| P05455 | Lupus La protein OS=Hom                 | 17.99 | 13.24 | 4 | 4 | 8.20  | 6.86  | 2 | 2 | 4.35  | 3.43  | 1 | 1 |
| P19338 | Nucleolin OS=Homo sapi                  | 44.44 | 13.24 | 7 | 9 | 41.70 | 11.27 | 6 | 8 | 36.85 | 10.85 | 4 | 7 |
| P35244 | Replication protein A 14 kDa subunit C  | 0.00  |       |   |   |       |       |   |   | 4.57  | 13.22 | 1 | 1 |
| Q9BWF3 | RNA-binding protein 4 OS                | 4.89  | 4.40  | 1 | 1 | 4.32  | 4.40  | 1 | 1 | 5.32  | 8.79  | 1 | 1 |
| Q9NX55 | Huntingtin-interacting pro              | 4.76  | 13.18 | 1 | 1 | 4.23  | 13.18 | 1 | 1 |       | 0.00  |   |   |
| P06702 | Protein S100-A9 OS=Hom                  | 8.22  | 13.16 | 1 | 2 |       | 0.00  |   |   |       | 0.00  |   |   |
| Q9Y224 | UPF0568 protein C14orf1                 | 3.84  | 6.56  | 1 | 1 |       | 0.00  |   |   | 5.14  | 6.56  | 1 | 1 |
| Q8IY81 | pre-rRNA processing prot                | 9.57  | 5.08  | 2 | 2 | 18.83 | 10.04 | 4 | 4 | 15.89 | 8.03  | 3 | 3 |
| Q6P1L8 | 39S ribosomal protein L1                | 4.94  | 13.10 | 1 | 1 | 5.20  | 13.10 | 1 | 1 |       | 0.00  |   |   |
| Q8N5G0 | Small integral membrane protein 20 C    | 0.00  |       |   |   | 5.04  | 13.10 | 1 | 1 |       | 0.00  |   |   |
| Q9NR45 | Sialic acid synthase OS=H               | 8.84  | 5.01  | 1 | 2 | 4.21  | 3.90  | 1 | 1 | 4.69  | 4.18  | 1 | 1 |
| P54105 | Methylosome subunit pICln OS=Homc       | 0.00  |       |   |   | 5.79  | 13.08 | 1 | 1 |       | 0.00  |   |   |
| P62854 | 40S ribosomal protein S2                | 3.92  | 13.04 | 1 | 1 |       | 0.00  |   |   |       |       |   |   |
| P31150 | Rab GDP dissociation inhi               | 28.89 | 12.98 | 4 | 5 | 27.41 | 12.98 | 4 | 5 | 25.61 | 12.98 | 4 | 5 |
| P62942 | Peptidyl-prolyl cis-trans is            | 9.76  | 12.96 | 1 | 2 |       | 0.00  |   |   | 4.25  | 12.96 | 1 | 1 |
| O43390 | Heterogeneous nuclear ri                | 12.52 | 7.90  | 3 | 3 | 8.95  | 4.42  | 2 | 2 | 8.86  | 4.74  | 2 | 2 |
| P53396 | ATP-citrate synthase OS=                | 32.14 | 10.17 | 7 | 7 | 34.01 | 8.81  | 6 | 7 | 18.84 | 5.81  | 4 | 4 |
| P28066 | Proteasome subunit alpha                | 4.50  | 4.98  | 1 | 1 | 4.62  | 4.98  | 1 | 1 | 4.97  | 7.88  | 1 | 1 |
| Q9GZT3 | SRA stem-loop-interacting RNA-bindin    | 0.00  |       |   |   | 4.92  | 12.84 | 1 | 1 |       | 0.00  |   |   |
| Q9Y2Q9 | 28S ribosomal protein S2                | 5.14  | 12.83 | 1 | 1 | 5.22  | 12.83 | 1 | 1 |       | 0.00  |   |   |
| P43686 | 26S protease regulatory s               | 4.78  | 4.78  | 1 | 1 | 5.77  | 7.89  | 1 | 1 | 11.87 | 7.89  | 1 | 2 |
| Q8N5N7 | 39S ribosomal protein L5                | 4.31  | 12.66 | 1 | 1 | 4.02  | 12.66 | 1 | 1 |       | 0.00  |   |   |
| Q9H3Z4 | DnaJ homolog subfamily C member 5       | 0.00  |       |   |   | 5.32  | 12.63 | 1 | 1 |       | 0.00  |   |   |
| P62805 | Histone H4 OS=Homo sa                   | 9.54  | 12.62 | 2 | 2 |       | 0.00  |   |   | 5.36  | 12.62 | 1 | 1 |
| O76070 | Gamma-synuclein OS=Ho                   | 4.67  | 12.60 | 1 | 1 | 3.95  | 12.60 | 1 | 1 |       |       |   |   |
| O43776 | Asparagine--tRNA ligase,                | 17.79 | 9.31  | 3 | 4 |       | 0.00  |   |   | 18.56 | 10.40 | 3 | 4 |
| O96005 | Cleft lip and palate transr             | 4.93  | 3.29  | 1 | 1 | 5.34  | 3.29  | 1 | 1 | 10.98 | 9.27  | 2 | 2 |
| Q14247 | Src substrate cortactin OS              | 16.79 | 12.55 | 3 | 3 | 9.46  | 6.73  | 2 | 2 | 19.53 | 6.73  | 2 | 4 |
| Q13158 | FAS-associated death domain protein     | 0.00  |       |   |   | 5.44  | 12.50 | 1 | 1 |       | 0.00  |   |   |
| Q8TCD5 | 5'(3')-deoxyribonucleotidase, cytosolic | 0.00  |       |   |   | 4.76  | 12.44 | 1 | 1 | 5.22  | 12.44 | 1 | 1 |

|        |                                          |       |       |   |   |       |       |   |   |       |       |   |    |
|--------|------------------------------------------|-------|-------|---|---|-------|-------|---|---|-------|-------|---|----|
| Q9NX24 | H/ACA ribonucleoprotein                  | 5.50  | 12.42 | 1 | 1 | 9.29  | 12.42 | 1 | 2 | 5.44  | 12.42 | 1 | 1  |
| O75312 | Zinc finger protein ZPR1 OS=Homo sa      | 0.00  |       |   |   | 4.43  | 3.05  | 1 | 1 | 10.09 | 9.37  | 2 | 2  |
| O60739 | Eukaryotic translation init              | 4.02  | 12.39 | 1 | 1 |       | 0.00  |   |   |       | 0.00  |   |    |
| Q96LD1 | Zeta-sarcoglycan OS=Homo                 | 5.61  | 12.37 | 1 | 1 |       | 0.00  |   |   |       | 0.00  |   |    |
| P13639 | Elongation factor 2 OS=Homo              | 30.37 | 8.62  | 4 | 6 | 29.80 | 9.09  | 4 | 6 | 50.82 | 11.31 | 6 | 10 |
| P68104 | Elongation factor 1-alpha                | 11.82 | 7.14  | 2 | 2 | 9.99  | 12.12 | 2 | 2 | 6.12  | 6.93  | 1 | 1  |
| P04040 | Catalase OS=Homo sapiens GN=CAT          | 0.00  |       |   |   | 9.87  | 8.35  | 2 | 2 | 4.12  | 3.98  | 1 | 1  |
| P00387 | NADH-cytochrome b5 rec                   | 5.40  | 5.98  | 1 | 1 | 9.42  | 12.29 | 2 | 2 | 9.29  | 12.29 | 2 | 2  |
| P49368 | T-complex protein 1 subu                 | 13.90 | 10.09 | 3 | 3 | 9.04  | 5.87  | 2 | 2 |       | 0.00  |   |    |
| Q9NRF9 | DNA polymerase epsilon subunit 3 OS      | 0.00  |       |   |   |       | 0.00  |   |   | 4.70  | 12.24 | 1 | 1  |
| P50990 | T-complex protein 1 subu                 | 17.14 | 10.04 | 4 | 4 | 8.91  | 4.93  | 2 | 2 | 13.59 | 7.48  | 3 | 3  |
| P28482 | Mitogen-activated proteir                | 9.34  | 12.22 | 2 | 2 |       | 0.00  |   |   | 5.10  | 4.17  | 1 | 1  |
| Q13561 | Dynactin subunit 2 OS=Homo               | 9.39  | 8.23  | 2 | 2 | 3.93  | 3.99  | 1 | 1 | 5.39  | 4.49  | 1 | 1  |
| Q14011 | Cold-inducible RNA-bindir                | 4.81  | 12.21 | 1 | 1 | 4.07  | 12.21 | 1 | 1 | 5.26  | 12.21 | 1 | 1  |
| Q96FW1 | Ubiquitin thioesterase OTUB1 OS=Homo     | 0.00  |       |   |   | 9.64  | 5.54  | 1 | 2 | 12.80 | 12.18 | 2 | 3  |
| Q9UQ80 | Proliferation-associated p               | 4.25  | 3.30  | 1 | 1 | 8.64  | 7.87  | 2 | 2 | 14.38 | 8.88  | 2 | 3  |
| Q9H4A4 | Aminopeptidase B OS=Homo                 | 8.76  | 4.62  | 2 | 2 | 9.06  | 4.77  | 2 | 2 | 4.43  | 2.77  | 1 | 1  |
| P20290 | Transcription factor BTF3 OS=Homo s      | 0.00  |       |   |   |       | 0.00  |   |   | 4.60  | 12.14 | 1 | 1  |
| P06493 | Cyclin-dependent kinase                  | 4.83  | 6.73  | 1 | 1 | 4.25  | 5.39  | 1 | 1 | 9.02  | 12.12 | 2 | 2  |
| P48147 | Prolyl endopeptidase OS=Homo             | 18.73 | 9.86  | 4 | 4 | 4.92  | 2.39  | 1 | 1 | 15.04 | 7.75  | 3 | 3  |
| P04181 | Ornithine aminotransfera                 | 9.90  | 4.56  | 1 | 2 | 5.67  | 4.56  | 1 | 1 | 10.92 | 12.07 | 2 | 2  |
| Q96DA6 | Mitochondrial import inner membrane      | 0.00  |       |   |   |       | 0.00  |   |   | 4.17  | 12.07 | 1 | 1  |
| P52597 | Heterogeneous nuclear ri                 | 15.29 | 12.05 | 3 | 3 | 15.33 | 12.05 | 3 | 3 | 15.92 | 7.95  | 2 | 3  |
| P04844 | Dolichyl-diphosphooligosac               | 22.39 | 9.35  | 4 | 5 | 13.52 | 7.13  | 3 | 3 | 13.60 | 7.61  | 3 | 3  |
| P62330 | ADP-ribosylation factor 6                | 4.09  | 12.00 | 1 | 1 |       | 0.00  |   |   |       | 0.00  |   |    |
| Q99733 | Nucleosome assembly pro                  | 16.22 | 12.00 | 2 | 3 |       | 0.00  |   |   | 10.64 | 12.00 | 2 | 2  |
| Q9NRX4 | 14 kDa phosphohistidine phosphatase      | 0.00  |       |   |   | 4.15  | 12.00 | 1 | 1 |       | 0.00  |   |    |
| Q15717 | ELAV-like protein 1 OS=Homo sapiens      | 0.00  |       |   |   | 3.96  | 4.29  | 1 | 1 | 10.11 | 11.96 | 2 | 2  |
| Q14116 | Interleukin-18 OS=Homo sapiens GN=       | 0.00  |       |   |   |       | 0.00  |   |   | 5.79  | 11.92 | 1 | 1  |
| P39023 | 60S ribosomal protein L3                 | 5.12  | 5.96  | 1 | 1 | 10.82 | 6.45  | 2 | 2 | 15.30 | 11.91 | 3 | 3  |
| O60814 | Histone H2B type 1-K OS=Homo             | 5.10  | 11.90 | 1 | 1 | 5.13  | 11.90 | 1 | 1 | 5.20  | 11.90 | 1 | 1  |
| P05026 | Sodium/potassium-transp                  | 10.00 | 8.25  | 1 | 2 | 9.73  | 11.88 | 2 | 2 | 16.64 | 8.25  | 1 | 3  |
| P49591 | Serine--tRNA ligase, cytoplasmic OS=Homo | 0.00  |       |   |   | 4.77  | 5.45  | 1 | 1 | 9.35  | 6.42  | 2 | 2  |
| Q9UJU6 | Drebrin-like protein OS=Homo             | 10.31 | 8.37  | 2 | 2 | 4.95  | 3.72  | 1 | 1 | 9.32  | 7.21  | 2 | 2  |
| P09382 | Galectin-1 OS=Homo sapiens               | 4.34  | 11.85 | 1 | 1 | 4.09  | 11.85 | 1 | 1 |       | 0.00  |   |    |
| P61289 | Proteasome activator con                 | 3.90  | 5.91  | 1 | 1 | 4.97  | 5.91  | 1 | 1 | 4.81  | 5.91  | 1 | 1  |
| P31040 | Succinate dehydrogenase                  | 15.07 | 11.75 | 3 | 3 | 14.42 | 11.75 | 3 | 3 | 11.02 | 6.63  | 2 | 2  |
| P16403 | Histone H1.2 OS=Homo sapiens             | 4.35  | 5.63  | 1 | 1 | 8.05  | 11.74 | 2 | 2 | 13.95 | 11.74 | 2 | 3  |
| Q96AG4 | Leucine-rich repeat-containing protein   | 0.00  |       |   |   |       | 0.00  |   |   | 11.57 | 11.73 | 2 | 2  |

|        |                                        |       |       |   |   |       |       |   |   |       |       |   |   |
|--------|----------------------------------------|-------|-------|---|---|-------|-------|---|---|-------|-------|---|---|
| Q9UI09 | NADH dehydrogenase [ul                 | 4.23  | 11.72 | 1 | 1 |       | 0.00  |   |   |       | 0.00  |   |   |
| Q15056 | Eukaryotic translation init            | 5.63  | 11.69 | 1 | 1 |       | 0.00  |   |   |       | 0.00  |   |   |
| Q96QK1 | Vacuolar protein sorting-z             | 16.67 | 5.65  | 3 | 4 | 18.44 | 5.65  | 3 | 4 | 15.29 | 6.16  | 3 | 3 |
| P17858 | ATP-dependent 6-phosph                 | 19.44 | 7.18  | 3 | 4 | 13.56 | 7.56  | 3 | 3 | 18.74 | 9.36  | 4 | 4 |
| Q92598 | Heat shock protein 105 k               | 24.98 | 7.93  | 4 | 5 | 18.34 | 7.58  | 4 | 4 | 26.58 | 8.04  | 4 | 5 |
| P17980 | 26S protease regulatory s              | 12.93 | 11.62 | 3 | 3 | 4.93  | 4.33  | 1 | 1 | 18.60 | 11.62 | 3 | 4 |
| Q9NR31 | GTP-binding protein SAR:               | 4.70  | 11.62 | 1 | 1 |       | 0.00  |   |   | 4.30  | 11.62 | 1 | 1 |
| P23434 | Glycine cleavage system                | 5.32  | 11.56 | 1 | 1 | 4.01  | 11.56 | 1 | 1 | 5.17  | 11.56 | 1 | 1 |
| Q12931 | Heat shock protein 75 kD               | 13.70 | 9.66  | 3 | 3 | 12.72 | 3.84  | 2 | 3 | 9.76  | 3.84  | 2 | 2 |
| P30040 | Endoplasmic reticulum re               | 12.68 | 11.49 | 2 | 3 | 4.27  | 5.75  | 1 | 1 | 4.64  | 5.75  | 1 | 1 |
| Q14376 | UDP-glucose 4-epimerase                | 17.58 | 11.49 | 2 | 3 | 5.64  | 5.46  | 1 | 1 | 11.31 | 11.49 | 2 | 2 |
| Q7Z4W1 | L-xylulose reductase OS=               | 5.90  | 11.48 | 1 | 1 |       | 0.00  |   |   | 6.92  | 11.48 | 1 | 1 |
| O75937 | DnaJ homolog subfamily C member 8      |       | 0.00  |   |   |       | 0.00  |   |   | 5.53  | 11.46 | 1 | 1 |
| Q9NX63 | MICOS complex subunit M                | 8.37  | 11.45 | 2 | 2 |       | 0.00  |   |   | 4.39  | 6.61  | 1 | 1 |
| Q9H4M9 | EH domain-containing pro               | 13.71 | 11.42 | 3 | 3 | 9.68  | 8.99  | 2 | 2 | 4.93  | 2.81  | 1 | 1 |
| Q9NQ55 | Suppressor of SWI4 1 ho                | 5.10  | 7.82  | 1 | 1 | 4.29  | 3.59  | 1 | 1 |       | 0.00  |   |   |
| P10109 | Adrenodoxin, mitochondrial OS=Homo     |       | 0.00  |   |   |       | 0.00  |   |   | 4.42  | 11.41 | 1 | 1 |
| P21291 | Cysteine and glycine-rich              | 4.54  | 11.40 | 1 | 1 | 4.59  | 11.40 | 1 | 1 | 4.64  | 11.40 | 1 | 1 |
| P24666 | Low molecular weight ph                | 9.40  | 11.39 | 1 | 2 | 5.57  | 11.39 | 1 | 1 | 8.88  | 11.39 | 1 | 2 |
| O75489 | NADH dehydrogenase [ul                 | 3.93  | 4.92  | 1 | 1 | 4.39  | 6.44  | 1 | 1 | 4.48  | 4.92  | 1 | 1 |
| Q9NTK5 | Obg-like ATPase 1 OS=H                 | 12.94 | 11.36 | 3 | 3 | 4.24  | 3.79  | 1 | 1 | 4.23  | 3.79  | 1 | 1 |
| Q14166 | Tubulin--tyrosine ligase-li            | 3.93  | 2.02  | 1 | 1 |       | 0.00  |   |   | 15.11 | 9.32  | 3 | 3 |
| O75367 | Core histone macro-H2A.                | 5.57  | 5.91  | 1 | 1 | 5.28  | 5.91  | 1 | 1 | 15.20 | 11.29 | 2 | 3 |
| Q96C86 | m7GpppX diphosphatase                  | 4.21  | 5.64  | 1 | 1 | 5.07  | 5.64  | 1 | 1 | 5.63  | 5.64  | 1 | 1 |
| P20839 | Inosine-5'-monophosphat                | 11.19 | 5.06  | 1 | 2 | 4.20  | 2.33  | 1 | 1 | 12.29 | 8.95  | 2 | 2 |
| P62847 | 40S ribosomal protein S2               | 4.07  | 11.28 | 1 | 1 |       | 0.00  |   |   |       | 0.00  |   |   |
| Q15366 | Poly(rC)-binding protein z             | 9.58  | 5.48  | 1 | 2 | 4.99  | 5.48  | 1 | 1 | 14.10 | 11.23 | 2 | 3 |
| Q5JTJ3 | Cytochrome c oxidase ass               | 4.07  | 11.20 | 1 | 1 |       | 0.00  |   |   |       | 0.00  |   |   |
| P62899 | 60S ribosomal protein L31 OS=Homo      |       | 0.00  |   |   | 3.97  | 11.20 | 1 | 1 |       | 0.00  |   |   |
| Q9UI30 | Multifunctional methyltransferase subu |       | 0.00  |   |   | 4.54  | 11.20 | 1 | 1 | 5.29  | 11.20 | 1 | 1 |
| Q9NQP4 | Prefoldin subunit 4 OS=H               | 4.17  | 11.19 | 1 | 1 | 4.41  | 11.19 | 1 | 1 |       | 0.00  |   |   |
| P38606 | V-type proton ATPase cat               | 18.46 | 7.78  | 3 | 4 | 10.44 | 6.32  | 2 | 2 | 12.21 | 6.32  | 2 | 2 |
| Q9Y6M9 | NADH dehydrogenase [ubiquinone] 1      |       | 0.00  |   |   |       | 0.00  |   |   | 4.13  | 11.17 | 1 | 1 |
| O14745 | Na(+)/H(+) exchange re                 | 16.63 | 7.26  | 1 | 3 | 13.98 | 11.17 | 2 | 3 | 10.36 | 7.26  | 1 | 2 |
| Q01518 | Adenylyl cyclase-associat              | 13.89 | 11.16 | 3 | 3 | 5.06  | 3.79  | 1 | 1 | 4.34  | 3.79  | 1 | 1 |
| Q13501 | Sequestosome-1 OS=Homo sapiens G       |       | 0.00  |   |   | 5.29  | 3.41  | 1 | 1 | 11.39 | 11.14 | 2 | 2 |
| Q14157 | Ubiquitin-associated prote             | 19.09 | 8.28  | 4 | 4 | 4.55  | 1.75  | 1 | 1 | 17.88 | 6.44  | 4 | 4 |
| O14602 | Eukaryotic translation init            | 4.07  | 11.11 | 1 | 1 |       | 0.00  |   |   |       | 0.00  |   |   |
| P00491 | Purine nucleoside phosph               | 7.95  | 11.07 | 2 | 2 | 4.54  | 5.88  | 1 | 1 | 4.20  | 5.88  | 1 | 1 |

|        |                                          |       |       |   |   |       |       |   |   |       |       |   |   |
|--------|------------------------------------------|-------|-------|---|---|-------|-------|---|---|-------|-------|---|---|
| Q99832 | T-complex protein 1 subu                 | 21.60 | 11.05 | 3 | 4 | 16.59 | 8.47  | 2 | 3 | 16.74 | 6.63  | 2 | 3 |
| P36578 | 60S ribosomal protein L4                 | 7.87  | 8.43  | 2 | 2 | 8.37  | 5.85  | 2 | 2 | 4.35  | 5.15  | 1 | 1 |
| Q7L5L3 | Glycerophosphodiester pl                 | 11.14 | 6.60  | 1 | 2 | 6.10  | 6.60  | 1 | 1 | 10.16 | 11.01 | 2 | 2 |
| P52209 | 6-phosphogluconate dehy                  | 9.00  | 8.07  | 2 | 2 | 10.36 | 7.04  | 2 | 2 | 6.13  | 3.93  | 1 | 1 |
| P0C0S5 | Histone H2A.Z OS=Homo sapiens GN-        | 0.00  |       |   |   | 4.08  | 10.94 | 1 | 1 | 4.19  | 10.94 | 1 | 1 |
| Q9Y5S9 | RNA-binding protein 8A OS=Homo saj       | 0.00  |       |   |   |       | 0.00  |   |   | 4.13  | 10.92 | 1 | 1 |
| P62424 | 60S ribosomal protein L7                 | 8.98  | 10.90 | 2 | 2 | 9.33  | 10.90 | 2 | 2 |       | 0.00  |   |   |
| Q04760 | Lactoylglutathione lyase (               | 5.14  | 10.87 | 1 | 1 | 5.92  | 10.87 | 1 | 1 | 5.90  | 10.87 | 1 | 1 |
| Q9HCN8 | Stromal cell-derived factor 2-like prote | 0.00  |       |   |   |       | 0.00  |   |   | 5.26  | 10.86 | 1 | 1 |
| O15212 | Prefoldin subunit 6 OS=Homo sapiens      | 0.00  |       |   |   |       | 0.00  |   |   | 4.77  | 10.85 | 1 | 1 |
| P18206 | Vinculin OS=Homo sapien                  | 27.52 | 8.47  | 5 | 5 | 20.43 | 6.17  | 4 | 4 | 25.41 | 6.79  | 4 | 5 |
| P50897 | Palmitoyl-protein thioeste               | 8.40  | 10.78 | 2 | 2 | 4.92  | 5.88  | 1 | 1 | 5.07  | 5.88  | 1 | 1 |
| P61923 | Coatomer subunit zeta-1 OS=Homo sa       | 0.00  |       |   |   |       | 0.00  |   |   | 4.72  | 10.73 | 1 | 1 |
| O75817 | Ribonuclease P protein su                | 4.20  | 10.71 | 1 | 1 |       |       |   |   |       |       |   |   |
| P62829 | 60S ribosomal protein L2                 | 4.13  | 10.71 | 1 | 1 |       | 0.00  |   |   | 4.58  | 10.71 | 1 | 1 |
| O95433 | Activator of 90 kDa heat                 | 4.23  | 4.14  | 1 | 1 |       | 0.00  |   |   | 4.82  | 6.51  | 1 | 1 |
| P61803 | Dolichyl-diphosphooligosa                | 4.06  | 10.62 | 1 | 1 |       | 0.00  |   |   |       |       |   |   |
| P15170 | Eukaryotic peptide chain                 | 8.57  | 5.61  | 2 | 2 | 8.94  | 7.41  | 2 | 2 |       | 0.00  |   |   |
| Q13630 | GDP-L-fucose synthase O                  | 4.11  | 4.67  | 1 | 1 | 3.99  | 5.92  | 1 | 1 |       | 0.00  |   |   |
| P20700 | Lamin-B1 OS=Homo sapi                    | 18.85 | 10.58 | 4 | 4 | 9.52  | 4.95  | 2 | 2 | 9.09  | 5.12  | 2 | 2 |
| Q14444 | Caprin-1 OS=Homo sapiens GN=CAPP         | 0.00  |       |   |   |       | 0.00  |   |   | 13.43 | 10.58 | 3 | 3 |
| P00390 | Glutathione reductase, m                 | 9.40  | 10.54 | 2 | 2 |       | 0.00  |   |   | 6.00  | 6.51  | 1 | 1 |
| P19105 | Myosin regulatory light ch               | 4.97  | 10.53 | 1 | 1 | 5.07  | 10.53 | 1 | 1 | 5.28  | 10.53 | 1 | 1 |
| P12268 | Inosine-5'-monophospat                   | 4.70  | 2.92  | 1 | 1 |       | 0.00  |   |   | 13.55 | 10.51 | 3 | 3 |
| O00422 | Histone deacetylase comp                 | 4.39  | 10.46 | 1 | 1 |       | 0.00  |   |   | 4.85  | 10.46 | 1 | 1 |
| Q9P2J5 | Leucine--tRNA ligase, cyt                | 26.25 | 9.18  | 6 | 6 | 12.77 | 4.00  | 3 | 3 | 25.76 | 6.80  | 4 | 5 |
| P62888 | 60S ribosomal protein L3                 | 4.28  | 10.43 | 1 | 1 |       | 0.00  |   |   |       | 0.00  |   |   |
| Q16851 | UTP--glucose-1-phospat                   | 9.78  | 6.89  | 2 | 2 | 5.12  | 3.94  | 1 | 1 | 9.81  | 7.48  | 2 | 2 |
| Q07812 | Apoptosis regulator BAX (                | 4.71  | 10.42 | 1 | 1 |       | 0.00  |   |   | 4.54  | 10.42 | 1 | 1 |
| Q02878 | 60S ribosomal protein L6                 | 4.03  | 4.51  | 1 | 1 |       | 0.00  |   |   | 4.49  | 5.90  | 1 | 1 |
| P62995 | Transformer-2 protein ho                 | 9.31  | 4.86  | 1 | 2 |       | 0.00  |   |   | 5.23  | 5.56  | 1 | 1 |
| P36542 | ATP synthase subunit gar                 | 5.27  | 10.40 | 1 | 1 |       | 0.00  |   |   |       | 0.00  |   |   |
| Q9GZL7 | Ribosome biogenesis pro                  | 4.94  | 4.49  | 1 | 1 |       | 0.00  |   |   | 5.16  | 5.91  | 1 | 1 |
| P05452 | Tetranectin OS=Homo sa                   | 4.84  | 10.40 | 1 | 1 | 4.56  | 10.40 | 1 | 1 | 4.16  | 10.40 | 1 | 1 |
| P35998 | 26S protease regulatory s                | 4.67  | 4.39  | 1 | 1 | 8.68  | 6.00  | 2 | 2 | 9.55  | 4.39  | 1 | 2 |
| O14828 | Secretory carrier-associat               | 9.71  | 4.61  | 1 | 2 | 10.09 | 4.61  | 1 | 2 | 19.37 | 10.37 | 2 | 4 |
| P17900 | Ganglioside GM2 activator OS=Homo        | 0.00  |       |   |   | 4.67  | 10.36 | 1 | 1 |       | 0.00  |   |   |
| Q86X59 | Putative uncharacterized protein C17c    | 0.00  |       |   |   | 4.94  | 10.36 | 1 | 1 |       | 0.00  |   |   |
| P39019 | 40S ribosomal protein S1                 | 5.07  | 10.34 | 1 | 1 |       | 0.00  |   |   |       | 0.00  |   |   |

|        |                                        |       |       |   |   |       |       |   |       |       |       |   |   |
|--------|----------------------------------------|-------|-------|---|---|-------|-------|---|-------|-------|-------|---|---|
| Q9BRT2 | Ubiquinol-cytochrome-c reductase con   | 0.00  |       |   |   | 0.00  |       |   | 4.54  | 10.32 | 1     | 1 |   |
| P00568 | Adenylate kinase isoenzyme 1 OS=Ho     | 0.00  |       |   |   | 0.00  |       |   | 4.62  | 10.31 | 1     | 1 |   |
| Q99426 | Tubulin-folding cofactor E             | 4.57  | 10.25 | 1 | 1 | 0.00  |       |   |       | 0.00  |       |   |   |
| Q7Z2W9 | 39S ribosomal protein L21, mitochond   | 0.00  |       |   |   | 0.00  |       |   | 4.10  | 10.24 | 1     | 1 |   |
| P49748 | Very long-chain specific a             | 14.32 | 10.23 | 3 | 3 | 3.94  | 3.66  | 1 | 1     | 4.46  | 3.66  | 1 | 1 |
| O75439 | Mitochondrial-processing               | 10.59 | 10.22 | 2 | 2 |       | 0.00  |   | 11.22 | 10.22 | 2     | 2 |   |
| O95169 | NADH dehydrogenase [ul                 | 4.48  | 10.22 | 1 | 1 |       | 0.00  |   | 4.57  | 10.22 | 1     | 1 |   |
| Q6XQN6 | Nicotinate phosphoribosy               | 9.57  | 7.62  | 2 | 2 | 4.52  | 2.60  | 1 | 1     |       | 0.00  |   |   |
| Q15370 | Transcription elongation factor B poly | 0.00  |       |   |   | 4.16  | 10.17 | 1 | 1     |       | 0.00  |   |   |
| P11766 | Alcohol dehydrogenase cl               | 4.72  | 4.28  | 1 | 1 | 5.08  | 5.88  | 1 | 1     | 4.51  | 4.28  | 1 | 1 |
| P60900 | Proteasome subunit alpha               | 3.85  | 4.88  | 1 | 1 | 4.15  | 5.28  | 1 | 1     |       | 0.00  |   |   |
| P35268 | 60S ribosomal protein L22 OS=Homo      | 0.00  |       |   |   | 3.93  | 10.16 | 1 | 1     |       | 0.00  |   |   |
| O60869 | Endothelial differentiation            | 4.74  | 10.14 | 1 | 1 | 9.13  | 10.14 | 1 | 2     |       | 0.00  |   |   |
| P61966 | AP-1 complex subunit sigma-1A OS=H     | 0.00  |       |   |   | 4.64  | 10.13 | 1 | 1     | 5.19  | 10.13 | 1 | 1 |
| P40763 | Signal transducer and act              | 24.98 | 8.44  | 4 | 5 | 10.61 | 3.77  | 2 | 2     | 14.53 | 5.45  | 3 | 3 |
| Q00610 | Clathrin heavy chain 1 OS              | 47.42 | 8.48  | 8 | 9 | 41.21 | 5.97  | 5 | 8     | 37.30 | 7.46  | 6 | 7 |
| O75436 | Vacuolar protein sorting-z             | 8.70  | 10.09 | 2 | 2 |       | 0.00  |   |       | 0.00  |       |   |   |
| Q9Y508 | E3 ubiquitin-protein ligase            | 9.37  | 10.09 | 1 | 2 |       | 0.00  |   | 9.49  | 10.09 | 1     | 2 |   |
| O43684 | Mitotic checkpoint proteir             | 4.00  | 5.79  | 1 | 1 | 3.95  | 4.27  | 1 | 1     | 4.29  | 4.27  | 1 | 1 |
| O95747 | Serine/threonine-protein               | 9.02  | 6.26  | 2 | 2 | 15.47 | 10.06 | 3 | 3     | 11.45 | 7.40  | 2 | 2 |
| Q03154 | Aminoacylase-1 OS=Homo                 | 4.46  | 4.41  | 1 | 1 | 4.70  | 5.64  | 1 | 1     |       | 0.00  |   |   |
| P00367 | Glutamate dehydrogenas                 | 4.45  | 3.41  | 1 | 1 | 13.46 | 10.04 | 3 | 3     | 4.37  | 3.41  | 1 | 1 |
| P20810 | Calpastatin OS=Homo sa                 | 14.76 | 10.03 | 3 | 3 | 9.54  | 6.64  | 2 | 2     | 5.80  | 3.39  | 1 | 1 |
| Q6GMV3 | Putative peptidyl-tRNA hydrolase PTRI  | 0.00  |       |   |   | 3.95  | 10.00 | 1 | 1     | 4.36  | 10.00 | 1 | 1 |
| Q12849 | G-rich sequence factor 1               | 5.59  | 4.17  | 1 | 1 | 6.01  | 4.17  | 1 | 1     | 4.96  | 5.83  | 1 | 1 |
| O60506 | Heterogeneous nuclear ri               | 9.88  | 5.14  | 2 | 2 | 9.82  | 3.37  | 2 | 2     | 25.75 | 8.99  | 3 | 5 |
| P26440 | Isovaleryl-CoA dehydroge               | 4.30  | 4.02  | 1 | 1 |       | 0.00  |   | 5.12  | 5.91  | 1     | 1 |   |
| P19013 | Keratin, type II cytoskele             | 13.37 | 7.68  | 3 | 3 | 13.79 | 7.30  | 3 | 3     | 9.46  | 3.00  | 1 | 2 |
| P35249 | Replication factor C subu              | 3.84  | 4.41  | 1 | 1 |       | 0.00  |   | 6.03  | 5.51  | 1     | 1 |   |
| P11413 | Glucose-6-phosphate 1-d                | 9.54  | 6.02  | 2 | 2 | 4.19  | 2.91  | 1 | 1     | 9.40  | 6.99  | 2 | 2 |
| P32969 | 60S ribosomal protein L9 OS=Homo s     | 0.00  |       |   |   | 5.48  | 9.90  | 1 | 1     | 5.24  | 9.90  | 1 | 1 |
| P61088 | Ubiquitin-conjugating enzyme E2 N O:   | 0.00  |       |   |   | 4.05  | 9.87  | 1 | 1     |       | 0.00  |   |   |
| P00711 | Alpha-lactalbumin - Bos t              | 5.20  | 9.86  | 1 | 1 |       | 0.00  |   | 5.55  | 9.86  | 1     | 1 |   |
| P14314 | Glucosidase 2 subunit be               | 8.61  | 6.25  | 2 | 2 | 8.23  | 6.25  | 2 | 2     | 14.48 | 9.85  | 3 | 3 |
| Q96EY4 | Translation machinery-as               | 9.13  | 9.85  | 1 | 2 | 4.36  | 9.85  | 1 | 1     | 4.19  | 9.85  | 1 | 1 |
| Q9BX68 | Histidine triad nucleotide-            | 3.85  | 9.82  | 1 | 1 |       | 0.00  |   |       | 0.00  |       |   |   |
| P56537 | Eukaryotic translation init            | 4.76  | 9.80  | 1 | 1 |       | 0.00  |   | 4.26  | 9.80  | 1     | 1 |   |
| P46782 | 40S ribosomal protein S5               | 4.48  | 9.80  | 1 | 1 | 10.27 | 9.80  | 1 | 2     | 5.50  | 9.80  | 1 | 1 |
| Q96EK6 | Glucosamine 6-phosphate N-acetyltra    | 0.00  |       |   |   |       | 0.00  |   | 4.57  | 9.78  | 1     | 1 |   |

|        |                                         |       |      |    |    |       |      |    |    |       |      |    |    |
|--------|-----------------------------------------|-------|------|----|----|-------|------|----|----|-------|------|----|----|
| Q99471 | Prefoldin subunit 5 OS=H                | 4.33  | 9.74 | 1  | 1  | 4.45  | 9.74 | 1  | 1  | 4.24  | 9.74 | 1  | 1  |
| P25685 | DnaJ homolog subfamily B member 1       |       | 0.00 |    |    | 8.51  | 9.71 | 2  | 2  |       | 0.00 |    |    |
| P14625 | Endoplasmic reticulum protein OS=Homo s | 22.42 | 7.35 | 4  | 5  | 19.76 | 8.34 | 4  | 4  | 24.36 | 8.34 | 4  | 5  |
| P11233 | Ras-related protein Ral-A               | 5.83  | 9.71 | 1  | 1  | 4.95  | 9.71 | 1  | 1  | 5.25  | 9.71 | 1  | 1  |
| P00374 | Dihydrofolate reductase (C              | 5.56  | 9.63 | 1  | 1  |       | 0.00 |    |    | 5.47  | 9.63 | 1  | 1  |
| P23921 | Ribonucleoside-diphosph                 | 12.22 | 7.70 | 2  | 2  | 15.62 | 9.60 | 3  | 3  | 27.23 | 9.60 | 3  | 5  |
| P42704 | Leucine-rich PPR motif-cc               | 27.59 | 7.39 | 6  | 6  | 14.45 | 3.59 | 3  | 3  | 10.12 | 2.15 | 2  | 2  |
| Q15149 | Plectin OS=Homo sapiens                 | 59.02 | 4.53 | 12 | 12 | 55.35 | 4.21 | 11 | 11 | 87.35 | 6.30 | 16 | 18 |
| Q9NQG5 | Regulation of nuclear pre               | 8.22  | 9.51 | 2  | 2  | 4.08  | 4.60 | 1  | 1  | 9.18  | 9.51 | 2  | 2  |
| O00762 | Ubiquitin-conjugating enz               | 4.29  | 9.50 | 1  | 1  | 4.70  | 9.50 | 1  | 1  |       | 0.00 |    |    |
| Q9Y490 | Talin-1 OS=Homo sapien                  | 49.59 | 6.14 | 8  | 10 | 31.26 | 4.88 | 6  | 6  | 48.40 | 6.45 | 8  | 9  |
| P02668 | Kappa-casein [Contains: v               | 5.30  | 9.47 | 1  | 1  | 5.56  | 9.47 | 1  | 1  | 5.06  | 9.47 | 1  | 1  |
| O43488 | Aflatoxin B1 aldehyde rec               | 4.89  | 4.18 | 1  | 1  | 7.97  | 9.47 | 2  | 2  | 9.06  | 9.47 | 2  | 2  |
| P53004 | Biliverdin reductase A OS               | 8.21  | 9.46 | 2  | 2  |       | 0.00 |    |    |       | 0.00 |    |    |
| Q8WUM4 | Programmed cell death 6                 | 18.87 | 6.80 | 4  | 4  | 25.52 | 5.99 | 3  | 5  | 13.83 | 6.34 | 3  | 3  |
| P47914 | 60S ribosomal protein L29 OS=Homo       |       | 0.00 |    |    |       | 0.00 |    |    | 4.15  | 9.43 | 1  | 1  |
| Q92552 | 28S ribosomal protein S27, mitochond    |       | 0.00 |    |    | 9.60  | 9.42 | 2  | 2  | 4.43  | 3.62 | 1  | 1  |
| Q16576 | Histone-binding protein R               | 9.50  | 9.41 | 2  | 2  | 9.96  | 9.41 | 2  | 2  |       | 0.00 |    |    |
| P57735 | Ras-related protein Rab-25 OS=Homo      |       | 0.00 |    |    |       | 0.00 |    |    | 4.91  | 9.39 | 1  | 1  |
| Q9ULC4 | Malignant T-cell-amplified sequence 1   |       | 0.00 |    |    |       | 0.00 |    |    | 4.23  | 9.39 | 1  | 1  |
| Q9Y3B7 | 39S ribosomal protein L1                | 4.15  | 9.38 | 1  | 1  |       | 0.00 |    |    | 5.36  | 9.38 | 1  | 1  |
| O14980 | Exportin-1 OS=Homo sap                  | 14.08 | 4.20 | 3  | 3  | 9.01  | 2.71 | 2  | 2  | 16.15 | 5.70 | 3  | 3  |
| P30042 | ES1 protein homolog, mitochondrial O    |       | 0.00 |    |    | 4.72  | 9.33 | 1  | 1  |       | 0.00 |    |    |
| O75348 | V-type proton ATPase sul                | 3.98  | 9.32 | 1  | 1  |       | 0.00 |    |    |       | 0.00 |    |    |
| Q9UNM6 | 26S proteasome non-ATPase regulato      |       | 0.00 |    |    |       | 0.00 |    |    | 9.14  | 9.31 | 2  | 2  |
| Q9H1Z9 | Tetraspanin-10 OS=Hom                   | 4.79  | 9.30 | 1  | 1  |       | 0.00 |    |    |       | 0.00 |    |    |
| Q12906 | Interleukin enhancer-bind               | 4.98  | 2.01 | 1  | 1  | 10.25 | 5.48 | 2  | 2  | 5.92  | 3.80 | 1  | 1  |
| P07195 | L-lactate dehydrogenase                 | 5.13  | 4.49 | 1  | 1  | 4.03  | 4.79 | 1  | 1  | 9.73  | 9.28 | 2  | 2  |
| Q9UGI8 | Testin OS=Homo sapiens                  | 9.44  | 9.26 | 2  | 2  |       | 0.00 |    |    | 5.27  | 5.23 | 1  | 1  |
| O43708 | Maleylacetoacetate isome                | 4.04  | 9.26 | 1  | 1  |       | 0.00 |    |    |       | 0.00 |    |    |
| P55786 | Puromycin-sensitive amin                | 5.11  | 2.94 | 1  | 1  | 13.41 | 6.31 | 3  | 3  | 4.33  | 1.85 | 1  | 1  |
| Q9HCC0 | Methylcrotonoyl-CoA car                 | 12.33 | 9.24 | 3  | 3  | 8.19  | 6.04 | 2  | 2  | 4.24  | 3.20 | 1  | 1  |
| O60682 | Musculin OS=Homo sapie                  | 3.87  | 9.22 | 1  | 1  |       | 0.00 |    |    |       | 0.00 |    |    |
| Q8N163 | Cell cycle and apoptosis r              | 16.45 | 9.21 | 3  | 3  | 11.41 | 5.96 | 2  | 2  | 5.11  | 3.58 | 1  | 1  |
| P31948 | Stress-induced-phosphop                 | 15.43 | 3.68 | 1  | 3  | 8.50  | 6.81 | 2  | 2  | 19.83 | 9.21 | 3  | 4  |
| O15258 | Protein RER1 OS=Homo sapiens GN=        |       | 0.00 |    |    | 4.22  | 9.18 | 1  | 1  |       | 0.00 |    |    |
| P13798 | Acylamino-acid-releasing                | 4.95  | 3.14 | 1  | 1  | 4.21  | 2.05 | 1  | 1  | 13.92 | 7.10 | 3  | 3  |
| Q9Y678 | Coatomer subunit gamma                  | 14.25 | 6.86 | 3  | 3  | 13.52 | 4.35 | 2  | 3  | 4.18  | 2.06 | 1  | 1  |
| Q13555 | Calcium/calmodulin-depe                 | 8.69  | 5.73 | 2  | 2  | 4.43  | 3.41 | 1  | 1  | 9.46  | 6.81 | 2  | 2  |

|        |                                        |       |      |   |   |       |      |   |   |       |      |   |   |
|--------|----------------------------------------|-------|------|---|---|-------|------|---|---|-------|------|---|---|
| Q12792 | Twinfilin-1 OS=Homo sap                | 9.05  | 9.14 | 2 | 2 | 4.81  | 5.43 | 1 | 1 | 4.91  | 5.43 | 1 | 1 |
| Q92945 | Far upstream element-bir               | 13.34 | 6.61 | 3 | 3 | 13.04 | 5.06 | 2 | 3 | 9.25  | 5.63 | 2 | 2 |
| O43583 | Density-regulated protein OS=Homo s    | 0.00  |      |   |   | 4.17  | 9.09 | 1 | 1 |       | 0.00 |   |   |
| Q9UHV9 | Prefoldin subunit 2 OS=Homo sapiens    | 0.00  |      |   |   | 3.93  | 9.09 | 1 | 1 | 4.13  | 9.09 | 1 | 1 |
| P30050 | 60S ribosomal protein L12 OS=Homo      | 0.00  |      |   |   |       | 0.00 |   |   | 9.55  | 9.09 | 1 | 2 |
| P46783 | 40S ribosomal protein S1               | 3.95  | 8.48 | 1 | 1 |       | 0.00 |   |   | 5.04  | 9.09 | 1 | 1 |
| P00441 | Superoxide dismutase [Cu-Zn] OS=Hc     | 0.00  |      |   |   | 4.06  | 9.09 | 1 | 1 | 4.26  | 9.09 | 1 | 1 |
| P82979 | SAP domain-containing ri               | 4.62  | 9.05 | 1 | 1 |       | 0.00 |   |   |       | 0.00 |   |   |
| P14651 | Homeobox protein Hox-B3 OS=Homo        | 0.00  |      |   |   | 4.78  | 9.05 | 1 | 1 |       | 0.00 |   |   |
| Q9BY77 | Polymerase delta-interact              | 4.08  | 4.51 | 1 | 1 | 5.12  | 4.51 | 1 | 1 |       | 0.00 |   |   |
| O00410 | Importin-5 OS=Homo sap                 | 24.11 | 7.75 | 4 | 5 | 9.69  | 3.74 | 2 | 2 | 19.04 | 4.38 | 3 | 4 |
| Q7Z406 | Myosin-14 OS=Homo sap                  | 28.12 | 4.81 | 6 | 6 | 19.35 | 3.31 | 4 | 4 | 34.57 | 5.06 | 7 | 7 |
| Q5TFE4 | 5'-nucleotidase domain-c               | 4.08  | 4.62 | 1 | 1 | 8.87  | 9.01 | 2 | 2 | 5.50  | 4.40 | 1 | 1 |
| O95782 | AP-2 complex subunit alp               | 5.10  | 2.76 | 1 | 1 | 14.77 | 6.24 | 3 | 3 | 15.36 | 6.24 | 3 | 3 |
| Q13084 | 39S ribosomal protein L2               | 12.23 | 8.98 | 1 | 2 | 5.80  | 8.98 | 1 | 1 | 5.06  | 8.98 | 1 | 1 |
| Q9BZE1 | 39S ribosomal protein L37, mitochond   | 0.00  |      |   |   | 4.17  | 3.78 | 1 | 1 | 5.02  | 5.20 | 1 | 1 |
| P04632 | Calpain small subunit 1 C              | 5.60  | 8.96 | 1 | 1 |       | 0.00 |   |   | 10.27 | 8.96 | 1 | 2 |
| P51570 | Galactokinase OS=Homo                  | 4.92  | 4.08 | 1 | 1 | 11.03 | 8.93 | 2 | 2 |       | 0.00 |   |   |
| Q86SX6 | Glutaredoxin-related protein 5, mitoch | 0.00  |      |   |   |       | 0.00 |   |   | 5.25  | 8.92 | 1 | 1 |
| P84095 | Rho-related GTP-binding                | 5.63  | 8.90 | 1 | 1 |       | 0.00 |   |   | 5.45  | 8.90 | 1 | 1 |
| O75934 | Pre-mRNA-splicing factor               | 4.42  | 8.89 | 1 | 1 |       | 0.00 |   |   |       | 0.00 |   |   |
| Q13442 | 28 kDa heat- and acid-sta              | 4.55  | 8.84 | 1 | 1 | 4.76  | 8.84 | 1 | 1 |       | 0.00 |   |   |
| P07910 | Heterogeneous nuclear ri               | 5.44  | 5.23 | 1 | 1 | 9.43  | 8.82 | 2 | 2 | 9.66  | 8.82 | 2 | 2 |
| Q9Y6A4 | Cilia- and flagella-associa            | 4.03  | 8.81 | 1 | 1 |       | 0.00 |   |   |       | 0.00 |   |   |
| Q13907 | Isopentenyl-diphosphate                | 3.86  | 8.81 | 1 | 1 |       | 0.00 |   |   |       | 0.00 |   |   |
| Q9Y2B0 | Protein canopy homolog                 | 4.00  | 8.79 | 1 | 1 | 4.34  | 8.79 | 1 | 1 | 4.44  | 8.79 | 1 | 1 |
| P51398 | 28S ribosomal protein S29, mitochond   | 0.00  |      |   |   |       | 0.00 |   |   | 10.96 | 8.79 | 2 | 2 |
| Q9BY32 | Inosine triphosphate pyrc              | 4.81  | 8.76 | 1 | 1 | 4.69  | 8.76 | 1 | 1 | 8.38  | 8.76 | 1 | 2 |
| P34949 | Mannose-6-phosphate isc                | 4.08  | 4.96 | 1 | 1 | 4.09  | 3.78 | 1 | 1 | 4.21  | 3.78 | 1 | 1 |
| P18621 | 60S ribosomal protein L1               | 5.14  | 8.70 | 1 | 1 | 4.40  | 8.70 | 1 | 1 | 10.46 | 8.70 | 1 | 2 |
| O60936 | Nucleolar protein 3 OS=Homo sapiens    | 0.00  |      |   |   | 4.73  | 8.68 | 1 | 1 |       | 0.00 |   |   |
| P04083 | Annexin A1 OS=Homo sapiens GN=AI       | 0.00  |      |   |   |       | 0.00 |   |   | 8.42  | 8.67 | 2 | 2 |
| P84098 | 60S ribosomal protein L1               | 5.66  | 8.67 | 1 | 1 | 5.12  | 8.67 | 1 | 1 | 4.73  | 8.67 | 1 | 1 |
| P12277 | Creatine kinase B-type O               | 10.54 | 8.66 | 2 | 2 | 4.55  | 4.20 | 1 | 1 | 4.49  | 4.20 | 1 | 1 |
| Q15404 | Ras suppressor protein 1               | 5.41  | 8.66 | 1 | 1 | 7.16  | 8.66 | 1 | 1 | 5.96  | 8.66 | 1 | 1 |
| Q92499 | ATP-dependent RNA helic                | 10.13 | 5.27 | 2 | 2 | 17.88 | 8.65 | 4 | 4 | 9.44  | 5.27 | 2 | 2 |
| Q8NBT2 | Kinetochore protein Spc24 OS=Homo      | 0.00  |      |   |   | 4.11  | 8.63 | 1 | 1 | 5.25  | 8.63 | 1 | 1 |
| Q9UEU0 | Vesicle transport through              | 4.55  | 8.62 | 1 | 1 |       | 0.00 |   |   |       | 0.00 |   |   |
| O15498 | Synaptobrevin homolog Y                | 4.06  | 8.59 | 1 | 1 | 4.14  | 8.59 | 1 | 1 |       | 0.00 |   |   |



|        |                                       |       |      |   |   |       |      |   |   |       |      |   |   |
|--------|---------------------------------------|-------|------|---|---|-------|------|---|---|-------|------|---|---|
| Q14974 | Importin subunit beta-1 (C            | 24.76 | 8.56 | 5 | 5 | 12.95 | 4.91 | 3 | 3 | 11.23 | 3.88 | 2 | 2 |
| Q96HC4 | PDZ and LIM domain pro                | 14.43 | 8.56 | 2 | 3 | 5.51  | 5.37 | 1 | 1 |       | 0.00 |   |   |
| Q9BY43 | Charged multivesicular body protein 4 |       | 0.00 |   |   |       | 0.00 |   |   | 4.22  | 8.56 | 1 | 1 |
| P84103 | Serine/arginine-rich splici           | 3.99  | 8.54 | 1 | 1 |       | 0.00 |   |   |       | 0.00 |   |   |
| P38919 | Eukaryotic initiation facto           | 10.43 | 8.52 | 2 | 2 | 5.35  | 3.89 | 1 | 1 | 9.79  | 8.52 | 2 | 2 |
| P63267 | Actin, gamma-enteric sm               | 13.87 | 8.51 | 2 | 3 | 13.95 | 8.51 | 2 | 3 | 18.72 | 8.51 | 2 | 4 |
| O00151 | PDZ and LIM domain protein 1 OS=Ho    |       | 0.00 |   |   | 4.99  | 8.51 | 1 | 1 |       | 0.00 |   |   |
| P53618 | Coatomer subunit beta O               | 19.46 | 6.61 | 3 | 4 | 9.82  | 3.78 | 2 | 2 | 5.29  | 1.89 | 1 | 1 |
| P54578 | Ubiquitin carboxyl-termin             | 5.74  | 4.86 | 1 | 1 | 14.05 | 8.50 | 3 | 3 | 6.21  | 4.86 | 1 | 1 |
| Q8VWQ1 | Soluble calcium-activated             | 9.08  | 8.48 | 2 | 2 | 5.23  | 4.49 | 1 | 1 | 5.73  | 4.49 | 1 | 1 |
| Q9BQA1 | Methylosome protein 50 OS=Homo sa     |       | 0.00 |   |   | 4.45  | 4.09 | 1 | 1 | 9.59  | 8.48 | 2 | 2 |
| P60033 | CD81 antigen OS=Homo                  | 6.16  | 8.47 | 1 | 1 |       | 0.00 |   |   |       | 0.00 |   |   |
| Q14749 | Glycine N-methyltransfera             | 4.87  | 8.47 | 1 | 1 |       | 0.00 |   |   |       | 0.00 |   |   |
| Q9HD15 | Steroid receptor RNA acti             | 4.02  | 8.47 | 1 | 1 |       | 0.00 |   |   |       | 0.00 |   |   |
| P52566 | Rho GDP-dissociation inhibitor 2 OS=H |       | 0.00 |   |   |       | 0.00 |   |   | 5.10  | 8.46 | 1 | 1 |
| Q9UL25 | Ras-related protein Rab-21 OS=Homo    |       | 0.00 |   |   |       | 0.00 |   |   | 4.27  | 8.44 | 1 | 1 |
| A6NKF9 | Putative Golgi pH regulator C OS=Horo |       | 0.00 |   |   |       | 0.00 |   |   | 5.39  | 8.44 | 1 | 1 |
| O00148 | ATP-dependent RNA helic               | 4.44  | 3.28 | 1 | 1 | 4.35  | 3.28 | 1 | 1 | 5.06  | 5.15 | 1 | 1 |
| Q9UHY7 | Enolase-phosphatase E1 OS=Homo sa     |       | 0.00 |   |   |       | 0.00 |   |   | 5.43  | 8.43 | 1 | 1 |
| P11388 | DNA topoisomerase 2- $\alpha$         | 29.26 | 4.51 | 5 | 6 | 23.00 | 4.25 | 5 | 5 | 31.46 | 6.60 | 5 | 6 |
| Q9Y3C1 | Nucleolar protein 16 OS=Homo sapier   |       | 0.00 |   |   | 4.06  | 8.43 | 1 | 1 |       | 0.00 |   |   |
| P78347 | General transcription fact            | 13.67 | 3.91 | 2 | 3 | 14.52 | 4.21 | 2 | 3 | 9.91  | 3.71 | 2 | 2 |
| P13861 | cAMP-dependent protein                | 15.78 | 8.42 | 2 | 3 |       | 0.00 |   |   | 5.39  | 4.21 | 1 | 1 |
| P22087 | rRNA 2'-O-methyltransfer              | 3.86  | 8.41 | 1 | 1 |       | 0.00 |   |   |       | 0.00 |   |   |
| Q96E11 | Ribosome-recycling facto              | 5.38  | 8.40 | 1 | 1 |       | 0.00 |   |   |       | 0.00 |   |   |
| O00487 | 26S proteasome non-ATPase regulato    |       | 0.00 |   |   | 5.00  | 8.39 | 1 | 1 |       | 0.00 |   |   |
| P62195 | 26S protease regulatory s             | 10.02 | 8.37 | 2 | 2 |       | 0.00 |   |   | 10.67 | 8.37 | 2 | 2 |
| P22061 | Protein-L-isoaspartate(D-             | 4.28  | 8.37 | 1 | 1 |       | 0.00 |   |   |       | 0.00 |   |   |
| Q00839 | Heterogeneous nuclear ri              | 11.29 | 5.70 | 2 | 2 | 15.46 | 8.36 | 3 | 3 | 11.62 | 5.70 | 2 | 2 |
| P30049 | ATP synthase subunit delta, mitochon  |       | 0.00 |   |   | 4.22  | 8.33 | 1 | 1 | 4.24  | 8.33 | 1 | 1 |
| P06133 | UDP-glucuronosyltransfer              | 5.58  | 8.33 | 1 | 1 |       | 0.00 |   |   |       | 0.00 |   |   |
| P40121 | Macrophage-capping prot               | 8.76  | 8.33 | 2 | 2 | 4.01  | 4.60 | 1 | 1 | 4.17  | 4.60 | 1 | 1 |
| P60228 | Eukaryotic translation init           | 19.05 | 8.31 | 2 | 4 | 15.16 | 8.31 | 2 | 3 | 15.65 | 8.31 | 2 | 3 |
| Q96S44 | TP53-regulating kinase OS=Homo sap    |       | 0.00 |   |   |       | 0.00 |   |   | 10.56 | 8.30 | 1 | 2 |
| Q8IYU8 | Calcium uptake protein 2              | 7.98  | 8.29 | 2 | 2 | 4.03  | 3.92 | 1 | 1 |       | 0.00 |   |   |
| P83731 | 60S ribosomal protein L2              | 4.30  | 8.28 | 1 | 1 | 8.59  | 8.28 | 1 | 2 | 4.48  | 8.28 | 1 | 1 |
| Q9NXV6 | CDKN2A-interacting protein OS=Homo    |       | 0.00 |   |   | 5.56  | 3.62 | 1 | 1 | 10.40 | 8.28 | 2 | 2 |
| Q5T2N8 | ATPase family AAA doma                | 5.31  | 4.87 | 1 | 1 |       | 0.00 |   |   | 4.59  | 3.41 | 1 | 1 |
| P54725 | UV excision repair proteir            | 6.14  | 8.26 | 1 | 1 | 5.04  | 8.26 | 1 | 1 |       | 0.00 |   |   |

|        |                                        |       |      |   |   |       |      |   |   |       |      |   |   |
|--------|----------------------------------------|-------|------|---|---|-------|------|---|---|-------|------|---|---|
| Q02818 | Nucleobindin-1 OS=Homo                 | 4.85  | 5.42 | 1 | 1 | 4.70  | 2.82 | 1 | 1 |       | 0.00 |   |   |
| Q9H2W6 | 39S ribosomal protein L4               | 4.91  | 8.24 | 1 | 1 |       | 0.00 |   |   |       | 0.00 |   |   |
| P17174 | Aspartate aminotransfera               | 9.03  | 8.23 | 2 | 2 |       | 0.00 |   |   | 9.28  | 8.23 | 2 | 2 |
| Q95757 | Heat shock 70 kDa protei               | 14.24 | 4.17 | 2 | 3 | 18.90 | 5.96 | 3 | 4 |       | 0.00 |   |   |
| Q8TF63 | Dendritic cell nuclear protein 1 OS=Hc | 0.00  |      |   |   |       | 0.00 |   |   | 4.29  | 8.20 | 1 | 1 |
| Q15287 | RNA-binding protein with               | 5.61  | 4.92 | 1 | 1 | 9.55  | 8.20 | 2 | 2 | 4.68  | 4.92 | 1 | 1 |
| P23246 | Splicing factor, proline- a            | 13.67 | 8.20 | 3 | 3 | 4.46  | 3.25 | 1 | 1 | 14.14 | 8.20 | 3 | 3 |
| Q16643 | Drebrin OS=Homo sapien                 | 5.41  | 2.77 | 1 | 1 | 4.31  | 3.08 | 1 | 1 | 5.15  | 2.31 | 1 | 1 |
| P10768 | S-formylglutathione hydro              | 6.69  | 8.16 | 1 | 1 | 5.28  | 8.16 | 1 | 1 | 4.29  | 8.16 | 1 | 1 |
| Q9BT78 | COP9 signalosome compl                 | 5.43  | 4.19 | 1 | 1 | 9.20  | 8.13 | 2 | 2 | 4.85  | 4.19 | 1 | 1 |
| Q16401 | 26S proteasome non-ATP                 | 10.65 | 8.13 | 2 | 2 | 10.45 | 8.13 | 2 | 2 | 5.42  | 4.37 | 1 | 1 |
| Q92804 | TATA-binding protein-ass               | 9.33  | 8.11 | 2 | 2 | 4.99  | 5.74 | 1 | 1 |       | 0.00 |   |   |
| Q15257 | Serine/threonine-protein               | 4.85  | 8.10 | 1 | 1 |       | 0.00 |   |   |       | 0.00 |   |   |
| P19388 | DNA-directed RNA polym                 | 4.36  | 8.10 | 1 | 1 |       | 0.00 |   |   | 4.61  | 8.10 | 1 | 1 |
| Q96I99 | Succinyl-CoA ligase [GDP               | 4.84  | 4.63 | 1 | 1 |       | 0.00 |   |   | 9.72  | 8.10 | 2 | 2 |
| P07477 | Trypsin-1 OS=Homo sapi                 | 4.07  | 8.10 | 1 | 1 | 9.69  | 8.10 | 1 | 2 | 5.37  | 8.10 | 1 | 1 |
| O15173 | Membrane-associated progesterone re    | 0.00  |      |   |   |       | 0.00 |   |   | 5.18  | 8.07 | 1 | 1 |
| O00231 | 26S proteasome non-ATP                 | 4.22  | 3.32 | 1 | 1 | 3.92  | 4.74 | 1 | 1 |       | 0.00 |   |   |
| Q9P2T1 | GMP reductase 2 OS=Ho                  | 5.09  | 8.05 | 1 | 1 |       | 0.00 |   |   | 5.20  | 8.05 | 1 | 1 |
| Q9Y263 | Phospholipase A-2-activa               | 8.71  | 5.53 | 2 | 2 | 4.26  | 2.39 | 1 | 1 | 5.13  | 2.52 | 1 | 1 |
| Q06830 | Peroxiredoxin-1 OS=Homo sapiens GM     | 0.00  |      |   |   |       | 0.00 |   |   | 4.35  | 8.04 | 1 | 1 |
| P11586 | C-1-tetrahydrofolate synt              | 18.33 | 6.31 | 4 | 4 | 14.37 | 5.13 | 3 | 3 | 14.57 | 5.13 | 3 | 3 |
| P33991 | DNA replication licensing factor MCM4  | 0.00  |      |   |   | 4.10  | 2.20 | 1 | 1 | 15.17 | 8.00 | 3 | 3 |
| P09874 | Poly [ADP-ribose] polyme               | 4.96  | 3.06 | 1 | 1 | 10.10 | 3.16 | 2 | 2 | 17.65 | 7.89 | 4 | 4 |
| P48047 | ATP synthase subunit O,                | 5.17  | 7.98 | 1 | 1 | 9.92  | 7.98 | 1 | 2 |       | 0.00 |   |   |
| P13796 | Plastin-2 OS=Homo sapie                | 3.85  | 2.55 | 1 | 1 | 9.16  | 5.58 | 2 | 2 | 4.15  | 2.39 | 1 | 1 |
| Q15005 | Signal peptidase complex               | 3.91  | 7.96 | 1 | 1 |       | 0.00 |   |   | 4.47  | 7.96 | 1 | 1 |
| Q15363 | Transmembrane emp24 c                  | 4.94  | 7.96 | 1 | 1 |       | 0.00 |   |   |       | 0.00 |   |   |
| P62191 | 26S protease regulatory s              | 15.78 | 7.95 | 2 | 3 | 5.33  | 4.55 | 1 | 1 | 4.99  | 3.41 | 1 | 1 |
| P19623 | Spermidine synthase OS=                | 10.11 | 7.95 | 1 | 2 | 4.28  | 7.95 | 1 | 1 | 4.70  | 7.95 | 1 | 1 |
| Q14697 | Neutral alpha-glucosidase              | 8.74  | 4.66 | 2 | 2 |       | 0.00 |   |   | 17.55 | 5.08 | 3 | 4 |
| Q15029 | 116 kDa U5 small nuclear               | 24.50 | 6.07 | 3 | 5 | 5.18  | 1.75 | 1 | 1 | 19.92 | 7.92 | 4 | 4 |
| Q9Y383 | Putative RNA-binding pro               | 12.78 | 7.91 | 2 | 3 | 4.38  | 3.83 | 1 | 1 |       | 0.00 |   |   |
| P51553 | Isocitrate dehydrogenase               | 6.27  | 7.89 | 1 | 1 | 6.95  | 7.89 | 1 | 1 | 6.70  | 7.89 | 1 | 1 |
| Q8N6H7 | ADP-ribosylation factor G              | 5.89  | 3.45 | 1 | 1 | 9.43  | 3.45 | 1 | 2 | 4.95  | 4.41 | 1 | 1 |
| O95232 | Luc7-like protein 3 OS=H               | 8.95  | 7.87 | 2 | 2 | 4.44  | 4.17 | 1 | 1 | 4.56  | 4.17 | 1 | 1 |
| P62913 | 60S ribosomal protein L1               | 3.89  | 7.87 | 1 | 1 |       | 0.00 |   |   |       | 0.00 |   |   |
| P61221 | ATP-binding cassette sub               | 8.48  | 5.34 | 2 | 2 | 4.00  | 2.50 | 1 | 1 | 4.99  | 2.67 | 1 | 1 |
| Q8NC51 | Plasminogen activator inf              | 12.45 | 7.84 | 2 | 3 | 5.00  | 3.92 | 1 | 1 | 9.98  | 7.84 | 2 | 2 |

|        |                                        |       |      |    |    |       |      |   |   |       |      |    |    |
|--------|----------------------------------------|-------|------|----|----|-------|------|---|---|-------|------|----|----|
| A6NCN2 | Putative keratin-87 protei             | 5.81  | 7.84 | 1  | 1  |       | 0.00 |   |   | 5.36  | 7.84 | 1  | 1  |
| O60934 | Nibrin OS=Homo sapiens                 | 4.74  | 2.25 | 1  | 1  | 4.79  | 2.25 | 1 | 1 | 5.16  | 3.32 | 1  | 1  |
| Q9H1E3 | Nuclear ubiquitous casein and cyclin-d |       | 0.00 |    |    | 5.90  | 7.82 | 1 | 1 | 5.71  | 7.82 | 1  | 1  |
| Q13257 | Mitotic spindle assembly checkpoint pr |       | 0.00 |    |    | 4.08  | 7.80 | 1 | 1 |       | 0.00 |    |    |
| P49720 | Proteasome subunit beta type-3 OS=H    |       | 0.00 |    |    | 4.27  | 7.80 | 1 | 1 | 4.14  | 7.80 | 1  | 1  |
| Q9Y446 | Plakophilin-3 OS=Homo s                | 13.77 | 5.90 | 3  | 3  | 8.89  | 3.89 | 2 | 2 | 18.43 | 7.78 | 4  | 4  |
| Q12874 | Splicing factor 3A subunit             | 9.03  | 4.19 | 1  | 2  | 9.07  | 7.78 | 2 | 2 | 11.44 | 4.19 | 1  | 2  |
| P02786 | Transferrin receptor prote             | 12.35 | 5.66 | 3  | 3  | 9.19  | 3.95 | 2 | 2 |       | 0.00 |    |    |
| O75822 | Eukaryotic translation init            | 4.39  | 7.75 | 1  | 1  |       | 0.00 |   |   | 4.96  | 7.75 | 1  | 1  |
| P19367 | Hexokinase-1 OS=Homo                   | 14.05 | 5.23 | 3  | 3  | 17.69 | 6.43 | 4 | 4 | 15.30 | 3.93 | 2  | 3  |
| P07814 | Bifunctional glutamate/pr              | 19.94 | 5.29 | 4  | 4  | 16.52 | 4.17 | 3 | 3 | 14.76 | 4.76 | 3  | 3  |
| Q9NY33 | Dipeptidyl peptidase 3 OS              | 5.63  | 3.26 | 1  | 1  | 5.17  | 3.26 | 1 | 1 | 9.72  | 4.48 | 2  | 2  |
| P36957 | Dihydrolipoylysine-residu              | 4.51  | 3.09 | 1  | 1  | 11.77 | 7.73 | 2 | 2 | 6.61  | 4.64 | 1  | 1  |
| Q09666 | Neuroblast differentiation             | 77.83 | 4.74 | 15 | 16 | 40.44 | 2.70 | 7 | 9 | 75.07 | 5.74 | 15 | 16 |
| Q9HC07 | Transmembrane protein                  | 5.26  | 7.72 | 1  | 1  |       | 0.00 |   |   |       | 0.00 |    |    |
| Q70J99 | Protein unc-13 homolog I               | 13.62 | 4.68 | 3  | 3  | 13.46 | 5.14 | 3 | 3 | 13.74 | 4.68 | 3  | 3  |
| Q8NE71 | ATP-binding cassette sub               | 12.60 | 3.43 | 2  | 3  | 13.03 | 5.68 | 3 | 3 | 18.06 | 5.92 | 3  | 4  |
| Q96S94 | Cyclin-L2 OS=Homo sapiens GN=CCN       |       | 0.00 |    |    |       | 0.00 |   |   | 4.99  | 7.69 | 1  | 1  |
| Q9GZZ1 | N-alpha-acetyltransferase 50 OS=Hon    |       | 0.00 |    |    |       | 0.00 |   |   | 4.55  | 7.69 | 1  | 1  |
| Q08J23 | tRNA (cytosine(34)-C(5))               | 8.21  | 4.43 | 2  | 2  | 4.90  | 3.26 | 1 | 1 | 5.12  | 2.35 | 1  | 1  |
| Q01130 | Serine/arginine-rich splici            | 4.93  | 7.69 | 1  | 1  | 9.62  | 7.69 | 1 | 2 | 5.40  | 7.69 | 1  | 1  |
| P31947 | 14-3-3 protein sigma OS=Homo sapie     |       | 0.00 |    |    |       | 0.00 |   |   | 11.32 | 7.66 | 1  | 2  |
| Q8TEA8 | D-tyrosyl-tRNA(Tyr) deac               | 5.08  | 7.66 | 1  | 1  | 4.90  | 7.66 | 1 | 1 | 9.48  | 7.66 | 1  | 2  |
| Q9NQT5 | Exosome complex compo                  | 5.96  | 7.64 | 1  | 1  | 4.12  | 7.64 | 1 | 1 |       | 0.00 |    |    |
| P19404 | NADH dehydrogenase [ul                 | 4.27  | 7.63 | 1  | 1  |       | 0.00 |   |   |       | 0.00 |    |    |
| P55795 | Heterogeneous nuclear ri               | 13.36 | 3.79 | 1  | 3  |       | 0.00 |   |   | 10.03 | 7.57 | 2  | 2  |
| Q32MZ4 | Leucine-rich repeat flightl            | 14.41 | 7.55 | 3  | 3  | 4.67  | 1.73 | 1 | 1 | 4.38  | 1.73 | 1  | 1  |
| Q14498 | RNA-binding protein 39 C               | 5.54  | 3.21 | 1  | 1  | 4.68  | 3.21 | 1 | 1 | 10.54 | 7.55 | 2  | 2  |
| P09234 | U1 small nuclear ribonucl              | 3.88  | 7.55 | 1  | 1  |       | 0.00 |   |   |       | 0.00 |    |    |
| Q01813 | ATP-dependent 6-phosph                 | 11.46 | 5.10 | 2  | 2  | 15.19 | 7.53 | 3 | 3 | 9.51  | 5.10 | 2  | 2  |
| Q13409 | Cytoplasmic dynein 1 inte              | 4.76  | 4.23 | 1  | 1  |       | 0.00 |   |   | 4.29  | 3.29 | 1  | 1  |
| P15311 | Ezrin OS=Homo sapiens                  | 13.36 | 7.51 | 3  | 3  | 5.53  | 2.56 | 1 | 1 | 5.80  | 2.56 | 1  | 1  |
| O43809 | Cleavage and polyadenyly               | 4.47  | 7.49 | 1  | 1  |       | 0.00 |   |   |       | 0.00 |    |    |
| O95861 | 3'(2'),5'-bisphosphate nu              | 4.86  | 7.47 | 1  | 1  | 10.24 | 7.47 | 1 | 2 |       | 0.00 |    |    |
| Q6ZRV2 | Protein FAM83H OS=Hon                  | 13.59 | 4.58 | 3  | 3  | 4.17  | 1.53 | 1 | 1 | 10.05 | 2.88 | 2  | 2  |
| P27824 | Calnexin OS=Homo sapie                 | 4.05  | 2.70 | 1  | 1  | 4.00  | 2.70 | 1 | 1 | 9.42  | 4.73 | 2  | 2  |
| Q86UE4 | Protein LYRIC OS=Homo sapiens GN=      |       | 0.00 |    |    |       | 0.00 |   |   | 9.89  | 7.39 | 2  | 2  |
| Q8VWX9 | Fatty acyl-CoA reductase               | 16.62 | 7.38 | 3  | 4  |       | 0.00 |   |   |       | 0.00 |    |    |
| O60664 | Perilipin-3 OS=Homo sapiens GN=PLI     |       | 0.00 |    |    | 9.93  | 7.37 | 2 | 2 | 9.77  | 7.37 | 2  | 2  |

|        |                                                            |       |      |   |   |       |      |   |   |       |      |   |   |
|--------|------------------------------------------------------------|-------|------|---|---|-------|------|---|---|-------|------|---|---|
| P11310 | Medium-chain specific ac                                   | 4.44  | 3.09 | 1 | 1 | 4.16  | 4.28 | 1 | 1 | 4.31  | 3.09 | 1 | 1 |
| Q15102 | Platelet-activating factor acetylhydrola                   |       | 0.00 |   |   | 4.03  | 7.36 | 1 | 1 |       | 0.00 |   |   |
| P63208 | S-phase kinase-associated protein 1 C                      |       | 0.00 |   |   | 4.23  | 7.36 | 1 | 1 |       | 0.00 |   |   |
| Q9Y294 | Histone chaperone ASF1A                                    | 4.47  | 7.35 | 1 | 1 |       |      |   |   | 4.90  | 7.35 | 1 | 1 |
| O00287 | Regulatory factor X-associated protein                     |       | 0.00 |   |   | 4.46  | 7.35 | 1 | 1 |       | 0.00 |   |   |
| Q96S19 | UPF0585 protein C16orf13 OS=Homo                           |       | 0.00 |   |   |       | 0.00 |   |   | 4.12  | 7.35 | 1 | 1 |
| Q9UBQ5 | Eukaryotic translation initiation factor                   |       | 0.00 |   |   | 5.71  | 7.34 | 1 | 1 | 5.08  | 7.34 | 1 | 1 |
| Q86VQ1 | Glucocorticoid-induced tr                                  | 4.86  | 7.31 | 1 | 1 |       | 0.00 |   |   |       | 0.00 |   |   |
| O15145 | Actin-related protein 2/3                                  | 4.87  | 7.30 | 1 | 1 | 3.96  | 7.30 | 1 | 1 |       | 0.00 |   |   |
| P23786 | Carnitine O-palmitoyltransferase 2, mi                     |       | 0.00 |   |   | 4.78  | 3.34 | 1 | 1 | 10.46 | 7.29 | 2 | 2 |
| P22234 | Multifunctional protein AC                                 | 3.81  | 3.06 | 1 | 1 | 3.93  | 3.06 | 1 | 1 | 4.78  | 4.24 | 1 | 1 |
| P30043 | Flavin reductase (NADPH                                    | 4.17  | 7.28 | 1 | 1 | 4.09  | 7.28 | 1 | 1 | 5.16  | 7.28 | 1 | 1 |
| P30519 | Heme oxygenase 2 OS=Homo sapiens                           |       | 0.00 |   |   |       | 0.00 |   |   | 4.31  | 7.28 | 1 | 1 |
| P25789 | Proteasome subunit alpha type-4 OS=                        |       | 0.00 |   |   | 4.04  | 7.28 | 1 | 1 |       | 0.00 |   |   |
| Q96MX6 | WD repeat-containing protein 92 OS=                        |       | 0.00 |   |   |       | 0.00 |   |   | 4.80  | 7.28 | 1 | 1 |
| O75083 | WD repeat-containing pro                                   | 5.33  | 2.64 | 1 | 1 | 5.25  | 2.64 | 1 | 1 | 10.49 | 7.26 | 2 | 2 |
| Q96A33 | Coiled-coil domain-contai                                  | 9.02  | 7.25 | 2 | 2 |       | 0.00 |   |   | 4.99  | 3.52 | 1 | 1 |
| P30084 | Enoyl-CoA hydratase, mit                                   | 5.03  | 7.24 | 1 | 1 | 5.75  | 7.24 | 1 | 1 | 5.14  | 7.24 | 1 | 1 |
| P11216 | Glycogen phosphorylase,                                    | 16.23 | 7.24 | 3 | 3 | 5.17  | 1.90 | 1 | 1 | 9.63  | 4.27 | 2 | 2 |
| O75431 | Metaxin-2 OS=Homo sapiens GN=MTX2 PE=1 SV=1 - [MTX2_HUMAN] |       |      |   |   |       | 0.00 |   |   | 4.42  | 7.22 | 1 | 1 |
| Q99848 | Probable rRNA-processing protein EBF                       |       | 0.00 |   |   |       | 0.00 |   |   | 5.09  | 7.19 | 1 | 1 |
| P49407 | Beta-arrestin-1 OS=Homo sapiens GN                         |       | 0.00 |   |   |       | 0.00 |   |   | 5.76  | 7.18 | 1 | 1 |
| Q9UGT4 | Sushi domain-containing                                    | 14.38 | 4.14 | 2 | 3 | 9.77  | 4.74 | 2 | 2 | 19.69 | 7.18 | 3 | 4 |
| Q9BQ67 | Glutamate-rich WD repea                                    | 4.34  | 3.59 | 1 | 1 |       | 0.00 |   |   | 9.75  | 7.17 | 2 | 2 |
| O00159 | Unconventional myosin-Ic                                   | 24.27 | 7.15 | 4 | 5 | 9.83  | 3.48 | 2 | 2 | 8.55  | 1.79 | 1 | 2 |
| Q9Y2C2 | Uronyl 2-sulfotransferase                                  | 4.73  | 7.14 | 1 | 1 |       | 0.00 |   |   |       | 0.00 |   |   |
| P13667 | Protein disulfide-isomerases                               | 19.06 | 7.13 | 3 | 4 | 14.72 | 7.13 | 3 | 3 | 4.58  | 2.33 | 1 | 1 |
| P55060 | Exportin-2 OS=Homo sap                                     | 10.43 | 1.75 | 1 | 2 | 18.75 | 5.66 | 3 | 4 | 19.99 | 4.84 | 3 | 4 |
| Q02252 | Methylmalonate-semialdehyde dehydr                         |       | 0.00 |   |   |       | 0.00 |   |   | 8.81  | 7.10 | 2 | 2 |
| Q58FF8 | Putative heat shock prote                                  | 13.02 | 7.09 | 2 | 3 | 4.82  | 3.94 | 1 | 1 | 5.02  | 3.94 | 1 | 1 |
| P00403 | Cytochrome c oxidase subunit 2 OS=H                        |       | 0.00 |   |   |       | 0.00 |   |   | 4.75  | 7.05 | 1 | 1 |
| Q15437 | Protein transport protein                                  | 15.81 | 7.04 | 3 | 3 | 4.02  | 1.83 | 1 | 1 | 10.30 | 4.17 | 2 | 2 |
| Q13435 | Splicing factor 3B subunit                                 | 15.30 | 4.92 | 2 | 3 | 5.75  | 2.12 | 1 | 1 | 5.00  | 1.68 | 1 | 1 |
| Q96C23 | Aldose 1-epimerase OS=H                                    | 4.79  | 7.02 | 1 | 1 |       | 0.00 |   |   | 5.49  | 7.02 | 1 | 1 |
| P30520 | Adenylosuccinate synthet                                   | 8.85  | 7.02 | 2 | 2 | 4.72  | 4.61 | 1 | 1 | 4.51  | 4.61 | 1 | 1 |
| Q86V81 | THO complex subunit 4 C                                    | 5.60  | 7.00 | 1 | 1 | 5.31  | 7.00 | 1 | 1 | 5.25  | 7.00 | 1 | 1 |
| O96019 | Actin-like protein 6A OS=Homo sapien                       |       | 0.00 |   |   | 4.94  | 6.99 | 1 | 1 | 5.29  | 6.99 | 1 | 1 |
| Q9H7E9 | UPF0488 protein C8orf33 OS=Homo s                          |       | 0.00 |   |   |       | 0.00 |   |   | 4.30  | 6.99 | 1 | 1 |
| Q9BUF5 | Tubulin beta-6 chain OS=                                   | 10.18 | 6.95 | 2 | 2 | 4.47  | 3.14 | 1 | 1 | 4.79  | 3.14 | 1 | 1 |

|        |                                         |       |      |   |   |       |      |   |      |       |      |   |   |
|--------|-----------------------------------------|-------|------|---|---|-------|------|---|------|-------|------|---|---|
| Q9C0K7 | STE20-related kinase adapter protein    | 0.00  |      |   |   | 0.00  |      |   | 5.07 | 6.94  | 1    | 1 |   |
| O43175 | D-3-phosphoglycerate de                 | 4.12  | 2.81 | 1 | 1 | 0.00  |      |   | 5.00 | 4.13  | 1    | 1 |   |
| P16930 | Fumarylacetoacetase OS=Homo sapie       | 0.00  |      |   |   | 0.00  |      |   | 8.88 | 6.92  | 2    | 2 |   |
| Q96E39 | RNA binding motif protein, X-linked-lik | 0.00  |      |   |   | 4.11  | 3.33 | 1 | 1    | 4.14  | 3.59 | 1 | 1 |
| Q9Y230 | RuvB-like 2 OS=Homo sa                  | 8.98  | 6.91 | 2 | 2 | 4.68  | 3.46 | 1 | 1    | 4.21  | 3.46 | 1 | 1 |
| Q6ZVX7 | F-box only protein 50 OS=Homo sapie     | 0.00  |      |   |   | 5.21  | 6.91 | 1 | 1    | 5.20  | 6.91 | 1 | 1 |
| P40925 | Malate dehydrogenase, c                 | 8.18  | 6.89 | 2 | 2 |       | 0.00 |   |      | 0.00  |      |   |   |
| Q9GZS3 | WD repeat-containing pro                | 4.81  | 6.89 | 1 | 1 | 4.13  | 6.89 | 1 | 1    | 4.61  | 6.89 | 1 | 1 |
| P82930 | 28S ribosomal protein S3                | 4.91  | 6.88 | 1 | 1 |       | 0.00 |   |      | 0.00  |      |   |   |
| Q6UW68 | Transmembrane protein                   | 4.26  | 6.88 | 1 | 1 |       | 0.00 |   |      | 0.00  |      |   |   |
| P45974 | Ubiquitin carboxyl-termin               | 9.13  | 3.96 | 2 | 2 | 12.13 | 5.13 | 2 | 3    | 8.68  | 5.13 | 2 | 2 |
| Q99436 | Proteasome subunit beta                 | 4.98  | 6.86 | 1 | 1 | 4.90  | 6.86 | 1 | 1    | 5.09  | 6.86 | 1 | 1 |
| P61313 | 60S ribosomal protein L15 OS=Homo       | 0.00  |      |   |   | 4.68  | 6.86 | 1 | 1    |       | 0.00 |   |   |
| Q9UKL4 | Gap junction delta-2 protein OS=Hom     | 0.00  |      |   |   | 3.95  | 6.85 | 1 | 1    |       | 0.00 |   |   |
| O95716 | Ras-related protein Rab-3D OS=Homc      | 0.00  |      |   |   |       | 0.00 |   | 4.55 | 6.85  | 1    | 1 |   |
| Q99614 | Tetratricopeptide repeat                | 5.10  | 6.85 | 1 | 1 | 5.09  | 6.85 | 1 | 1    | 5.24  | 6.85 | 1 | 1 |
| P17612 | cAMP-dependent protein                  | 5.15  | 6.84 | 1 | 1 |       | 0.00 |   | 5.23 | 6.84  | 1    | 1 |   |
| Q13813 | Spectrin alpha chain, non               | 13.97 | 2.22 | 3 | 3 | 20.60 | 3.11 | 4 | 4    | 19.58 | 3.07 | 4 | 4 |
| P37837 | Transaldolase OS=Homo                   | 3.92  | 3.56 | 1 | 1 |       | 0.00 |   | 4.25 | 3.26  | 1    | 1 |   |
| Q8WXS5 | Voltage-dependent calcium channel ga    | 0.00  |      |   |   |       | 0.00 |   | 5.64 | 6.82  | 1    | 1 |   |
| P31327 | Carbamoyl-phosphate syr                 | 23.19 | 6.80 | 5 | 5 | 14.24 | 3.60 | 3 | 3    | 13.84 | 3.27 | 3 | 3 |
| Q9UHX1 | Poly(U)-binding-splicing f              | 4.65  | 3.94 | 1 | 1 |       | 0.00 |   | 4.61 | 2.86  | 1    | 1 |   |
| Q13838 | Spliceosome RNA helicase                | 8.93  | 6.78 | 2 | 2 | 4.35  | 3.27 | 1 | 1    |       | 0.00 |   |   |
| P33316 | Deoxyuridine 5'-triphosph               | 4.17  | 6.75 | 1 | 1 |       | 0.00 |   | 4.64 | 6.75  | 1    | 1 |   |
| Q00688 | Peptidyl-prolyl cis-trans isomerase FKf | 0.00  |      |   |   |       | 0.00 |   | 4.71 | 6.70  | 1    | 1 |   |
| P07305 | Histone H1.0 OS=Homo s                  | 4.68  | 6.70 | 1 | 1 | 4.34  | 6.70 | 1 | 1    |       | 0.00 |   |   |
| Q9Y6G9 | Cytoplasmic dynein 1 light intermediat  | 0.00  |      |   |   | 8.43  | 6.69 | 2 | 2    | 4.11  | 3.25 | 1 | 1 |
| P54819 | Adenylate kinase 2, mitochondrial OS-   | 0.00  |      |   |   |       | 0.00 |   | 5.01 | 6.69  | 1    | 1 |   |
| Q96IU4 | Alpha/beta hydrolase domain-containi    | 0.00  |      |   |   | 3.93  | 6.67 | 1 | 1    |       | 0.00 |   |   |
| Q9NRR5 | Ubiquilin-4 OS=Homo sapiens GN=UB       | 0.00  |      |   |   | 4.22  | 2.66 | 1 | 1    | 9.03  | 6.66 | 2 | 2 |
| A1L0T0 | Acetolactate synthase-like              | 6.03  | 3.64 | 1 | 1 | 18.22 | 6.65 | 2 | 3    | 11.51 | 6.65 | 2 | 2 |
| Q8TCS8 | Polyribonucleotide nucleo               | 19.38 | 4.60 | 2 | 4 | 8.70  | 4.34 | 2 | 2    | 5.01  | 2.30 | 1 | 1 |
| P30085 | UMP-CMP kinase OS=Homo sapiens G        | 0.00  |      |   |   |       | 0.00 |   | 4.30 | 6.63  | 1    | 1 |   |
| P52292 | Importin subunit alpha-1                | 10.10 | 6.62 | 2 | 2 | 10.45 | 6.62 | 2 | 2    | 9.23  | 6.62 | 2 | 2 |
| Q3LXA3 | Bifunctional ATP-depende                | 9.06  | 6.61 | 2 | 2 | 4.65  | 2.96 | 1 | 1    |       | 0.00 |   |   |
| O75208 | Ubiquinone biosynthesis protein COQ9    | 0.00  |      |   |   | 4.92  | 6.60 | 1 | 1    |       | 0.00 |   |   |
| Q53H82 | Beta-lactamase-like protein 2 OS=Hor    | 0.00  |      |   |   | 4.91  | 6.60 | 1 | 1    |       | 0.00 |   |   |
| P27105 | Erythrocyte band 7 integral membran     | 0.00  |      |   |   | 6.58  | 6.60 | 1 | 1    | 5.98  | 6.60 | 1 | 1 |
| P36639 | 7,8-dihydro-8-oxoguanine                | 3.88  | 6.60 | 1 | 1 |       | 0.00 |   |      | 0.00  |      |   |   |

|        |                                       |       |      |   |   |       |      |   |   |       |      |   |   |
|--------|---------------------------------------|-------|------|---|---|-------|------|---|---|-------|------|---|---|
| O75251 | NADH dehydrogenase [ul                | 3.97  | 6.57 | 1 | 1 |       | 0.00 |   |   |       | 0.00 |   |   |
| Q96TA1 | Niban-like protein 1 OS=H             | 14.65 | 4.42 | 2 | 3 | 5.45  | 2.28 | 1 | 1 | 5.09  | 2.14 | 1 | 1 |
| P17655 | Calpain-2 catalytic subun             | 16.32 | 6.57 | 3 | 3 | 10.67 | 6.57 | 2 | 2 | 9.42  | 2.14 | 1 | 2 |
| Q96GG9 | DCN1-like protein 1 OS=H              | 5.18  | 6.56 | 1 | 1 | 4.84  | 6.56 | 1 | 1 | 4.32  | 6.56 | 1 | 1 |
| Q13151 | Heterogeneous nuclear ribonucleoprot  | 0.00  |      |   |   |       | 0.00 |   |   | 5.74  | 6.56 | 1 | 1 |
| P04259 | Keratin, type II cytoskeletal 6B OS=H | 0.00  |      |   |   | 12.67 | 4.43 | 2 | 3 | 4.42  | 2.13 | 1 | 1 |
| Q9BRX8 | Redox-regulatory protein              | 4.02  | 6.55 | 1 | 1 |       | 0.00 |   |   | 4.34  | 6.55 | 1 | 1 |
| Q99598 | Translin-associated prote             | 4.55  | 6.55 | 1 | 1 |       | 0.00 |   |   |       | 0.00 |   |   |
| Q9NUJ1 | Mycophenolic acid acyl-gl             | 4.93  | 6.54 | 1 | 1 | 5.45  | 6.54 | 1 | 1 | 5.05  | 6.54 | 1 | 1 |
| A6NIZ1 | Ras-related protein Rap-1             | 8.67  | 6.52 | 1 | 2 | 4.13  | 6.52 | 1 | 1 |       | 0.00 |   |   |
| O60716 | Catenin delta-1 OS=Homo               | 9.74  | 4.96 | 2 | 2 |       | 0.00 |   |   | 9.57  | 4.55 | 2 | 2 |
| O15266 | Short stature homeobox protein OS=H   | 0.00  |      |   |   | 3.92  | 6.51 | 1 | 1 |       | 0.00 |   |   |
| Q9NP79 | Vacuolar protein sorting-2            | 5.95  | 6.51 | 1 | 1 | 5.42  | 6.51 | 1 | 1 |       | 0.00 |   |   |
| A0MZ66 | Shootin-1 OS=Homo sapi                | 4.62  | 3.17 | 1 | 1 | 9.93  | 6.50 | 2 | 2 | 8.46  | 6.50 | 2 | 2 |
| P27694 | Replication protein A 70 kDa DNA-bind | 0.00  |      |   |   | 4.64  | 3.08 | 1 | 1 | 4.34  | 3.41 | 1 | 1 |
| Q9BZZ5 | Apoptosis inhibitor 5 OS=Homo sapien  | 0.00  |      |   |   | 4.72  | 3.05 | 1 | 1 | 10.04 | 3.44 | 1 | 2 |
| Q9Y5K8 | V-type proton ATPase subunit D OS=H   | 0.00  |      |   |   |       | 0.00 |   |   | 5.43  | 6.48 | 1 | 1 |
| Q15785 | Mitochondrial import rece             | 5.44  | 6.47 | 1 | 1 | 9.70  | 6.47 | 1 | 2 | 4.76  | 6.47 | 1 | 1 |
| P62701 | 40S ribosomal protein S4              | 3.97  | 6.46 | 1 | 1 | 4.07  | 6.46 | 1 | 1 | 4.28  | 6.46 | 1 | 1 |
| P36955 | Pigment epithelium-deriv              | 9.12  | 6.46 | 2 | 2 | 4.53  | 3.35 | 1 | 1 | 4.59  | 3.35 | 1 | 1 |
| Q587J8 | KHDC3-like protein OS=H               | 4.01  | 6.45 | 1 | 1 |       | 0.00 |   |   |       | 0.00 |   |   |
| P06730 | Eukaryotic translation init           | 3.90  | 6.45 | 1 | 1 |       | 0.00 |   |   |       | 0.00 |   |   |
| Q9BXR0 | Queuine tRNA-ribosyltran              | 5.21  | 6.45 | 1 | 1 |       | 0.00 |   |   |       | 0.00 |   |   |
| P33176 | Kinesin-1 heavy chain OS              | 4.17  | 1.56 | 1 | 1 | 3.96  | 1.56 | 1 | 1 | 13.52 | 4.88 | 3 | 3 |
| P61247 | 40S ribosomal protein S3              | 10.40 | 6.44 | 1 | 2 | 5.24  | 6.44 | 1 | 1 | 15.06 | 6.44 | 1 | 3 |
| P53041 | Serine/threonine-protein phosphatase  | 0.00  |      |   |   | 5.05  | 3.81 | 1 | 1 | 9.24  | 6.41 | 2 | 2 |
| O00567 | Nucleolar protein 56 OS=              | 9.75  | 6.40 | 2 | 2 |       | 0.00 |   |   | 10.07 | 3.20 | 1 | 2 |
| Q9HC38 | Glyoxalase domain-conta               | 4.49  | 6.39 | 1 | 1 |       | 0.00 |   |   |       | 0.00 |   |   |
| P41227 | N-alpha-acetyltransferase 10 OS=Homo  | 0.00  |      |   |   | 4.23  | 6.38 | 1 | 1 |       | 0.00 |   |   |
| Q13144 | Translation initiation fact           | 5.24  | 3.88 | 1 | 1 |       | 0.00 |   |   | 4.39  | 2.50 | 1 | 1 |
| P39656 | Dolichyl-diphosphooligos              | 4.83  | 6.36 | 1 | 1 |       | 0.00 |   |   |       | 0.00 |   |   |
| Q9HBA9 | Putative N-acetylated-alp             | 4.76  | 6.33 | 1 | 1 |       | 0.00 |   |   |       | 0.00 |   |   |
| P04179 | Superoxide dismutase [M               | 3.82  | 6.31 | 1 | 1 |       | 0.00 |   |   |       | 0.00 |   |   |
| Q9Y2Z0 | Suppressor of G2 allele o             | 5.57  | 6.30 | 1 | 1 |       | 0.00 |   |   | 11.51 | 6.30 | 1 | 2 |
| P31146 | Coronin-1A OS=Homo sapiens GN=CC      | 0.00  |      |   |   | 5.17  | 6.29 | 1 | 1 | 5.04  | 6.29 | 1 | 1 |
| P04626 | Receptor tyrosine-protein             | 21.00 | 5.10 | 3 | 4 | 4.78  | 1.51 | 1 | 1 | 10.19 | 3.11 | 2 | 2 |
| P30153 | Serine/threonine-protein              | 9.43  | 6.28 | 2 | 2 | 10.28 | 3.06 | 1 | 2 | 9.28  | 6.28 | 2 | 2 |
| P50213 | Isocitrate dehydrogenase [NAD] subu   | 0.00  |      |   |   |       | 0.00 |   |   | 4.60  | 6.28 | 1 | 1 |
| P00505 | Aspartate aminotransfera              | 8.11  | 6.28 | 2 | 2 | 3.91  | 3.49 | 1 | 1 |       | 0.00 |   |   |

|        |                                         |       |      |   |   |       |      |   |   |       |      |   |   |
|--------|-----------------------------------------|-------|------|---|---|-------|------|---|---|-------|------|---|---|
| P48444 | Coatomer subunit delta C                | 5.29  | 6.26 | 1 | 1 |       | 0.00 |   |   | 5.68  | 6.26 | 1 | 1 |
| P41252 | Isoleucine--tRNA ligase, c              | 8.66  | 3.41 | 2 | 2 | 9.46  | 2.93 | 2 | 2 | 14.62 | 4.28 | 3 | 3 |
| P30041 | Peroxiredoxin-6 OS=Homo sapiens GN      | 0.00  |      |   |   | 3.91  | 6.25 | 1 | 1 | 4.82  | 6.25 | 1 | 1 |
| P14678 | Small nuclear ribonucleop               | 3.96  | 6.25 | 1 | 1 |       | 0.00 |   |   |       | 0.00 |   |   |
| P23526 | Adenosylhomocysteinase                  | 8.80  | 6.25 | 2 | 2 | 4.72  | 3.01 | 1 | 1 |       | 0.00 |   |   |
| P62917 | 60S ribosomal protein L8 OS=Homo s      | 0.00  |      |   |   |       | 0.00 |   |   | 4.34  | 6.23 | 1 | 1 |
| P30038 | Delta-1-pyrroline-5-carbo               | 13.82 | 6.22 | 2 | 3 | 9.69  | 6.22 | 2 | 2 | 9.12  | 6.22 | 2 | 2 |
| P37235 | Hippocalcin-like protein 1              | 4.20  | 6.22 | 1 | 1 |       | 0.00 |   |   |       | 0.00 |   |   |
| Q9Y262 | Eukaryotic translation init             | 9.34  | 6.21 | 2 | 2 |       | 0.00 |   |   | 4.74  | 3.55 | 1 | 1 |
| O95299 | NADH dehydrogenase [ul                  | 4.91  | 6.20 | 1 | 1 | 6.09  | 6.20 | 1 | 1 | 5.26  | 6.20 | 1 | 1 |
| P60510 | Serine/threonine-protein                | 6.04  | 6.19 | 1 | 1 |       | 0.00 |   |   | 4.97  | 6.19 | 1 | 1 |
| O75534 | Cold shock domain-conta                 | 5.45  | 2.26 | 1 | 1 | 4.53  | 2.26 | 1 | 1 | 8.56  | 3.88 | 2 | 2 |
| P42566 | Epidermal growth factor r               | 9.40  | 3.91 | 2 | 2 | 4.82  | 2.23 | 1 | 1 | 5.55  | 2.12 | 1 | 1 |
| O00505 | Importin subunit alpha-4                | 4.09  | 3.45 | 1 | 1 | 4.10  | 2.69 | 1 | 1 | 4.91  | 2.69 | 1 | 1 |
| P21333 | Filamin-A OS=Homo sapi                  | 33.80 | 4.61 | 7 | 7 | 23.20 | 3.59 | 5 | 5 | 39.09 | 4.23 | 6 | 8 |
| O75494 | Serine/arginine-rich splicing factor 10 | 0.00  |      |   |   |       | 0.00 |   |   | 4.42  | 6.11 | 1 | 1 |
| Q16473 | Putative tenascin-XA OS=Homo sapien     | 0.00  |      |   |   | 4.76  | 6.11 | 1 | 1 |       | 0.00 |   |   |
| P61758 | Prefoldin subunit 3 OS=H                | 3.86  | 6.09 | 1 | 1 |       | 0.00 |   |   |       | 0.00 |   |   |
| Q68D91 | Metallo-beta-lactamase d                | 3.82  | 6.09 | 1 | 1 |       | 0.00 |   |   |       | 0.00 |   |   |
| P27635 | 60S ribosomal protein L10 OS=Homo       | 0.00  |      |   |   | 4.61  | 6.07 | 1 | 1 |       | 0.00 |   |   |
| O15160 | DNA-directed RNA polym                  | 4.87  | 6.07 | 1 | 1 |       | 0.00 |   |   |       | 0.00 |   |   |
| Q96DB5 | Regulator of microtubule                | 5.85  | 6.05 | 1 | 1 |       | 0.00 |   |   | 5.78  | 6.05 | 1 | 1 |
| P67936 | Tropomyosin alpha-4 chain OS=Homo       | 0.00  |      |   |   |       | 0.00 |   |   | 10.09 | 6.05 | 1 | 2 |
| Q92841 | Probable ATP-dependent                  | 8.71  | 3.70 | 2 | 2 | 5.27  | 2.06 | 1 | 1 | 13.52 | 4.39 | 2 | 3 |
| P62753 | 40S ribosomal protein S6                | 4.91  | 6.02 | 1 | 1 | 4.35  | 6.02 | 1 | 1 | 4.28  | 6.02 | 1 | 1 |
| Q9NVA1 | Ubiquinol-cytochrome-c reductase con    | 0.00  |      |   |   | 4.07  | 6.02 | 1 | 1 |       | 0.00 |   |   |
| Q9NYP9 | Protein Mis18-alpha OS=Homo sapien      | 0.00  |      |   |   | 4.08  | 6.01 | 1 | 1 |       | 0.00 |   |   |
| Q13126 | S-methyl-5'-thioadenosin                | 4.32  | 6.01 | 1 | 1 | 4.46  | 6.01 | 1 | 1 |       | 0.00 |   |   |
| P26196 | Probable ATP-dependent RNA helicase     | 0.00  |      |   |   | 5.87  | 6.00 | 1 | 1 | 5.42  | 6.00 | 1 | 1 |
| Q92734 | Protein TFG OS=Homo sapiens GN=T        | 0.00  |      |   |   |       | 0.00 |   |   | 4.39  | 6.00 | 1 | 1 |
| P02647 | Apolipoprotein A-I OS=H                 | 4.23  | 5.99 | 1 | 1 |       | 0.00 |   |   |       | 0.00 |   |   |
| Q12972 | Nuclear inhibitor of prote              | 4.44  | 5.98 | 1 | 1 | 4.47  | 5.98 | 1 | 1 |       | 0.00 |   |   |
| Q96JY6 | PDZ and LIM domain pro                  | 4.00  | 5.97 | 1 | 1 | 3.93  | 5.97 | 1 | 1 |       | 0.00 |   |   |
| Q8NC56 | LEM domain-containing p                 | 3.97  | 2.58 | 1 | 1 | 3.91  | 3.38 | 1 | 1 |       | 0.00 |   |   |
| Q13217 | DnaJ homolog subfamily                  | 5.54  | 5.95 | 1 | 1 |       | 0.00 |   |   | 5.95  | 5.95 | 1 | 1 |
| Q9Y3I0 | tRNA-splicing ligase RtcB               | 6.55  | 5.94 | 1 | 1 | 6.75  | 5.94 | 1 | 1 |       | 0.00 |   |   |
| Q9BR76 | Coronin-1B OS=Homo sapiens GN=CC        | 0.00  |      |   |   | 5.46  | 5.93 | 1 | 1 | 5.40  | 5.93 | 1 | 1 |
| Q8TAT6 | Nuclear protein localizat               | 14.10 | 5.92 | 2 | 3 | 15.11 | 5.92 | 2 | 3 | 11.30 | 2.96 | 1 | 2 |
| O00232 | 26S proteasome non-ATP                  | 4.95  | 2.85 | 1 | 1 | 12.61 | 5.92 | 2 | 3 | 4.52  | 2.85 | 1 | 1 |

|        |                                                                    |       |      |   |   |       |      |   |   |       |      |   |   |
|--------|--------------------------------------------------------------------|-------|------|---|---|-------|------|---|---|-------|------|---|---|
| Q9Y285 | Phenylalanine--tRNA ligase                                         | 9.04  | 5.91 | 2 | 2 | 8.51  | 5.91 | 2 | 2 | 5.37  | 2.76 | 1 | 1 |
| P21964 | Catechol O-methyltransferase                                       | 9.15  | 5.90 | 2 | 2 | 5.27  | 5.90 | 1 | 1 | 5.03  | 5.90 | 1 | 1 |
| P43246 | DNA mismatch repair protein Msh2 OS=Homo sapiens                   | 0.00  |      |   |   |       | 0.00 |   |   | 14.63 | 5.89 | 3 | 3 |
| Q6PID8 | Kelch domain-containing protein 10 OS=Homo sapiens                 | 0.00  |      |   |   |       | 0.00 |   |   | 4.40  | 5.88 | 1 | 1 |
| P24539 | ATP synthase F(0) complex subunit B OS=Homo sapiens                | 0.00  |      |   |   | 3.96  | 5.86 | 1 | 1 |       | 0.00 |   |   |
| Q9NUQ9 | Protein FAM49B OS=Homo sapiens                                     | 4.33  | 5.86 | 1 | 1 |       | 0.00 |   |   | 4.72  | 5.86 | 1 | 1 |
| P35606 | Coatamer subunit beta' C OS=Homo sapiens                           | 8.19  | 3.97 | 2 | 2 | 3.94  | 1.88 | 1 | 1 |       | 0.00 |   |   |
| Q96GM1 | Lipid phosphate phosphatase-related protein OS=Homo sapiens        | 0.00  |      |   |   |       | 0.00 |   |   | 4.18  | 5.83 | 1 | 1 |
| Q14764 | Major vault protein OS=Homo sapiens                                | 7.75  | 3.92 | 2 | 2 | 4.51  | 1.79 | 1 | 1 | 4.15  | 1.90 | 1 | 1 |
| P20618 | Proteasome subunit beta OS=Homo sapiens                            | 4.77  | 5.81 | 1 | 1 |       | 0.00 |   |   |       | 0.00 |   |   |
| Q13564 | NEDD8-activating enzyme E1 regulator OS=Homo sapiens               | 0.00  |      |   |   | 4.81  | 5.81 | 1 | 1 | 6.51  | 5.81 | 1 | 1 |
| O95678 | Keratin, type II cytoskeletal 75 OS=Homo sapiens                   | 0.00  |      |   |   |       | 0.00 |   |   | 8.68  | 5.81 | 2 | 2 |
| Q13148 | TAR DNA-binding protein 43 OS=Homo sapiens                         | 0.00  |      |   |   | 6.24  | 5.80 | 1 | 1 |       | 0.00 |   |   |
| Q9BWD1 | Acetyl-CoA acetyltransferase, cytosolic OS=Homo sapiens            | 0.00  |      |   |   |       | 0.00 |   |   | 4.95  | 5.79 | 1 | 1 |
| Q9Y2R9 | 28S ribosomal protein S7 OS=Homo sapiens                           | 4.25  | 5.79 | 1 | 1 | 4.32  | 5.79 | 1 | 1 | 4.33  | 5.79 | 1 | 1 |
| Q52LJ0 | Protein FAM98B OS=Homo sapiens                                     | 4.73  | 5.76 | 1 | 1 |       | 0.00 |   |   | 4.96  | 5.76 | 1 | 1 |
| P16401 | Histone H1.5 OS=Homo sapiens                                       | 4.28  | 5.75 | 1 | 1 |       | 0.00 |   |   | 4.19  | 5.75 | 1 | 1 |
| P17812 | CTP synthase 1 OS=Homo sapiens                                     | 6.03  | 3.05 | 1 | 1 | 10.45 | 5.75 | 2 | 2 | 11.26 | 5.75 | 2 | 2 |
| Q309B1 | Tripartite motif-containing protein 16 OS=Homo sapiens             | 0.00  |      |   |   | 4.23  | 5.75 | 1 | 1 |       | 0.00 |   |   |
| Q7Z434 | Mitochondrial antiviral-signaling protein OS=Homo sapiens          | 0.00  |      |   |   | 4.85  | 5.74 | 1 | 1 |       | 0.00 |   |   |
| P52788 | Spermine synthase OS=Homo sapiens                                  | 5.92  | 5.74 | 1 | 1 | 5.41  | 5.74 | 1 | 1 | 5.31  | 5.74 | 1 | 1 |
| Q6PID6 | Tetratricopeptide repeat protein 33 OS=Homo sapiens                | 0.00  |      |   |   |       | 0.00 |   |   | 4.44  | 5.73 | 1 | 1 |
| Q9H9J2 | 39S ribosomal protein L4 OS=Homo sapiens                           | 4.08  | 5.72 | 1 | 1 |       | 0.00 |   |   | 4.17  | 5.72 | 1 | 1 |
| Q99729 | Heterogeneous nuclear ribonucleoprotein A OS=Homo sapiens          | 5.59  | 5.72 | 1 | 1 | 4.82  | 5.72 | 1 | 1 |       | 0.00 |   |   |
| Q6P1N9 | Putative deoxyribonuclease TATDN1 C OS=Homo sapiens                | 0.00  |      |   |   |       | 0.00 |   |   | 4.57  | 5.72 | 1 | 1 |
| P21912 | Succinate dehydrogenase OS=Homo sapiens                            | 5.14  | 5.71 | 1 | 1 |       | 0.00 |   |   |       | 0.00 |   |   |
| P13797 | Plastin-3 OS=Homo sapiens                                          | 4.88  | 2.22 | 1 | 1 |       | 0.00 |   |   | 10.20 | 3.49 | 1 | 2 |
| Q9Y570 | Protein phosphatase metal ion dependent OS=Homo sapiens            | 4.87  | 5.70 | 1 | 1 |       | 0.00 |   |   |       | 0.00 |   |   |
| P25786 | Proteasome subunit alpha type-1 OS=Homo sapiens                    | 0.00  |      |   |   |       | 0.00 |   |   | 4.26  | 5.70 | 1 | 1 |
| O43709 | Probable 18S rRNA (guanine-N(7))-methyltransferase OS=Homo sapiens | 0.00  |      |   |   | 4.01  | 5.69 | 1 | 1 |       | 0.00 |   |   |
| Q99674 | Cell growth regulator with zinc finger OS=Homo sapiens             | 3.91  | 5.65 | 1 | 1 |       | 0.00 |   |   |       | 0.00 |   |   |
| Q15124 | Phosphoglucomutase-like protein OS=Homo sapiens                    | 13.08 | 5.64 | 2 | 3 | 8.77  | 5.64 | 2 | 2 | 4.49  | 2.82 | 1 | 1 |
| P07996 | Thrombospondin-1 OS=Homo sapiens                                   | 13.67 | 4.19 | 3 | 3 | 10.54 | 3.25 | 2 | 2 |       | 0.00 |   |   |
| Q9P0L0 | Vesicle-associated membrane protein-7 OS=Homo sapiens              | 0.00  |      |   |   | 4.80  | 5.62 | 1 | 1 | 4.45  | 5.62 | 1 | 1 |
| Q92882 | Osteoclast-stimulating factor OS=Homo sapiens                      | 4.25  | 5.61 | 1 | 1 |       | 0.00 |   |   | 4.25  | 5.61 | 1 | 1 |
| Q8TAQ2 | SWI/SNF complex subunit 1 OS=Homo sapiens                          | 9.08  | 2.97 | 2 | 2 | 4.05  | 1.24 | 1 | 1 | 5.66  | 2.64 | 1 | 1 |
| P46108 | Adapter molecule crk OS=Homo sapiens                               | 4.49  | 5.59 | 1 | 1 |       | 0.00 |   |   | 4.82  | 5.59 | 1 | 1 |
| Q9HB07 | UPF0160 protein MYG1, family OS=Homo sapiens                       | 4.96  | 5.59 | 1 | 1 |       | 0.00 |   |   | 5.52  | 5.59 | 1 | 1 |
| Q16543 | Hsp90 co-chaperone Cdc37 OS=Homo sapiens                           | 0.00  |      |   |   | 4.72  | 5.56 | 1 | 1 | 9.69  | 5.56 | 1 | 2 |



|        |                                                   |       |      |   |   |       |      |   |   |       |      |   |   |
|--------|---------------------------------------------------|-------|------|---|---|-------|------|---|---|-------|------|---|---|
| P04183 | Thymidine kinase, cytosol                         | 4.77  | 5.56 | 1 | 1 |       | 0.00 |   |   |       | 0.00 |   |   |
| Q9UKM9 | RNA-binding protein Raly OS=Homo sapiens          |       | 0.00 |   |   |       | 0.00 |   |   | 4.53  | 5.56 | 1 | 1 |
| Q92530 | Proteasome inhibitor PI31 subunit OS=Homo sapiens |       | 0.00 |   |   |       | 0.00 |   |   | 4.22  | 5.54 | 1 | 1 |
| P55263 | Adenosine kinase OS=Homo sapiens                  | 10.11 | 5.52 | 1 | 2 | 10.20 | 5.52 | 1 | 2 | 5.05  | 5.52 | 1 | 1 |
| O95571 | Persulfide dioxygenase E                          | 4.20  | 5.51 | 1 | 1 |       | 0.00 |   |   | 4.12  | 5.51 | 1 | 1 |
| P61026 | Ras-related protein Rab-1                         | 4.21  | 5.50 | 1 | 1 | 3.96  | 5.50 | 1 | 1 | 4.28  | 5.50 | 1 | 1 |
| P43304 | Glycerol-3-phosphate dehydrogenase                | 4.78  | 2.48 | 1 | 1 | 9.67  | 5.50 | 2 | 2 |       | 0.00 |   |   |
| P55039 | Developmentally-regulated GTP-binding protein     |       | 0.00 |   |   |       | 0.00 |   |   | 5.10  | 5.49 | 1 | 1 |
| Q5TC12 | ATP synthase mitochondrial                        | 5.52  | 5.49 | 1 | 1 | 4.93  | 5.49 | 1 | 1 |       | 0.00 |   |   |
| P37058 | Testosterone 17-beta-dehydrogenase                | 3.89  | 5.48 | 1 | 1 |       | 0.00 |   |   |       | 0.00 |   |   |
| P48507 | Glutamate--cysteine ligase regulatory subunit     |       | 0.00 |   |   |       | 0.00 |   |   | 4.38  | 5.47 | 1 | 1 |
| P30048 | Thioredoxin-dependent phosphatase                 | 4.27  | 5.47 | 1 | 1 |       | 0.00 |   |   |       | 0.00 |   |   |
| O00764 | Pyridoxal kinase OS=Homo sapiens                  | 5.37  | 5.45 | 1 | 1 | 5.19  | 5.45 | 1 | 1 | 4.45  | 5.45 | 1 | 1 |
| Q9H993 | UPF0364 protein C6orf211 OS=Homo sapiens          |       | 0.00 |   |   |       | 0.00 |   |   | 5.06  | 5.44 | 1 | 1 |
| Q99961 | Endophilin-A2 OS=Homo sapiens GN=Endophilin       |       | 0.00 |   |   |       | 0.00 |   |   | 5.86  | 5.43 | 1 | 1 |
| Q9UMX0 | Ubiquilin-1 OS=Homo sapiens GN=Ubiquilin          |       | 0.00 |   |   | 4.22  | 2.72 | 1 | 1 | 10.16 | 5.43 | 2 | 2 |
| Q9NQR4 | Omega-amidase NIT2 OS=Homo sapiens                |       | 0.00 |   |   |       | 0.00 |   |   | 4.85  | 5.43 | 1 | 1 |
| Q15393 | Splicing factor 3B subunit                        | 9.27  | 2.63 | 2 | 2 | 4.60  | 1.40 | 1 | 1 | 13.67 | 4.19 | 3 | 3 |
| Q9P015 | 39S ribosomal protein L15, mitochondrial          |       | 0.00 |   |   | 3.97  | 5.41 | 1 | 1 |       | 0.00 |   |   |
| Q8NBF2 | NHL repeat-containing protein                     | 8.85  | 5.37 | 2 | 2 | 9.95  | 3.44 | 1 | 2 | 10.35 | 3.44 | 1 | 2 |
| Q14847 | LIM and SH3 domain protein                        | 4.07  | 5.36 | 1 | 1 |       | 0.00 |   |   |       | 0.00 |   |   |
| P49903 | Selenide, water dikinase                          | 5.23  | 5.36 | 1 | 1 |       | 0.00 |   |   |       | 0.00 |   |   |
| Q8IVW6 | AT-rich interactive domain-containing protein     |       | 0.00 |   |   |       | 0.00 |   |   | 5.01  | 5.35 | 1 | 1 |
| P52272 | Heterogeneous nuclear ribonucleoprotein           | 4.53  | 2.19 | 1 | 1 |       | 0.00 |   |   | 5.32  | 3.15 | 1 | 1 |
| P51884 | Lumican OS=Homo sapiens                           | 4.52  | 5.33 | 1 | 1 | 4.62  | 5.33 | 1 | 1 | 9.91  | 5.33 | 1 | 2 |
| Q7Z6J2 | General receptor for phosphatidylinositol         | 3.88  | 5.32 | 1 | 1 |       | 0.00 |   |   |       | 0.00 |   |   |
| P07858 | Cathepsin B OS=Homo sapiens GN=Cathepsin          |       | 0.00 |   |   | 4.99  | 5.31 | 1 | 1 | 4.26  | 5.31 | 1 | 1 |
| Q9H7Z7 | Prostaglandin E synthase                          | 4.69  | 5.31 | 1 | 1 |       | 0.00 |   |   | 9.80  | 5.31 | 1 | 2 |
| P41091 | Eukaryotic translation initiation factor          |       | 0.00 |   |   |       | 0.00 |   |   | 4.25  | 5.30 | 1 | 1 |
| P02533 | Keratin, type I cytoskeletal                      | 7.76  | 5.08 | 2 | 2 | 8.63  | 5.30 | 2 | 2 | 4.18  | 3.18 | 1 | 1 |
| P55735 | Protein SEC13 homolog C                           | 4.35  | 5.28 | 1 | 1 | 4.95  | 5.28 | 1 | 1 |       | 0.00 |   |   |
| Q8ND83 | SLAIN motif-containing protein                    | 4.80  | 5.28 | 1 | 1 |       | 0.00 |   |   |       | 0.00 |   |   |
| P18615 | Negative elongation factor E OS=Homo sapiens      |       | 0.00 |   |   | 5.49  | 5.26 | 1 | 1 | 10.27 | 5.26 | 1 | 2 |
| Q99442 | Translocation protein SEC                         | 3.83  | 5.26 | 1 | 1 |       | 0.00 |   |   |       | 0.00 |   |   |
| Q16181 | Septin-7 OS=Homo sapiens GN=Septin                |       | 0.00 |   |   | 4.99  | 5.26 | 1 | 1 |       | 0.00 |   |   |
| Q14204 | Cytoplasmic dynein 1 heavy chain                  | 38.77 | 3.16 | 8 | 8 | 32.77 | 2.48 | 6 | 7 | 38.11 | 2.91 | 8 | 8 |
| P49841 | Glycogen synthase kinase-3 beta OS=Homo sapiens   |       | 0.00 |   |   |       | 0.00 |   |   | 4.36  | 5.24 | 1 | 1 |
| P43897 | Elongation factor Ts, mitochondrial               | 4.70  | 5.23 | 1 | 1 | 4.86  | 5.23 | 1 | 1 | 4.91  | 5.23 | 1 | 1 |
| P53990 | IST1 homolog OS=Homo sapiens GN=IST1              |       | 0.00 |   |   | 5.04  | 5.22 | 1 | 1 |       | 0.00 |   |   |

|        |                                   |          |      |    |    |       |      |   |   |       |      |   |   |
|--------|-----------------------------------|----------|------|----|----|-------|------|---|---|-------|------|---|---|
| P26373 | 60S ribosomal protein L1          | 4.01     | 5.21 | 1  | 1  | 3.93  | 5.21 | 1 | 1 | 4.22  | 5.21 | 1 | 1 |
| O95793 | Double-stranded RNA-bin           | 4.01     | 2.43 | 1  | 1  |       | 0.00 |   |   | 5.35  | 2.77 | 1 | 1 |
| O43396 | Thioredoxin-like protein 1        | 3.91     | 5.19 | 1  | 1  |       | 0.00 |   |   | 5.12  | 5.19 | 1 | 1 |
| Q9UBQ7 | Glyoxylate reductase/hyd          | 5.45     | 5.18 | 1  | 1  |       | 0.00 |   |   |       | 0.00 |   |   |
| Q9H0A0 | N-acetyltransferase 10 O          | 9.95     | 3.71 | 2  | 2  | 9.41  | 3.51 | 2 | 2 | 10.01 | 2.05 | 1 | 2 |
| P36871 | Phosphoglucomutase-1 C            | 9.04     | 5.16 | 2  | 2  | 9.27  | 5.16 | 2 | 2 | 4.50  | 2.85 | 1 | 1 |
| O95983 | Methyl-CpG-binding dom            | 3.89     | 5.15 | 1  | 1  |       | 0.00 |   |   |       | 0.00 |   |   |
| Q15424 | Scaffold attachment fact          | 4.90     | 2.84 | 1  | 1  |       | 0.00 |   |   | 10.21 | 2.30 | 2 | 2 |
| P29144 | Tripeptidyl-peptidase 2 O         | 10.44    | 2.88 | 2  | 2  | 20.31 | 5.12 | 3 | 4 | 16.25 | 5.12 | 3 | 3 |
| P50895 | Basal cell adhesion molecu        | OS=Homo  | 0.00 |    |    |       | 0.00 |   |   | 5.01  | 5.10 | 1 | 1 |
| P16422 | Epithelial cell adhesion m        | 4.36     | 5.10 | 1  | 1  | 4.47  | 5.10 | 1 | 1 |       | 0.00 |   |   |
| O94776 | Metastasis-associated protein     | MTA2 O   | 0.00 |    |    | 8.58  | 5.09 | 2 | 2 |       | 0.00 |   |   |
| Q15738 | Sterol-4-alpha-carboxylat         | 4.04     | 5.09 | 1  | 1  |       | 0.00 |   |   |       | 0.00 |   |   |
| Q8NFV4 | Alpha/beta hydrolase dor          | 4.49     | 5.08 | 1  | 1  |       | 0.00 |   |   | 5.20  | 5.08 | 1 | 1 |
| P08779 | Keratin, type I cytoskelet        | 8.17     | 4.86 | 2  | 2  | 4.14  | 2.11 | 1 | 1 |       | 0.00 |   |   |
| Q9NPF4 | Probable tRNA N6-adenosine        | threonyl | 0.00 |    |    | 3.99  | 5.07 | 1 | 1 |       | 0.00 |   |   |
| O75533 | Splicing factor 3B subunit        | 12.80    | 5.06 | 3  | 3  |       | 0.00 |   |   | 9.39  | 2.76 | 2 | 2 |
| Q9Y6Z7 | Collectin-10 OS=Homo sapiens      | GN=C     | 0.00 |    |    |       | 0.00 |   |   | 4.18  | 5.05 | 1 | 1 |
| Q9H4A6 | Golgi phosphoprotein 3 OS=Homo    | sapi     | 0.00 |    |    | 4.36  | 5.03 | 1 | 1 | 5.18  | 5.03 | 1 | 1 |
| P11940 | Polyadenylate-binding pro         | 9.45     | 5.03 | 2  | 2  | 9.47  | 5.03 | 2 | 2 | 5.62  | 2.67 | 1 | 1 |
| O14734 | Acyl-coenzyme A thioeste          | 4.28     | 5.02 | 1  | 1  |       | 0.00 |   |   |       | 0.00 |   |   |
| P54709 | Sodium/potassium-transporting     | ATPas    | 0.00 |    |    | 4.13  | 5.02 | 1 | 1 |       | 0.00 |   |   |
| P28288 | ATP-binding cassette sub          | 6.22     | 2.88 | 1  | 1  | 10.04 | 5.01 | 2 | 2 |       | 0.00 |   |   |
| Q14722 | Voltage-gated potassium           | 3.99     | 5.01 | 1  | 1  |       | 0.00 |   |   |       | 0.00 |   |   |
| P33993 | DNA replication licensing         | 4.81     | 3.06 | 1  | 1  | 4.42  | 1.95 | 1 | 1 | 4.30  | 1.95 | 1 | 1 |
| Q06430 | N-acetyllactosaminide be          | 4.98     | 5.00 | 1  | 1  |       | 0.00 |   |   |       | 0.00 |   |   |
| Q15435 | Protein phosphatase 1 re          | 5.04     | 5.00 | 1  | 1  |       | 0.00 |   |   |       | 0.00 |   |   |
| P80303 | Nucleobindin-2 OS=Homo sapiens    | GN       | 0.00 |    |    | 4.81  | 5.00 | 1 | 1 |       | 0.00 |   |   |
| Q8IZ26 | Zinc finger protein 34 OS=Homo    | sapie    | 0.00 |    |    |       | 0.00 |   |   | 5.18  | 5.00 | 1 | 1 |
| Q8NBJ4 | Golgi membrane protein 1 OS=Homo  |          | 0.00 |    |    |       | 0.00 |   |   | 4.85  | 4.99 | 1 | 1 |
| O60763 | General vesicular transpo         | 4.64     | 1.87 | 1  | 1  | 4.28  | 1.87 | 1 | 1 | 8.88  | 3.12 | 2 | 2 |
| Q8N2F6 | Armadillo repeat-containi         | 4.43     | 4.96 | 1  | 1  |       | 0.00 |   |   |       | 0.00 |   |   |
| P12429 | Annexin A3 OS=Homo sapiens        | GN=AI    | 0.00 |    |    |       | 0.00 |   |   | 4.24  | 4.95 | 1 | 1 |
| P09758 | Tumor-associated calcium signal   | trans    | 0.00 |    |    | 4.20  | 4.95 | 1 | 1 | 4.36  | 4.95 | 1 | 1 |
| P78527 | DNA-dependent protein k           | 57.01    | 3.95 | 11 | 13 | 32.51 | 2.69 | 7 | 7 | 27.38 | 2.33 | 6 | 6 |
| Q12824 | SWI/SNF-related matrix-associated | ac       | 0.00 |    |    |       | 0.00 |   |   | 4.27  | 4.94 | 1 | 1 |
| Q92979 | Ribosomal RNA small sub           | 3.94     | 4.92 | 1  | 1  |       | 0.00 |   |   |       | 0.00 |   |   |
| Q9UBE0 | SUMO-activating enzyme subunit    | 1 OS     | 0.00 |    |    | 5.39  | 4.91 | 1 | 1 | 5.01  | 4.91 | 1 | 1 |
| Q9NUE0 | Palmitoyltransferase ZDHHC18      | OS=Ho    | 0.00 |    |    | 3.97  | 4.90 | 1 | 1 |       | 0.00 |   |   |

|        |                                       |       |      |   |   |       |      |   |   |       |      |   |   |
|--------|---------------------------------------|-------|------|---|---|-------|------|---|---|-------|------|---|---|
| Q04637 | Eukaryotic translation init           | 18.09 | 4.88 | 4 | 4 | 5.25  | 2.13 | 1 | 1 | 4.66  | 1.06 | 1 | 1 |
| Q7L266 | Isoaspartyl peptidase/L-a             | 4.16  | 4.87 | 1 | 1 |       | 0.00 |   |   |       | 0.00 |   |   |
| Q5VW32 | BRO1 domain-containing protein BRO1   | 0.00  |      |   |   |       | 0.00 |   |   | 4.98  | 4.87 | 1 | 1 |
| O95218 | Zinc finger Ran-binding domain-contai | 0.00  |      |   |   |       | 0.00 |   |   | 4.29  | 4.85 | 1 | 1 |
| O00515 | Ladinin-1 OS=Homo sapi                | 4.02  | 2.32 | 1 | 1 |       | 0.00 |   |   | 4.44  | 2.51 | 1 | 1 |
| Q9BYV8 | Centrosomal protein of 41 kDa OS=Hc   | 0.00  |      |   |   |       | 0.00 |   |   | 5.85  | 4.83 | 1 | 1 |
| Q9BTE3 | Mini-chromosome mainte                | 5.18  | 4.83 | 1 | 1 |       | 0.00 |   |   |       | 0.00 |   |   |
| O00273 | DNA fragmentation factor subunit alph | 0.00  |      |   |   |       | 0.00 |   |   | 4.33  | 4.83 | 1 | 1 |
| Q9NWS0 | PIH1 domain-containing p              | 4.10  | 4.83 | 1 | 1 |       | 0.00 |   |   |       | 0.00 |   |   |
| Q99460 | 26S proteasome non-ATP                | 6.68  | 2.73 | 1 | 1 | 9.96  | 4.83 | 2 | 2 | 5.24  | 2.10 | 1 | 1 |
| Q9Y4P1 | Cysteine protease ATG4B OS=Homo s     | 0.00  |      |   |   |       | 0.00 |   |   | 4.24  | 4.83 | 1 | 1 |
| Q53GQ0 | Estradiol 17-beta-dehydrogenase 12 C  | 0.00  |      |   |   | 4.15  | 4.81 | 1 | 1 | 4.63  | 4.81 | 1 | 1 |
| Q12904 | Aminoacyl tRNA synthase               | 3.84  | 4.81 | 1 | 1 |       | 0.00 |   |   |       | 0.00 |   |   |
| Q7KZ85 | Transcription elongation f            | 6.13  | 1.33 | 1 | 1 | 4.73  | 1.10 | 1 | 1 | 15.36 | 3.71 | 3 | 3 |
| A8MU46 | Smoothelin-like protein 1 OS=Homo s   | 0.00  |      |   |   | 4.12  | 4.81 | 1 | 1 |       | 0.00 |   |   |
| P55265 | Double-stranded RNA-spe               | 18.63 | 3.59 | 3 | 4 | 9.49  | 2.69 | 2 | 2 | 4.27  | 1.22 | 1 | 1 |
| Q9H2U2 | Inorganic pyrophosphata               | 5.51  | 4.79 | 1 | 1 |       | 0.00 |   |   |       | 0.00 |   |   |
| O00541 | Pescadillo homolog OS=Homo sapiens    | 0.00  |      |   |   |       | 0.00 |   |   | 5.06  | 4.76 | 1 | 1 |
| Q9UMS4 | Pre-mRNA-processing factor 19 OS=H    | 0.00  |      |   |   | 4.35  | 4.76 | 1 | 1 |       | 0.00 |   |   |
| Q9NW64 | Pre-mRNA-splicing factor              | 4.66  | 4.76 | 1 | 1 |       | 0.00 |   |   |       | 0.00 |   |   |
| Q86TX2 | Acyl-coenzyme A thioeste              | 5.01  | 4.75 | 1 | 1 | 3.92  | 4.75 | 1 | 1 | 5.36  | 4.75 | 1 | 1 |
| P49354 | Protein farnesyltransferas            | 5.04  | 4.75 | 1 | 1 | 9.27  | 4.75 | 1 | 2 | 9.47  | 4.75 | 1 | 2 |
| Q2M2Z5 | Centrosomal protein kizuna OS=Homc    | 0.00  |      |   |   | 5.56  | 4.75 | 1 | 1 |       | 0.00 |   |   |
| Q16531 | DNA damage-binding pro                | 6.47  | 2.11 | 1 | 1 |       | 0.00 |   |   | 11.63 | 4.74 | 2 | 2 |
| P50219 | Motor neuron and pancre               | 3.81  | 4.74 | 1 | 1 |       | 0.00 |   |   |       | 0.00 |   |   |
| Q86VP6 | Cullin-associated NEDD8-              | 12.97 | 3.50 | 3 | 3 | 13.00 | 2.36 | 2 | 3 |       | 0.00 |   |   |
| Q86SH2 | Zygote arrest protein 1 OS=Homo sap   | 0.00  |      |   |   | 4.19  | 4.72 | 1 | 1 |       | 0.00 |   |   |
| P25788 | Proteasome subunit alph               | 4.07  | 4.71 | 1 | 1 |       | 0.00 |   |   |       | 0.00 |   |   |
| P46777 | 60S ribosomal protein L5              | 4.31  | 4.71 | 1 | 1 | 4.74  | 4.71 | 1 | 1 | 4.54  | 4.71 | 1 | 1 |
| P25205 | DNA replication licensing             | 4.84  | 2.48 | 1 | 1 |       | 0.00 |   |   | 5.89  | 2.23 | 1 | 1 |
| Q02218 | 2-oxoglutarate dehydroge              | 13.34 | 4.69 | 3 | 3 |       | 0.00 |   |   |       | 0.00 |   |   |
| Q96PZ0 | Pseudouridylate synthase              | 4.66  | 2.57 | 1 | 1 | 4.35  | 2.57 | 1 | 1 | 9.19  | 4.69 | 2 | 2 |
| O15144 | Actin-related protein 2/3 complex sub | 0.00  |      |   |   | 4.44  | 4.67 | 1 | 1 |       | 0.00 |   |   |
| A6NDG6 | Phosphoglycolate phosph               | 3.90  | 4.67 | 1 | 1 | 4.47  | 4.67 | 1 | 1 | 4.40  | 4.67 | 1 | 1 |
| Q7Z4P5 | Growth/differentiation factor 7 OS=Hc | 0.00  |      |   |   | 3.91  | 4.67 | 1 | 1 |       | 0.00 |   |   |
| Q9H8Y8 | Golgi reassembly-stacking protein 2 O | 0.00  |      |   |   | 8.34  | 4.65 | 1 | 2 |       | 0.00 |   |   |
| Q8N3X6 | Ligand-dependent nuclear receptor co  | 0.00  |      |   |   | 4.87  | 4.65 | 1 | 1 |       | 0.00 |   |   |
| P54727 | UV excision repair proteir            | 9.13  | 4.65 | 1 | 2 | 8.95  | 4.65 | 1 | 2 |       | 0.00 |   |   |
| P49585 | Choline-phosphate cytidy              | 4.39  | 4.63 | 1 | 1 |       | 0.00 |   |   | 5.74  | 4.63 | 1 | 1 |

|        |                                       |      |      |   |   |      |      |   |   |       |      |   |   |
|--------|---------------------------------------|------|------|---|---|------|------|---|---|-------|------|---|---|
| P31350 | Ribonucleoside-diphosph               | 4.12 | 4.63 | 1 | 1 | 4.11 | 4.63 | 1 | 1 | 4.37  | 4.63 | 1 | 1 |
| O95365 | Zinc finger and BTB domain-containing |      | 0.00 |   |   |      | 0.00 |   |   | 5.13  | 4.62 | 1 | 1 |
| Q8IZA3 | Histone H1oo OS=Homo                  | 4.00 | 4.62 | 1 | 1 |      | 0.00 |   |   |       | 0.00 |   |   |
| Q14161 | ARF GTPase-activating protein GIT2 C  |      | 0.00 |   |   | 4.80 | 4.61 | 1 | 1 |       | 0.00 |   |   |
| Q6P9A2 | Polypeptide N-acetylgalactosaminyltra |      | 0.00 |   |   |      | 0.00 |   |   | 5.01  | 4.61 | 1 | 1 |
| Q6ZN04 | RNA-binding protein MEX               | 5.20 | 4.57 | 1 | 1 |      | 0.00 |   |   |       | 0.00 |   |   |
| Q07960 | Rho GTPase-activating protein 1 OS=I  |      | 0.00 |   |   |      | 0.00 |   |   | 4.38  | 4.56 | 1 | 1 |
| Q9NP92 | 28S ribosomal protein S3              | 4.46 | 4.56 | 1 | 1 | 4.72 | 4.56 | 1 | 1 |       | 0.00 |   |   |
| O14579 | Coatomer subunit epsilon              | 3.97 | 4.55 | 1 | 1 | 4.03 | 4.55 | 1 | 1 | 4.47  | 4.55 | 1 | 1 |
| Q9H3P7 | Golgi resident protein GCP60 OS=Hon   |      | 0.00 |   |   |      | 0.00 |   |   | 11.88 | 4.55 | 1 | 2 |
| Q9Y276 | Mitochondrial chaperone BCS1 OS=Hc    |      | 0.00 |   |   |      | 0.00 |   |   | 4.15  | 4.53 | 1 | 1 |
| Q9Y6E2 | Basic leucine zipper and              | 5.30 | 4.53 | 1 | 1 | 5.16 | 4.53 | 1 | 1 | 4.45  | 4.53 | 1 | 1 |
| Q9Y266 | Nuclear migration protein             | 4.03 | 4.53 | 1 | 1 |      | 0.00 |   |   |       | 0.00 |   |   |
| Q3ZCQ8 | Mitochondrial import inner membrane   |      | 0.00 |   |   | 8.31 | 4.53 | 1 | 2 |       | 0.00 |   |   |
| Q06124 | Tyrosine-protein phosph               | 4.00 | 2.01 | 1 | 1 | 4.02 | 2.51 | 1 | 1 | 4.23  | 2.51 | 1 | 1 |
| Q15165 | Serum paraoxonase/arylesterase 2 OS   |      | 0.00 |   |   |      | 0.00 |   |   | 4.18  | 4.52 | 1 | 1 |
| Q9C0C2 | 182 kDa tankyrase-1-binc              | 8.68 | 2.20 | 2 | 2 | 8.24 | 1.97 | 2 | 2 | 5.28  | 1.45 | 1 | 1 |
| O14908 | PDZ domain-containing p               | 4.25 | 4.50 | 1 | 1 |      | 0.00 |   |   |       | 0.00 |   |   |
| O15231 | Zinc finger protein 185 O             | 4.81 | 4.50 | 1 | 1 | 5.79 | 4.50 | 1 | 1 |       | 0.00 |   |   |
| O00300 | Tumor necrosis factor receptor super  |      | 0.00 |   |   |      | 0.00 |   |   | 4.39  | 4.49 | 1 | 1 |
| Q8IXZ3 | Transcription factor Sp8 OS=Homo sa   |      | 0.00 |   |   |      | 0.00 |   |   | 4.48  | 4.49 | 1 | 1 |
| P10515 | Dihydrolipoyllysine-residu            | 8.99 | 4.48 | 2 | 2 |      | 0.00 |   |   | 4.87  | 2.32 | 1 | 1 |
| Q9UBS4 | DnaJ homolog subfamily B member 1:    |      | 0.00 |   |   |      | 0.00 |   |   | 4.27  | 4.47 | 1 | 1 |
| Q9Y365 | PCTP-like protein OS=Ho               | 3.99 | 4.47 | 1 | 1 | 4.77 | 4.47 | 1 | 1 | 4.56  | 4.47 | 1 | 1 |
| Q9UHB9 | Signal recognition particle           | 3.95 | 2.07 | 1 | 1 | 8.29 | 4.47 | 2 | 2 | 4.20  | 2.07 | 1 | 1 |
| Q7L0Y3 | Mitochondrial ribonucleas             | 4.32 | 4.47 | 1 | 1 |      | 0.00 |   |   |       | 0.00 |   |   |
| P10644 | cAMP-dependent protein                | 4.34 | 4.46 | 1 | 1 |      | 0.00 |   |   | 4.43  | 4.46 | 1 | 1 |
| P31321 | cAMP-dependent protein kinase type I  |      | 0.00 |   |   | 4.22 | 4.46 | 1 | 1 | 5.06  | 4.46 | 1 | 1 |
| Q9BST9 | Rhotekin OS=Homo sapie                | 4.95 | 4.44 | 1 | 1 |      | 0.00 |   |   | 4.99  | 4.44 | 1 | 1 |
| Q05655 | Protein kinase C delta typ            | 8.89 | 4.44 | 2 | 2 |      | 0.00 |   |   |       | 0.00 |   |   |
| Q9NYK5 | 39S ribosomal protein L39, mitochond  |      | 0.00 |   |   | 3.95 | 4.44 | 1 | 1 |       | 0.00 |   |   |
| Q9NVA2 | Septin-11 OS=Homo sapiens GN=SEP      |      | 0.00 |   |   |      | 0.00 |   |   | 5.07  | 4.43 | 1 | 1 |
| Q9NW68 | BSD domain-containing p               | 3.94 | 4.42 | 1 | 1 |      | 0.00 |   |   | 4.80  | 4.42 | 1 | 1 |
| O43837 | Isocitrate dehydrogenase [NAD] subu   |      | 0.00 |   |   |      | 0.00 |   |   | 5.04  | 4.42 | 1 | 1 |
| Q6P9B9 | Integrator complex subur              | 5.53 | 4.42 | 1 | 1 |      | 0.00 |   |   |       | 0.00 |   |   |
| Q00325 | Phosphate carrier protein, mitochondr |      | 0.00 |   |   |      | 0.00 |   |   | 4.19  | 4.42 | 1 | 1 |
| P26368 | Splicing factor U2AF 65 k             | 5.02 | 4.42 | 1 | 1 |      | 0.00 |   |   | 5.67  | 4.42 | 1 | 1 |
| Q14151 | Scaffold attachment fact              | 4.90 | 2.73 | 1 | 1 |      | 0.00 |   |   | 4.20  | 1.68 | 1 | 1 |
| Q92820 | Gamma-glutamyl hydrola                | 9.76 | 4.40 | 1 | 2 | 4.80 | 4.40 | 1 | 1 | 4.96  | 4.40 | 1 | 1 |

|        |                                        |       |      |   |   |      |      |   |   |       |      |   |   |
|--------|----------------------------------------|-------|------|---|---|------|------|---|---|-------|------|---|---|
| Q8TC12 | Retinol dehydrogenase 11 OS=Homo       | 0.00  |      |   |   | 0.00 |      |   |   | 4.53  | 4.40 | 1 | 1 |
| O00571 | ATP-dependent RNA helic                | 8.91  | 4.38 | 2 | 2 | 4.50 | 1.81 | 1 | 1 | 9.08  | 4.38 | 2 | 2 |
| P12236 | ADP/ATP translocase 3 OS=Homo sap      | 0.00  |      |   |   |      |      |   |   | 4.41  | 4.36 | 1 | 1 |
| P05141 | ADP/ATP translocase 2 O                | 4.80  | 4.36 | 1 | 1 | 4.79 | 4.36 | 1 | 1 | 4.48  | 4.36 | 1 | 1 |
| P22059 | Oxysterol-binding protein              | 3.92  | 2.35 | 1 | 1 |      | 0.00 |   |   | 9.15  | 4.34 | 2 | 2 |
| P53621 | Coatomer subunit alpha (C              | 10.19 | 3.10 | 2 | 2 | 4.98 | 1.31 | 1 | 1 | 14.57 | 3.02 | 2 | 3 |
| P12081 | Histidine--tRNA ligase, cytoplasmic OS | 0.00  |      |   |   |      | 0.00 |   |   | 5.32  | 4.32 | 1 | 1 |
| P04424 | Argininosuccinate lyase OS=Homo sap    | 0.00  |      |   |   | 4.31 | 4.31 | 1 | 1 | 4.53  | 4.31 | 1 | 1 |
| Q6YN16 | Hydroxysteroid dehydrog                | 4.80  | 4.31 | 1 | 1 |      | 0.00 |   |   | 4.22  | 4.31 | 1 | 1 |
| P42126 | Enoyl-CoA delta isomer                 | 4.34  | 4.30 | 1 | 1 |      | 0.00 |   |   | 4.19  | 4.30 | 1 | 1 |
| O75907 | Diacylglycerol O-acyltrans             | 4.13  | 4.30 | 1 | 1 | 9.17 | 4.30 | 1 | 2 |       | 0.00 |   |   |
| O14929 | Histone acetyltransferase              | 4.61  | 4.30 | 1 | 1 |      | 0.00 |   |   |       | 0.00 |   |   |
| Q9NVD7 | Alpha-parvin OS=Homo s                 | 3.93  | 4.30 | 1 | 1 |      | 0.00 |   |   |       | 0.00 |   |   |
| P14324 | Farnesyl pyrophosphate s               | 3.84  | 4.30 | 1 | 1 | 7.96 | 4.30 | 1 | 2 | 4.30  | 4.30 | 1 | 1 |
| P33908 | Mannosyl-oligosaccharide 1,2-alpha-m   | 0.00  |      |   |   | 5.25 | 4.29 | 1 | 1 |       | 0.00 |   |   |
| Q9H3N1 | Thioredoxin-related transmembrane p    | 0.00  |      |   |   |      | 0.00 |   |   | 4.20  | 4.29 | 1 | 1 |
| Q92733 | Proline-rich protein PRCC OS=Homo s    | 0.00  |      |   |   | 4.42 | 4.28 | 1 | 1 |       | 0.00 |   |   |
| P16278 | Beta-galactosidase OS=H                | 7.75  | 2.22 | 1 | 2 | 4.30 | 2.22 | 1 | 1 | 8.57  | 4.28 | 2 | 2 |
| Q8N2K0 | Monoacylglycerol lipase ABHD12 OS=     | 0.00  |      |   |   | 4.56 | 4.27 | 1 | 1 | 4.13  | 4.27 | 1 | 1 |
| Q96A49 | Synapse-associated prote               | 4.30  | 4.26 | 1 | 1 |      | 0.00 |   |   |       | 0.00 |   |   |
| P47897 | Glutamine--tRNA ligase C               | 8.81  | 4.26 | 2 | 2 | 4.99 | 2.06 | 1 | 1 |       | 0.00 |   |   |
| Q58FF3 | Putative endoplasmic-like protein OS=  | 0.00  |      |   |   | 4.05 | 4.26 | 1 | 1 |       | 0.00 |   |   |
| Q00341 | Vigilin OS=Homo sapiens                | 15.39 | 2.84 | 2 | 3 | 9.20 | 2.84 | 2 | 2 | 9.70  | 3.00 | 2 | 2 |
| Q9NUQ7 | Ufm1-specific protease 2 OS=Homo s     | 0.00  |      |   |   |      | 0.00 |   |   | 4.25  | 4.26 | 1 | 1 |
| Q9NXG2 | THUMP domain-containing protein 1 C    | 0.00  |      |   |   | 4.78 | 4.25 | 1 | 1 | 4.69  | 4.25 | 1 | 1 |
| P08754 | Guanine nucleotide-bindin              | 4.15  | 4.24 | 1 | 1 | 4.54 | 4.24 | 1 | 1 |       | 0.00 |   |   |
| Q9NR30 | Nucleolar RNA helicase 2               | 10.27 | 4.21 | 2 | 2 | 4.74 | 2.17 | 1 | 1 | 4.43  | 2.17 | 1 | 1 |
| P39748 | Flap endonuclease 1 OS=                | 3.98  | 4.21 | 1 | 1 |      | 0.00 |   |   | 4.38  | 4.21 | 1 | 1 |
| P21283 | V-type proton ATPase sul               | 4.11  | 4.19 | 1 | 1 |      | 0.00 |   |   |       | 0.00 |   |   |
| P61964 | WD repeat-containing protein 5 OS=H    | 0.00  |      |   |   |      | 0.00 |   |   | 4.20  | 4.19 | 1 | 1 |
| P34897 | Serine hydroxymethyltr                 | 5.09  | 4.17 | 1 | 1 | 5.00 | 4.17 | 1 | 1 | 4.80  | 4.17 | 1 | 1 |
| Q8IVD9 | NudC domain-containing                 | 4.47  | 4.16 | 1 | 1 |      | 0.00 |   |   | 9.04  | 4.16 | 1 | 2 |
| P46926 | Glucosamine-6-phosphat                 | 4.08  | 4.15 | 1 | 1 |      | 0.00 |   |   |       | 0.00 |   |   |
| Q15061 | WD repeat-containing protein 43 OS=    | 0.00  |      |   |   | 6.28 | 4.14 | 1 | 1 |       | 0.00 |   |   |
| Q92575 | UBX domain-containing protein 4 OS=    | 0.00  |      |   |   | 4.42 | 4.13 | 1 | 1 |       | 0.00 |   |   |
| Q9Y2X9 | Zinc finger protein 281 O              | 4.75  | 4.13 | 1 | 1 |      | 0.00 |   |   |       | 0.00 |   |   |
| P08621 | U1 small nuclear ribonucleoprotein 70  | 0.00  |      |   |   | 4.36 | 4.12 | 1 | 1 | 4.99  | 4.12 | 1 | 1 |
| Q9Y371 | Endophilin-B1 OS=Homo                  | 3.92  | 4.11 | 1 | 1 | 3.93 | 4.11 | 1 | 1 |       | 0.00 |   |   |
| O75306 | NADH dehydrogenase [ul                 | 3.94  | 4.10 | 1 | 1 | 4.75 | 4.10 | 1 | 1 | 4.18  | 4.10 | 1 | 1 |

|        |                                         |       |      |   |   |      |      |   |   |       |      |   |   |
|--------|-----------------------------------------|-------|------|---|---|------|------|---|---|-------|------|---|---|
| A8MVM7 | Putative uncharacterized protein ENSF   | 0.00  |      |   |   | 5.07 | 4.10 | 1 | 1 |       | 0.00 |   |   |
| O43602 | Neuronal migration protein doublecort   | 0.00  |      |   |   | 4.29 | 4.08 | 1 | 1 |       | 0.00 |   |   |
| Q02750 | Dual specificity mitogen-activated prot | 0.00  |      |   |   | 4.37 | 4.07 | 1 | 1 | 4.50  | 4.07 | 1 | 1 |
| P09543 | 2',3'-cyclic-nucleotide 3'-p            | 4.77  | 4.04 | 1 | 1 | 4.53 | 4.04 | 1 | 1 | 5.24  | 4.04 | 1 | 1 |
| Q9NQ29 | Putative RNA-binding pro                | 4.53  | 4.04 | 1 | 1 |      | 0.00 |   |   |       | 0.00 |   |   |
| P26640 | Valine--tRNA ligase OS=H                | 8.53  | 2.77 | 2 | 2 |      | 0.00 |   |   | 8.91  | 2.85 | 2 | 2 |
| P14923 | Junction plakoglobin OS=Homo sapien     | 0.00  |      |   |   | 5.13 | 4.03 | 1 | 1 |       | 0.00 |   |   |
| P51114 | Fragile X mental retardati              | 12.17 | 4.03 | 1 | 2 | 4.72 | 4.03 | 1 | 1 | 6.14  | 4.03 | 1 | 1 |
| Q96GQ7 | Probable ATP-dependent RNA helicase     | 0.00  |      |   |   |      | 0.00 |   |   | 9.22  | 4.02 | 2 | 2 |
| P11117 | Lysosomal acid phosphat                 | 4.15  | 4.02 | 1 | 1 |      | 0.00 |   |   |       | 0.00 |   |   |
| Q9Y2P8 | RNA 3'-terminal phosphat                | 4.33  | 4.02 | 1 | 1 |      | 0.00 |   |   |       | 0.00 |   |   |
| Q96GA3 | Protein LTV1 homolog OS                 | 3.96  | 4.00 | 1 | 1 |      | 0.00 |   |   |       | 0.00 |   |   |
| Q9UGV2 | Protein NDRG3 OS=Homo sapiens GN        | 0.00  |      |   |   | 4.46 | 4.00 | 1 | 1 |       | 0.00 |   |   |
| Q9BW91 | ADP-ribose pyrophosphat                 | 4.09  | 4.00 | 1 | 1 |      | 0.00 |   |   |       | 0.00 |   |   |
| Q9BPX6 | Calcium uptake protein 1, mitochondri   | 0.00  |      |   |   |      | 0.00 |   |   | 4.30  | 3.99 | 1 | 1 |
| Q8IVT2 | Mitotic interactor and substrate of PLK | 0.00  |      |   |   | 9.86 | 3.98 | 1 | 2 |       | 0.00 |   |   |
| P04278 | Sex hormone-binding glo                 | 4.07  | 3.98 | 1 | 1 |      | 0.00 |   |   | 4.62  | 3.98 | 1 | 1 |
| P61011 | Signal recognition particle 54 kDa prot | 0.00  |      |   |   |      | 0.00 |   |   | 5.37  | 3.97 | 1 | 1 |
| Q8WUA8 | Tsukushin OS=Homo sap                   | 4.31  | 3.97 | 1 | 1 |      |      |   |   |       |      |   |   |
| P07099 | Epoxide hydrolase 1 OS=                 | 5.02  | 3.96 | 1 | 1 |      | 0.00 |   |   |       | 0.00 |   |   |
| Q96C03 | Mitochondrial dynamics p                | 4.01  | 3.96 | 1 | 1 |      | 0.00 |   |   |       | 0.00 |   |   |
| Q9BZE4 | Nucleolar GTP-binding protein 1 OS=H    | 0.00  |      |   |   | 5.19 | 3.94 | 1 | 1 | 11.48 | 3.94 | 1 | 2 |
| P19971 | Thymidine phosphorylase OS=Homo s       | 0.00  |      |   |   |      | 0.00 |   |   | 4.47  | 3.94 | 1 | 1 |
| Q96EP5 | DAZ-associated protein 1                | 5.36  | 3.93 | 1 | 1 | 5.71 | 3.93 | 1 | 1 | 4.84  | 3.93 | 1 | 1 |
| P37287 | Phosphatidylinositol N-acetylglucosam   | 0.00  |      |   |   |      | 0.00 |   |   | 4.85  | 3.93 | 1 | 1 |
| Q9UI12 | V-type proton ATPase sul                | 4.89  | 3.93 | 1 | 1 | 4.65 | 3.93 | 1 | 1 | 4.65  | 3.93 | 1 | 1 |
| O95202 | LETM1 and EF-hand dom                   | 4.31  | 1.62 | 1 | 1 | 4.66 | 1.62 | 1 | 1 | 8.85  | 3.92 | 2 | 2 |
| P49257 | Protein ERGIC-53 OS=Homo sapiens (      | 0.00  |      |   |   |      | 0.00 |   |   | 5.00  | 3.92 | 1 | 1 |
| Q96K80 | Zinc finger CCCH domain-containing p    | 0.00  |      |   |   |      | 0.00 |   |   | 4.11  | 3.92 | 1 | 1 |
| Q8N4J0 | UPF0586 protein C9orf41                 | 3.93  | 3.91 | 1 | 1 |      | 0.00 |   |   |       | 0.00 |   |   |
| Q9H490 | Phosphatidylinositol glyca              | 5.13  | 3.91 | 1 | 1 |      | 0.00 |   |   | 4.36  | 3.91 | 1 | 1 |
| Q92890 | Ubiquitin fusion degradation protein 1  | 0.00  |      |   |   |      | 0.00 |   |   | 4.10  | 3.91 | 1 | 1 |
| Q14566 | DNA replication licensing               | 4.36  | 1.83 | 1 | 1 | 4.86 | 2.07 | 1 | 1 |       | 0.00 |   |   |
| P06737 | Glycogen phosphorylase,                 | 8.79  | 2.13 | 1 | 2 | 4.07 | 1.77 | 1 | 1 |       | 0.00 |   |   |
| Q8N336 | ELMO domain-containing protein 1 OS     | 0.00  |      |   |   |      | 0.00 |   |   | 4.26  | 3.89 | 1 | 1 |
| O76021 | Ribosomal L1 domain-containing prote    | 0.00  |      |   |   |      | 0.00 |   |   | 4.97  | 3.88 | 1 | 1 |
| Q15599 | Na(+)/H(+) exchange regulatory cofa     | 0.00  |      |   |   | 4.25 | 3.86 | 1 | 1 |       | 0.00 |   |   |
| Q9NYU2 | UDP-glucose:glycoprotein                | 10.71 | 2.89 | 2 | 2 |      | 0.00 |   |   | 4.80  | 0.96 | 1 | 1 |
| Q9NUG4 | Cerebral cavernous malfo                | 3.84  | 3.85 | 1 | 1 |      | 0.00 |   |   |       | 0.00 |   |   |

|        |                                         |       |      |   |   |       |      |   |   |       |      |   |   |
|--------|-----------------------------------------|-------|------|---|---|-------|------|---|---|-------|------|---|---|
| P12270 | Nucleoprotein TPR OS=H                  | 14.28 | 2.16 | 3 | 3 | 4.07  | 0.63 | 1 | 1 | 5.11  | 1.06 | 1 | 1 |
| Q9Y2R4 | Probable ATP-dependent RNA helicase     |       | 0.00 |   |   |       | 0.00 |   |   | 5.16  | 3.84 | 1 | 1 |
| Q9P287 | BRCA2 and CDKN1A-inter                  | 3.82  | 3.82 | 1 | 1 |       | 0.00 |   |   | 4.12  | 3.82 | 1 | 1 |
| P61160 | Actin-related protein 2 OS=Homo sapi    |       | 0.00 |   |   |       | 0.00 |   |   | 4.53  | 3.81 | 1 | 1 |
| O14979 | Heterogeneous nuclear ri                | 4.87  | 3.81 | 1 | 1 |       | 0.00 |   |   | 4.64  | 3.81 | 1 | 1 |
| A6NHL2 | Tubulin alpha chain-like 3              | 4.05  | 3.81 | 1 | 1 |       | 0.00 |   |   |       | 0.00 |   |   |
| O14983 | Sarcoplasmic/endoplasmic                | 5.04  | 2.30 | 1 | 1 | 4.28  | 1.50 | 1 | 1 | 4.83  | 2.30 | 1 | 1 |
| P31153 | S-adenosylmethionine syn                | 4.63  | 3.80 | 1 | 1 | 4.88  | 3.80 | 1 | 1 | 4.38  | 3.80 | 1 | 1 |
| Q8TE77 | Protein phosphatase Slingshot homolo    |       | 0.00 |   |   | 4.98  | 3.79 | 1 | 1 |       | 0.00 |   |   |
| O75643 | U5 small nuclear ribonuc                | 9.16  | 1.92 | 2 | 2 | 14.42 | 2.81 | 3 | 3 |       | 0.00 |   |   |
| Q8IYB3 | Serine/arginine repetitive matrix prote |       | 0.00 |   |   | 5.10  | 3.76 | 1 | 1 | 5.19  | 3.76 | 1 | 1 |
| P36269 | Gamma-glutamyltransferase 5 OS=Ho       |       | 0.00 |   |   | 5.01  | 3.75 | 1 | 1 |       | 0.00 |   |   |
| Q7Z5L9 | Interferon regulatory fact              | 5.21  | 3.75 | 1 | 1 |       | 0.00 |   |   |       | 0.00 |   |   |
| Q01082 | Spectrin beta chain, non-               | 15.19 | 2.16 | 3 | 3 | 9.82  | 1.44 | 2 | 2 | 15.59 | 2.37 | 3 | 3 |
| Q14344 | Guanine nucleotide-bindin               | 3.90  | 3.71 | 1 | 1 |       | 0.00 |   |   |       | 0.00 |   |   |
| O95396 | Adenylyltransferase and s               | 5.41  | 3.70 | 1 | 1 |       | 0.00 |   |   | 5.41  | 3.70 | 1 | 1 |
| Q92769 | Histone deacetylase 2 OS                | 3.89  | 3.69 | 1 | 1 |       | 0.00 |   |   |       | 0.00 |   |   |
| Q9BS26 | Endoplasmic reticulum re                | 4.48  | 3.69 | 1 | 1 | 4.64  | 3.69 | 1 | 1 | 5.15  | 3.69 | 1 | 1 |
| Q15075 | Early endosome antigen 1                | 4.74  | 1.13 | 1 | 1 | 5.68  | 1.20 | 1 | 1 | 15.84 | 3.69 | 3 | 3 |
| Q27J81 | Inverted formin-2 OS=Homo sapiens (     |       | 0.00 |   |   | 4.90  | 2.16 | 1 | 1 | 5.73  | 1.52 | 1 | 1 |
| P49321 | Nuclear autoantigenic spe               | 9.82  | 3.68 | 2 | 2 | 5.60  | 2.03 | 1 | 1 | 9.86  | 3.68 | 2 | 2 |
| Q8NHF3 | Nucleoporin Nup43 OS=Homo sapiens       |       | 0.00 |   |   | 4.01  | 3.68 | 1 | 1 |       | 0.00 |   |   |
| P35250 | Replication factor C subu               | 4.45  | 3.67 | 1 | 1 |       | 0.00 |   |   |       | 0.00 |   |   |
| Q01844 | RNA-binding protein EWS                 | 5.22  | 3.66 | 1 | 1 |       | 0.00 |   |   |       | 0.00 |   |   |
| P43034 | Platelet-activating factor              | 8.22  | 3.66 | 1 | 2 |       | 0.00 |   |   | 4.40  | 3.66 | 1 | 1 |
| P49356 | Protein farnesyltransferase subunit be  |       | 0.00 |   |   |       | 0.00 |   |   | 4.58  | 3.66 | 1 | 1 |
| Q9NSE4 | Isoleucine--tRNA ligase, r              | 9.63  | 3.66 | 2 | 2 |       | 0.00 |   |   | 5.26  | 1.98 | 1 | 1 |
| Q7Z2W4 | Zinc finger CCCH-type antiviral protein |       | 0.00 |   |   | 9.62  | 2.00 | 1 | 2 | 9.74  | 3.66 | 2 | 2 |
| Q01970 | 1-phosphatidylinositol 4,5              | 10.41 | 3.65 | 2 | 2 | 5.47  | 1.46 | 1 | 1 | 4.96  | 1.46 | 1 | 1 |
| Q6P2Q9 | Pre-mRNA-processing-spl                 | 19.71 | 3.64 | 4 | 4 |       | 0.00 |   |   | 5.58  | 0.99 | 1 | 1 |
| P08686 | Steroid 21-hydroxylase O                | 4.14  | 3.64 | 1 | 1 |       | 0.00 |   |   |       | 0.00 |   |   |
| O75530 | Polycomb protein EED OS                 | 4.42  | 3.63 | 1 | 1 |       | 0.00 |   |   |       | 0.00 |   |   |
| P41219 | Peripherin OS=Homo sap                  | 4.18  | 3.62 | 1 | 1 |       | 0.00 |   |   |       | 0.00 |   |   |
| Q9NYV4 | Cyclin-dependent kinase 12 OS=Homo      |       | 0.00 |   |   |       | 0.00 |   |   | 10.92 | 3.62 | 2 | 2 |
| Q9P289 | Serine/threonine-protein                | 4.25  | 3.61 | 1 | 1 |       | 0.00 |   |   |       | 0.00 |   |   |
| O15213 | WD repeat-containing protein 46 OS=     |       | 0.00 |   |   |       | 0.00 |   |   | 4.42  | 3.61 | 1 | 1 |
| A2A3N6 | Putative PIP5K1A and PS                 | 4.65  | 1.97 | 1 | 1 | 4.10  | 1.62 | 1 | 1 |       | 0.00 |   |   |
| P48637 | Glutathione synthetase O                | 4.17  | 3.59 | 1 | 1 |       | 0.00 |   |   |       | 0.00 |   |   |
| Q96PK6 | RNA-binding protein 14 OS=Homo sap      |       | 0.00 |   |   | 4.71  | 3.59 | 1 | 1 |       | 0.00 |   |   |

|        |                                          |      |      |   |   |      |      |   |   |       |      |   |   |
|--------|------------------------------------------|------|------|---|---|------|------|---|---|-------|------|---|---|
| Q9NVH1 | DnaJ homolog subfamily                   | 4.55 | 3.58 | 1 | 1 | 4.37 | 3.58 | 1 | 1 | 4.65  | 3.58 | 1 | 1 |
| Q8NFF5 | FAD synthase OS=Homo sapiens GN=         | 0.00 |      |   |   | 4.62 | 3.58 | 1 | 1 | 4.62  | 3.58 | 1 | 1 |
| O15382 | Branched-chain-amino-ac                  | 3.90 | 3.57 | 1 | 1 |      | 0.00 |   |   |       | 0.00 |   |   |
| P51116 | Fragile X mental retardation syndrome    | 0.00 |      |   |   |      | 0.00 |   |   | 5.51  | 3.57 | 1 | 1 |
| Q92917 | G patch domain and KOW                   | 3.88 | 3.57 | 1 | 1 |      | 0.00 |   |   |       | 0.00 |   |   |
| Q96SK2 | Transmembrane protein 209 OS=Horr        | 0.00 |      |   |   |      | 0.00 |   |   | 4.92  | 3.57 | 1 | 1 |
| Q96NJ3 | Zinc finger protein 285 OS=Homo sap      | 0.00 |      |   |   | 4.74 | 3.56 | 1 | 1 |       | 0.00 |   |   |
| Q9UNS2 | COP9 signalosome complex subunit 3       | 0.00 |      |   |   | 4.49 | 3.55 | 1 | 1 | 4.43  | 3.55 | 1 | 1 |
| Q8N8S7 | Protein enabled homolog                  | 4.03 | 3.55 | 1 | 1 |      | 0.00 |   |   |       | 0.00 |   |   |
| Q01650 | Large neutral amino acids transporter    | 0.00 |      |   |   | 3.98 | 3.55 | 1 | 1 | 4.24  | 3.55 | 1 | 1 |
| O96013 | Serine/threonine-protein                 | 3.88 | 3.55 | 1 | 1 |      | 0.00 |   |   |       | 0.00 |   |   |
| P11172 | Uridine 5'-monophosphat                  | 3.90 | 3.54 | 1 | 1 |      | 0.00 |   |   | 4.17  | 3.54 | 1 | 1 |
| A1A5D9 | Bicaudal D-related protein 2 OS=Hom      | 0.00 |      |   |   |      | 0.00 |   |   | 4.26  | 3.54 | 1 | 1 |
| Q9UN86 | Ras GTPase-activating protein-binding    | 0.00 |      |   |   | 4.43 | 3.53 | 1 | 1 |       | 0.00 |   |   |
| P52294 | Importin subunit alpha-5                 | 4.05 | 3.53 | 1 | 1 |      | 0.00 |   |   |       | 0.00 |   |   |
| P51648 | Fatty aldehyde dehydroge                 | 4.13 | 3.51 | 1 | 1 | 3.93 | 3.51 | 1 | 1 | 4.22  | 3.51 | 1 | 1 |
| Q6DD88 | Atlastin-3 OS=Homo sapi                  | 6.31 | 3.51 | 1 | 1 | 4.01 | 3.51 | 1 | 1 | 5.55  | 3.51 | 1 | 1 |
| Q5TDH0 | Protein DDI1 homolog 2                   | 3.84 | 3.51 | 1 | 1 |      | 0.00 |   |   |       | 0.00 |   |   |
| Q05519 | Serine/arginine-rich splici              | 4.31 | 3.51 | 1 | 1 |      | 0.00 |   |   |       | 0.00 |   |   |
| Q01831 | DNA repair protein complementing XP      | 0.00 |      |   |   | 5.99 | 3.51 | 1 | 1 |       | 0.00 |   |   |
| Q15172 | Serine/threonine-protein phosphatase     | 0.00 |      |   |   | 4.29 | 3.50 | 1 | 1 | 4.31  | 3.09 | 1 | 1 |
| Q15067 | Peroxisomal acyl-coenzym                 | 4.63 | 3.48 | 1 | 1 |      | 0.00 |   |   | 5.16  | 3.48 | 1 | 1 |
| P55010 | Eukaryotic translation init              | 4.96 | 3.48 | 1 | 1 | 9.78 | 3.48 | 1 | 2 | 5.13  | 3.48 | 1 | 1 |
| Q9GZM8 | Nuclear distribution protein nudE-like   | 0.00 |      |   |   | 4.07 | 3.48 | 1 | 1 |       | 0.00 |   |   |
| P35269 | General transcription factor IIF subuni  | 0.00 |      |   |   |      | 0.00 |   |   | 4.24  | 3.48 | 1 | 1 |
| P40222 | Alpha-taxilin OS=Homo s                  | 4.45 | 3.48 | 1 | 1 | 5.24 | 3.48 | 1 | 1 | 5.60  | 3.48 | 1 | 1 |
| P35659 | Protein DEK OS=Homo s                    | 4.36 | 3.47 | 1 | 1 |      | 0.00 |   |   |       | 0.00 |   |   |
| Q01085 | Nucleolysin TIAR OS=Hoi                  | 3.93 | 3.47 | 1 | 1 |      | 0.00 |   |   |       | 0.00 |   |   |
| P26639 | Threonine--tRNA ligase, cytoplasmic C    | 0.00 |      |   |   | 3.91 | 1.80 | 1 | 1 | 4.15  | 1.66 | 1 | 1 |
| O60784 | Target of Myb protein 1 OS=Homo sa       | 0.00 |      |   |   |      | 0.00 |   |   | 4.65  | 3.46 | 1 | 1 |
| Q13177 | Serine/threonine-protein kinase PAK 2    | 0.00 |      |   |   |      | 0.00 |   |   | 5.24  | 3.44 | 1 | 1 |
| Q9H1V8 | Sodium-dependent neutral amino acid      | 0.00 |      |   |   | 4.73 | 3.44 | 1 | 1 |       | 0.00 |   |   |
| O60701 | UDP-glucose 6-dehydroge                  | 4.05 | 3.44 | 1 | 1 | 4.02 | 3.44 | 1 | 1 | 9.56  | 3.44 | 1 | 2 |
| P23588 | Eukaryotic translation initiation factor | 0.00 |      |   |   | 9.71 | 3.44 | 1 | 2 | 15.02 | 3.44 | 1 | 3 |
| Q9Y2X3 | Nucleolar protein 58 OS=                 | 8.76 | 3.40 | 1 | 2 | 4.63 | 3.40 | 1 | 1 | 5.43  | 3.40 | 1 | 1 |
| O75475 | PC4 and SFRS1-interactir                 | 4.32 | 3.40 | 1 | 1 |      | 0.00 |   |   | 5.63  | 3.40 | 1 | 1 |
| Q86WB0 | Nuclear-interacting partn                | 3.89 | 3.39 | 1 | 1 |      | 0.00 |   |   |       | 0.00 |   |   |
| Q08945 | FACT complex subunit SSRP1 OS=Hor        | 0.00 |      |   |   | 5.67 | 3.39 | 1 | 1 |       | 0.00 |   |   |
| Q9Y6E0 | Serine/threonine-protein                 | 5.69 | 3.39 | 1 | 1 |      | 0.00 |   |   |       | 0.00 |   |   |



|        |                                          |       |      |   |      |       |      |   |   |       |      |   |   |
|--------|------------------------------------------|-------|------|---|------|-------|------|---|---|-------|------|---|---|
| Q5FYA8 | Arylsulfatase H OS=Homo sapiens GN       | 0.00  |      |   | 4.85 | 3.38  | 1    | 1 |   | 0.00  |      |   |   |
| P15924 | Desmoplakin OS=Homo s                    | 26.01 | 1.95 | 3 | 5    | 24.25 | 2.61 | 4 | 5 | 26.43 | 3.38 | 5 | 5 |
| P55084 | Trifunctional enzyme sub                 | 9.98  | 3.38 | 1 | 2    | 15.65 | 3.38 | 1 | 3 | 5.16  | 3.38 | 1 | 1 |
| O75844 | CAAX prenyl protease 1 h                 | 5.38  | 3.37 | 1 | 1    | 8.62  | 3.37 | 1 | 2 | 5.94  | 3.37 | 1 | 1 |
| Q96M27 | Protein PRRC1 OS=Homo                    | 3.89  | 3.37 | 1 | 1    |       | 0.00 |   |   |       | 0.00 |   |   |
| Q15833 | Syntaxin-binding protein 2 OS=Homo       | 0.00  |      |   |      | 3.98  | 3.37 | 1 | 1 |       | 0.00 |   |   |
| Q7Z3B4 | Nucleoporin p54 OS=Homo sapiens G        | 0.00  |      |   |      |       | 0.00 |   |   | 4.86  | 3.35 | 1 | 1 |
| Q14152 | Eukaryotic translation init              | 8.16  | 2.03 | 2 | 2    | 9.75  | 2.17 | 2 | 2 |       | 0.00 |   |   |
| Q86TD4 | Sarcalumenin OS=Homo sapiens GN=         | 0.00  |      |   |      |       | 0.00 |   |   | 5.49  | 3.33 | 1 | 1 |
| Q96EY1 | DnaJ homolog subfamily A member 3,       | 0.00  |      |   |      | 4.46  | 3.33 | 1 | 1 | 4.82  | 3.33 | 1 | 1 |
| Q9UHI8 | A disintegrin and metallo                | 5.26  | 3.31 | 1 | 1    |       | 0.00 |   |   |       | 0.00 |   |   |
| P78352 | Disks large homolog 4 OS=Homo sapi       | 0.00  |      |   |      |       | 0.00 |   |   | 4.65  | 3.31 | 1 | 1 |
| Q92879 | CUGBP Elav-like family member 1 OS=      | 0.00  |      |   |      | 3.98  | 3.29 | 1 | 1 | 4.43  | 3.29 | 1 | 1 |
| Q5K4L6 | Long-chain fatty acid trar               | 5.46  | 3.29 | 1 | 1    | 5.07  | 3.29 | 1 | 1 |       | 0.00 |   |   |
| O75153 | Clustered mitochondria p                 | 3.87  | 1.53 | 1 | 1    |       | 0.00 |   |   | 4.84  | 1.76 | 1 | 1 |
| P20073 | Annexin A7 OS=Homo sa                    | 9.60  | 3.28 | 1 | 2    | 5.32  | 3.28 | 1 | 1 |       | 0.00 |   |   |
| P18858 | DNA ligase 1 OS=Homo s                   | 9.51  | 3.26 | 2 | 2    | 9.37  | 3.26 | 2 | 2 | 4.95  | 1.52 | 1 | 1 |
| P41214 | Eukaryotic translation initiation factor | 0.00  |      |   |      | 4.13  | 3.25 | 1 | 1 |       | 0.00 |   |   |
| P13489 | Ribonuclease inhibitor OS                | 4.78  | 3.25 | 1 | 1    |       | 0.00 |   |   |       | 0.00 |   |   |
| Q8TEX9 | Importin-4 OS=Homo saj                   | 7.85  | 3.24 | 2 | 2    | 4.26  | 1.57 | 1 | 1 | 5.08  | 1.57 | 1 | 1 |
| Q2M2I5 | Keratin, type I cytoskeletal 24 OS=Ho    | 0.00  |      |   |      |       | 0.00 |   |   | 4.44  | 3.24 | 1 | 1 |
| Q8IXI1 | Mitochondrial Rho GTPas                  | 5.96  | 3.24 | 1 | 1    |       | 0.00 |   |   |       | 0.00 |   |   |
| P49821 | NADH dehydrogenase [ul                   | 3.93  | 3.23 | 1 | 1    |       | 0.00 |   |   |       | 0.00 |   |   |
| Q1KMD3 | Heterogeneous nuclear ribonucleoprot     | 0.00  |      |   |      | 5.82  | 3.21 | 1 | 1 | 5.19  | 3.21 | 1 | 1 |
| Q9UHD9 | Ubiquilin-2 OS=Homo saj                  | 4.50  | 3.21 | 1 | 1    |       | 0.00 |   |   |       | 0.00 |   |   |
| P63010 | AP-2 complex subunit bel                 | 8.69  | 3.20 | 2 | 2    |       | 0.00 |   |   |       | 0.00 |   |   |
| Q6P1J9 | Parafibromin OS=Homo sapiens GN=(        | 0.00  |      |   |      |       | 0.00 |   |   | 4.31  | 3.20 | 1 | 1 |
| Q6UN15 | Pre-mRNA 3'-end-processing factor FI     | 0.00  |      |   |      | 4.53  | 3.20 | 1 | 1 | 5.08  | 3.20 | 1 | 1 |
| Q53GS9 | U4/U6.U5 tri-snRNP-associated protein    | 0.00  |      |   |      | 4.38  | 3.19 | 1 | 1 |       | 0.00 |   |   |
| P50995 | Annexin A11 OS=Homo s                    | 4.74  | 3.17 | 1 | 1    |       | 0.00 |   |   |       | 0.00 |   |   |
| O60825 | 6-phosphofructo-2-kinase                 | 4.39  | 3.17 | 1 | 1    |       | 0.00 |   |   | 4.57  | 3.17 | 1 | 1 |
| Q07065 | Cytoskeleton-associated p                | 4.73  | 3.16 | 1 | 1    | 4.93  | 3.16 | 1 | 1 | 5.49  | 3.16 | 1 | 1 |
| Q9H0D6 | 5'-3' exoribonuclease 2 O                | 9.73  | 3.16 | 2 | 2    | 9.46  | 3.16 | 2 | 2 | 4.87  | 1.58 | 1 | 1 |
| Q10567 | AP-1 complex subunit bel                 | 4.83  | 1.58 | 1 | 1    | 4.07  | 1.58 | 1 | 1 |       | 0.00 |   |   |
| O14744 | Protein arginine N-methyltransferase 5   | 0.00  |      |   |      | 3.98  | 3.14 | 1 | 1 | 4.57  | 3.14 | 1 | 1 |
| P04004 | Vitronectin OS=Homo saj                  | 4.54  | 3.14 | 1 | 1    | 4.34  | 3.14 | 1 | 1 | 4.56  | 3.14 | 1 | 1 |
| Q96AE4 | Far upstream element-binding protein     | 0.00  |      |   |      | 9.65  | 3.11 | 1 | 2 | 4.56  | 3.11 | 1 | 1 |
| Q6P1M0 | Long-chain fatty acid transport protein  | 0.00  |      |   |      |       | 0.00 |   |   | 5.44  | 3.11 | 1 | 1 |
| P56192 | Methionine--tRNA ligase,                 | 4.79  | 1.89 | 1 | 1    | 8.08  | 3.11 | 2 | 2 |       | 0.00 |   |   |

|        |                                        |       |      |   |   |       |      |   |   |      |      |   |   |
|--------|----------------------------------------|-------|------|---|---|-------|------|---|---|------|------|---|---|
| P49736 | DNA replication licensing factor MCM2  | 0.00  |      |   |   | 0.00  |      |   |   | 5.09 | 3.10 | 1 | 1 |
| Q9NP81 | Serine--tRNA ligase, mitochondrial OS  | 0.00  |      |   |   | 0.00  |      |   |   | 5.53 | 3.09 | 1 | 1 |
| Q13867 | Bleomycin hydrolase OS=Homo sapien     | 0.00  |      |   |   | 0.00  |      |   |   | 4.83 | 3.08 | 1 | 1 |
| P23368 | NAD-dependent malic en:                | 4.29  | 3.08 | 1 | 1 | 5.00  | 3.08 | 1 | 1 |      | 0.00 |   |   |
| Q13492 | Phosphatidylinositol-bindi             | 4.42  | 3.07 | 1 | 1 |       | 0.00 |   |   | 5.01 | 3.07 | 1 | 1 |
| Q9Y265 | RuvB-like 1 OS=Homo sa                 | 4.40  | 3.07 | 1 | 1 | 9.03  | 3.07 | 1 | 2 | 5.00 | 3.07 | 1 | 1 |
| P50851 | Lipopolysaccharide-respo               | 9.81  | 1.96 | 2 | 2 |       | 0.00 |   |   | 5.07 | 1.12 | 1 | 1 |
| Q9C0E8 | Protein lunapark OS=Hor                | 3.85  | 3.04 | 1 | 1 |       | 0.00 |   |   |      | 0.00 |   |   |
| Q494U1 | Pleckstrin homology dom                | 4.02  | 3.02 | 1 | 1 |       | 0.00 |   |   |      | 0.00 |   |   |
| Q7Z5R6 | Amyloid beta A4 precursor protein-bin  | 0.00  |      |   |   |       | 0.00 |   |   | 4.21 | 3.00 | 1 | 1 |
| Q9HC77 | Centromere protein J OS:               | 4.73  | 1.57 | 1 | 1 |       | 0.00 |   |   | 4.24 | 1.42 | 1 | 1 |
| Q13618 | Cullin-3 OS=Homo sapiens GN=CUL3       | 0.00  |      |   |   |       | 0.00 |   |   | 5.23 | 2.99 | 1 | 1 |
| Q96HE7 | ERO1-like protein alpha C              | 3.87  | 2.99 | 1 | 1 |       | 0.00 |   |   |      | 0.00 |   |   |
| P18031 | Tyrosine-protein phosphat              | 4.14  | 2.99 | 1 | 1 |       | 0.00 |   |   |      | 0.00 |   |   |
| O15075 | Serine/threonine-protein kinase DCLK:  | 0.00  |      |   |   | 4.25  | 2.97 | 1 | 1 |      | 0.00 |   |   |
| P26641 | Elongation factor 1-gamm               | 3.90  | 2.97 | 1 | 1 |       | 0.00 |   |   |      | 0.00 |   |   |
| P05166 | Propionyl-CoA carboxylas               | 9.83  | 2.97 | 1 | 2 |       | 0.00 |   |   | 4.32 | 2.97 | 1 | 1 |
| P11217 | Glycogen phosphorylase,                | 5.51  | 2.97 | 1 | 1 |       | 0.00 |   |   |      | 0.00 |   |   |
| Q9NRY5 | Protein FAM114A2 OS=Homo sapiens       | 0.00  |      |   |   |       | 0.00 |   |   | 4.20 | 2.97 | 1 | 1 |
| Q8WVM8 | Sec1 family domain-containing protein  | 0.00  |      |   |   | 8.98  | 2.96 | 1 | 2 |      | 0.00 |   |   |
| Q9Y305 | Acyl-coenzyme A thioeste               | 3.95  | 2.96 | 1 | 1 |       | 0.00 |   |   |      | 0.00 |   |   |
| P28329 | Choline O-acetyltransfera              | 3.90  | 2.94 | 1 | 1 |       | 0.00 |   |   |      | 0.00 |   |   |
| P61201 | COP9 signalosome compl                 | 3.98  | 2.93 | 1 | 1 |       | 0.00 |   |   |      | 0.00 |   |   |
| P31930 | Cytochrome b-c1 comple:                | 4.52  | 2.92 | 1 | 1 | 4.34  | 2.92 | 1 | 1 |      | 0.00 |   |   |
| Q9UPT8 | Zinc finger CCCH domain-containing p   | 0.00  |      |   |   | 8.28  | 2.92 | 2 | 2 |      | 0.00 |   |   |
| Q9Y4P3 | Transducin beta-like protein 2 OS=Ho   | 0.00  |      |   |   |       | 0.00 |   |   | 4.14 | 2.91 | 1 | 1 |
| Q9HAV4 | Exportin-5 OS=Homo sap                 | 4.04  | 1.66 | 1 | 1 | 4.30  | 1.66 | 1 | 1 | 4.88 | 1.25 | 1 | 1 |
| P55196 | Afadin OS=Homo sapiens                 | 9.84  | 1.92 | 2 | 2 | 4.09  | 0.99 | 1 | 1 | 4.78 | 0.93 | 1 | 1 |
| Q7Z6Z7 | E3 ubiquitin-protein ligase            | 10.30 | 0.94 | 2 | 2 | 18.62 | 1.97 | 4 | 4 | 5.49 | 0.73 | 1 | 1 |
| Q04206 | Transcription factor p65 (             | 4.65  | 2.90 | 1 | 1 |       | 0.00 |   |   |      | 0.00 |   |   |
| Q92973 | Transportin-1 OS=Homo sapiens GN=      | 0.00  |      |   |   |       | 0.00 |   |   | 5.22 | 2.90 | 1 | 1 |
| Q8NCA5 | Protein FAM98A OS=Hon                  | 4.28  | 2.89 | 1 | 1 | 4.19  | 2.89 | 1 | 1 |      | 0.00 |   |   |
| P05165 | Propionyl-CoA carboxylas               | 4.77  | 2.88 | 1 | 1 |       | 0.00 |   |   |      | 0.00 |   |   |
| Q9P258 | Protein RCC2 OS=Homo sapiens GN=       | 0.00  |      |   |   | 4.79  | 2.87 | 1 | 1 |      | 0.00 |   |   |
| Q14728 | Major facilitator superfamily domain-c | 0.00  |      |   |   | 3.99  | 2.86 | 1 | 1 |      | 0.00 |   |   |
| Q9NNW7 | Thioredoxin reductase 2,               | 5.06  | 2.86 | 1 | 1 | 8.35  | 2.86 | 1 | 2 | 4.27 | 2.86 | 1 | 1 |
| Q9UP83 | Conserved oligomeric Gol               | 5.27  | 2.86 | 1 | 1 |       | 0.00 |   |   |      | 0.00 |   |   |
| Q8N6L0 | Protein KASH5 OS=Homo sapiens GN:      | 0.00  |      |   |   | 4.10  | 2.85 | 1 | 1 |      | 0.00 |   |   |
| Q9NW75 | G patch domain-containir               | 4.28  | 2.84 | 1 | 1 |       | 0.00 |   |   |      | 0.00 |   |   |

|        |                                                     |       |      |   |   |       |      |   |       |       |      |   |
|--------|-----------------------------------------------------|-------|------|---|---|-------|------|---|-------|-------|------|---|
| Q03252 | Lamin-B2 OS=Homo sapiens GN=LMM                     | 0.00  |      |   |   | 0.00  |      |   | 4.63  | 2.83  | 1    | 1 |
| Q8NF37 | Lysophosphatidylcholine acyltransferase             | 0.00  |      |   |   | 4.38  | 2.81 | 1 | 1     | 0.00  |      |   |
| Q4KMQ1 | Taperin OS=Homo sapiens                             | 4.34  | 2.53 | 1 | 1 |       | 0.00 |   | 10.01 | 2.81  | 2    | 2 |
| P36915 | Guanine nucleotide-binding protein                  | 4.66  | 2.80 | 1 | 1 |       | 0.00 |   |       | 0.00  |      |   |
| Q13573 | SNW domain-containing protein 1 OS=Homo sapiens     | 0.00  |      |   |   |       | 0.00 |   | 4.32  | 2.80  | 1    | 1 |
| P52306 | Rap1 GTPase-GDP dissociation stimulator             | 0.00  |      |   |   |       | 0.00 |   | 5.02  | 2.80  | 1    | 1 |
| Q16850 | Lanosterol 14-alpha demethylase                     | 5.12  | 2.78 | 1 | 1 | 4.82  | 2.78 | 1 | 1     | 4.31  | 2.78 | 1 |
| P01024 | Complement C3 OS=Homo sapiens                       | 14.38 | 2.77 | 2 | 3 | 4.89  | 1.44 | 1 | 1     | 5.42  | 1.44 | 1 |
| Q9H223 | EH domain-containing protein 4 OS=Homo sapiens      | 0.00  |      |   |   | 4.26  | 2.77 | 1 | 1     | 4.78  | 2.77 | 1 |
| Q9UDY2 | Tight junction protein ZO-1                         | 5.80  | 2.77 | 1 | 1 |       | 0.00 |   |       | 0.00  |      |   |
| Q3KQV9 | UDP-N-acetylhexosamine 4-epimerase                  | 4.20  | 2.76 | 1 | 1 |       | 0.00 |   | 4.33  | 2.76  | 1    | 1 |
| A6NLF2 | RNA polymerase II transcription factor              | 0.00  |      |   |   |       | 0.00 |   | 4.41  | 2.75  | 1    | 1 |
| P09622 | Dihydrolipoyl dehydrogenase, mitochondrial          | 0.00  |      |   |   | 4.03  | 2.75 | 1 | 1     | 0.00  |      |   |
| Q17RY0 | Cytoplasmic polyadenylation element-binding protein | 0.00  |      |   |   |       | 0.00 |   | 4.16  | 2.74  | 1    | 1 |
| P46060 | Ran GTPase-activating protein                       | 5.08  | 2.73 | 1 | 1 |       | 0.00 |   | 4.95  | 2.73  | 1    | 1 |
| Q9H6R4 | Nucleolar protein 6 OS=Homo sapiens                 | 5.28  | 2.71 | 1 | 1 |       | 0.00 |   |       | 0.00  |      |   |
| Q14980 | Nuclear mitotic apparatus protein 1 OS=Homo sapiens | 0.00  |      |   |   |       | 0.00 |   | 14.25 | 2.70  | 3    | 3 |
| O43815 | Striatin OS=Homo sapiens                            | 4.96  | 2.69 | 1 | 1 |       | 0.00 |   |       | 0.00  |      |   |
| E9PAV3 | Nascent polypeptide-associated complex              | 9.15  | 1.35 | 2 | 2 | 17.22 | 2.02 | 3 | 4     | 17.45 | 2.69 | 4 |
| Q92800 | Histone-lysine N-methyltransferase EZH2             | 0.00  |      |   |   | 3.92  | 2.68 | 1 | 1     | 0.00  |      |   |
| Q9NZB2 | Constitutive coactivator of transcription           | 8.44  | 2.68 | 2 | 2 |       | 0.00 |   |       | 0.00  |      |   |
| Q68E01 | Integrator complex subunit 3 OS=Homo sapiens        | 0.00  |      |   |   |       | 0.00 |   | 4.69  | 2.68  | 1    | 1 |
| P37198 | Nuclear pore glycoprotein P1                        | 4.41  | 2.68 | 1 | 1 |       | 0.00 |   |       | 0.00  |      |   |
| Q96AX1 | Vacuolar protein sorting-associated protein 39      | 0.00  |      |   |   | 5.14  | 2.68 | 1 | 1     | 0.00  |      |   |
| Q99767 | Amyloid beta A4 precursor protein-binding protein 1 | 0.00  |      |   |   | 4.68  | 2.67 | 1 | 1     | 4.43  | 2.67 | 1 |
| P10909 | Clusterin OS=Homo sapiens                           | 3.88  | 2.67 | 1 | 1 |       | 0.00 |   |       | 0.00  |      |   |
| O75027 | ATP-binding cassette sub-family B member 4          | 0.00  |      |   |   | 4.87  | 2.66 | 1 | 1     | 4.80  | 2.66 | 1 |
| Q8IUR6 | CREB3 regulatory factor OS=Homo sapiens             | 0.00  |      |   |   | 3.92  | 2.66 | 1 | 1     | 0.00  |      |   |
| O95453 | Poly(A)-specific ribonuclease P                     | 3.84  | 2.66 | 1 | 1 |       | 0.00 |   |       | 0.00  |      |   |
| Q9H270 | Vacuolar protein sorting-associated protein 39      | 5.22  | 2.66 | 1 | 1 |       | 0.00 |   |       | 0.00  |      |   |
| Q6P1M3 | Lethal(2) giant larvae protein homolog              | 0.00  |      |   |   |       | 0.00 |   | 5.78  | 2.65  | 1    | 1 |
| O43615 | Mitochondrial import inner membrane                 | 4.06  | 2.65 | 1 | 1 |       | 0.00 |   | 4.18  | 2.65  | 1    | 1 |
| O00533 | Neural cell adhesion molecule L1-like protein       | 0.00  |      |   |   |       | 0.00 |   | 5.23  | 2.65  | 1    | 1 |
| Q92731 | Estrogen receptor beta OS=Homo sapiens              | 0.00  |      |   |   | 4.05  | 2.64 | 1 | 1     | 0.00  |      |   |
| P49790 | Nuclear pore complex protein NUP133                 | 4.00  | 1.42 | 1 | 1 |       | 0.00 |   | 5.50  | 1.22  | 1    | 1 |
| Q5T0N5 | Formin-binding protein 1-like OS=Homo sapiens       | 0.00  |      |   |   |       | 0.00 |   | 4.27  | 2.64  | 1    | 1 |
| P02771 | Alpha-fetoprotein OS=Homo sapiens                   | 10.35 | 2.63 | 1 | 2 | 10.68 | 2.63 | 1 | 2     | 10.69 | 2.63 | 1 |
| O94826 | Mitochondrial import receptor                       | 3.86  | 2.63 | 1 | 1 |       | 0.00 |   |       | 0.00  |      |   |
| Q9BSC4 | Nucleolar protein 10 OS=Homo sapiens                | 4.59  | 2.62 | 1 | 1 |       | 0.00 |   |       | 0.00  |      |   |

|        |                                          |       |      |   |   |      |      |   |   |      |      |   |   |
|--------|------------------------------------------|-------|------|---|---|------|------|---|---|------|------|---|---|
| Q14839 | Chromodomain-helicase-l                  | 9.76  | 1.94 | 2 | 2 | 8.26 | 1.78 | 2 | 2 | 5.52 | 1.10 | 1 | 1 |
| Q9H4G0 | Band 4.1-like protein 1 OS=Homo sap      | 0.00  |      |   |   |      | 0.00 |   |   | 4.35 | 2.61 | 1 | 1 |
| Q70EK8 | Inactive ubiquitin carboxy               | 5.24  | 2.61 | 1 | 1 |      | 0.00 |   |   |      | 0.00 |   |   |
| Q9Y6W5 | Wiskott-Aldrich syndrome                 | 4.05  | 2.61 | 1 | 1 |      | 0.00 |   |   | 4.23 | 2.61 | 1 | 1 |
| P49419 | Alpha-aminoadipic semial                 | 4.30  | 2.60 | 1 | 1 |      | 0.00 |   |   |      | 0.00 |   |   |
| Q9UMF0 | Intercellular adhesion mo                | 4.86  | 2.60 | 1 | 1 |      | 0.00 |   |   |      | 0.00 |   |   |
| Q9C0B0 | RING finger protein unkempt homolog      | 0.00  |      |   |   |      | 0.00 |   |   | 4.28 | 2.59 | 1 | 1 |
| P55884 | Eukaryotic translation initiation factor | 0.00  |      |   |   | 4.68 | 2.58 | 1 | 1 |      | 0.00 |   |   |
| P35241 | Radixin OS=Homo sapiens GN=RDX P         | 0.00  |      |   |   |      | 0.00 |   |   | 4.70 | 2.57 | 1 | 1 |
| Q9Y2J8 | Protein-arginine deiminase               | 4.83  | 2.56 | 1 | 1 | 5.35 | 2.56 | 1 | 1 | 4.60 | 2.56 | 1 | 1 |
| Q9H6T3 | RNA polymerase II-assoc                  | 4.48  | 2.56 | 1 | 1 | 4.89 | 2.56 | 1 | 1 |      | 0.00 |   |   |
| Q2TB10 | Zinc finger protein 800 OS=Homo sap      | 0.00  |      |   |   |      | 0.00 |   |   | 4.70 | 2.56 | 1 | 1 |
| O15371 | Eukaryotic translation init              | 4.40  | 2.55 | 1 | 1 |      | 0.00 |   |   |      | 0.00 |   |   |
| P04745 | Alpha-amylase 1 OS=Hor                   | 3.99  | 2.54 | 1 | 1 |      | 0.00 |   |   |      | 0.00 |   |   |
| Q6P995 | Protein FAM171B OS=Homo sapiens C        | 0.00  |      |   |   | 5.18 | 2.54 | 1 | 1 |      | 0.00 |   |   |
| Q9P265 | Disco-interacting protein                | 4.01  | 1.14 | 1 | 1 | 3.93 | 1.40 | 1 | 1 | 4.41 | 1.40 | 1 | 1 |
| Q9UFB7 | Zinc finger and BTB domain-containing    | 0.00  |      |   |   | 4.02 | 2.54 | 1 | 1 |      | 0.00 |   |   |
| O60488 | Long-chain-fatty-acid--Co                | 4.42  | 2.53 | 1 | 1 | 4.07 | 2.53 | 1 | 1 |      | 0.00 |   |   |
| O76094 | Signal recognition particle subunit SRF  | 0.00  |      |   |   | 9.34 | 2.53 | 1 | 2 | 4.85 | 2.53 | 1 | 1 |
| P08243 | Asparagine synthetase [glutamine-hyc     | 0.00  |      |   |   |      | 0.00 |   |   | 4.24 | 2.50 | 1 | 1 |
| Q08379 | Golgin subfamily A memb                  | 5.03  | 2.50 | 1 | 1 |      | 0.00 |   |   |      | 0.00 |   |   |
| Q9UKW4 | Guanine nucleotide exchange factor V     | 0.00  |      |   |   |      | 0.00 |   |   | 4.29 | 2.48 | 1 | 1 |
| P04843 | Dolichyl-diphosphooligosaccharide--pr    | 0.00  |      |   |   | 4.11 | 2.47 | 1 | 1 |      | 0.00 |   |   |
| P02461 | Collagen alpha-1(III) chain OS=Homo      | 0.00  |      |   |   | 4.70 | 2.46 | 1 | 1 |      | 0.00 |   |   |
| Q13219 | Pappalysin-1 OS=Homo s                   | 5.31  | 2.46 | 1 | 1 |      | 0.00 |   |   |      | 0.00 |   |   |
| O95831 | Apoptosis-inducing factor 1, mitochon    | 0.00  |      |   |   |      | 0.00 |   |   | 4.22 | 2.45 | 1 | 1 |
| P08237 | ATP-dependent 6-phosph                   | 8.84  | 2.44 | 1 | 2 |      | 0.00 |   |   | 4.15 | 2.44 | 1 | 1 |
| O95644 | Nuclear factor of activate               | 4.73  | 2.44 | 1 | 1 |      | 0.00 |   |   |      | 0.00 |   |   |
| O75694 | Nuclear pore complex pro                 | 8.59  | 2.44 | 2 | 2 | 4.27 | 1.22 | 1 | 1 | 4.73 | 1.22 | 1 | 1 |
| Q99615 | DnaJ homolog subfamily C member 7        | 0.00  |      |   |   |      | 0.00 |   |   | 4.19 | 2.43 | 1 | 1 |
| Q9H845 | Acyl-CoA dehydrogenase family memb       | 0.00  |      |   |   | 4.26 | 2.42 | 1 | 1 | 4.47 | 2.42 | 1 | 1 |
| P10155 | 60 kDa SS-A/Ro ribonucle                 | 4.09  | 2.42 | 1 | 1 |      | 0.00 |   |   |      | 0.00 |   |   |
| Q8NCL4 | Polypeptide N-acetylgalactosaminyltra    | 0.00  |      |   |   |      | 0.00 |   |   | 4.97 | 2.41 | 1 | 1 |
| Q4G0J3 | La-related protein 7 OS=                 | 3.97  | 2.41 | 1 | 1 |      | 0.00 |   |   |      | 0.00 |   |   |
| Q6P996 | Pyridoxal-dependent deca                 | 5.75  | 2.41 | 1 | 1 | 5.54 | 2.41 | 1 | 1 | 5.61 | 2.41 | 1 | 1 |
| P49589 | Cysteine--tRNA ligase, cytoplasmic OS    | 0.00  |      |   |   |      | 0.00 |   |   | 4.78 | 2.41 | 1 | 1 |
| Q9GZY0 | Nuclear RNA export facto                 | 4.23  | 2.40 | 1 | 1 |      | 0.00 |   |   |      | 0.00 |   |   |
| Q9Y3Z3 | Deoxynucleoside triphosp                 | 4.73  | 2.40 | 1 | 1 | 4.09 | 2.40 | 1 | 1 |      | 0.00 |   |   |
| Q15063 | Periostin OS=Homo sapie                  | 10.61 | 2.39 | 1 | 2 | 4.34 | 2.39 | 1 | 1 |      | 0.00 |   |   |

|         |                                        |      |      |   |   |       |      |   |      |      |      |   |   |
|---------|----------------------------------------|------|------|---|---|-------|------|---|------|------|------|---|---|
| A6NFBQ2 | Protein FAM115C OS=Homo sapiens C      | 0.00 |      |   |   | 0.00  |      |   | 4.13 | 2.39 | 1    | 1 |   |
| Q15849  | Urea transporter 2 OS=Homo sapiens     | 0.00 |      |   |   | 0.00  |      |   | 4.64 | 2.39 | 1    | 1 |   |
| Q12797  | Aspartyl/asparaginyl beta              | 5.19 | 2.37 | 1 | 1 | 0.00  |      |   | 5.70 | 2.37 | 1    | 1 |   |
| P06400  | Retinoblastoma-associated protein OS   | 0.00 |      |   |   | 0.00  |      |   | 4.27 | 2.37 | 1    | 1 |   |
| P41743  | Protein kinase C iota type OS=Homo s   | 0.00 |      |   |   | 0.00  |      |   | 4.10 | 2.35 | 1    | 1 |   |
| Q9UJC3  | Protein Hook homolog 1 (               | 4.47 | 2.34 | 1 | 1 | 0.00  |      |   | 4.94 | 2.34 | 1    | 1 |   |
| Q7L804  | Rab11 family-interacting protein 2 OS  | 0.00 |      |   |   | 4.34  | 2.34 | 1 | 1    | 4.32 | 2.34 | 1 | 1 |
| Q9UBT2  | SUMO-activating enzyme                 | 4.10 | 2.34 | 1 | 1 | 0.00  |      |   |      | 0.00 |      |   |   |
| Q86Y56  | Dynein assembly factor 5, axonemal C   | 0.00 |      |   |   | 5.34  | 2.34 | 1 | 1    | 5.75 | 2.34 | 1 | 1 |
| Q9NY61  | Protein AATF OS=Homo s                 | 4.41 | 2.32 | 1 | 1 | 0.00  |      |   | 4.25 | 2.32 | 1    | 1 |   |
| Q96ST2  | Protein IWS1 homolog O                 | 4.50 | 2.32 | 1 | 1 | 0.00  |      |   |      | 0.00 |      |   |   |
| Q96EY7  | Pentatricopeptide repeat               | 4.70 | 2.32 | 1 | 1 | 10.53 | 2.32 | 1 | 2    |      | 0.00 |   |   |
| Q6P4Q7  | Metal transporter CNNM4 OS=Homo s      | 0.00 |      |   |   | 0.00  |      |   | 4.92 | 2.32 | 1    | 1 |   |
| Q9NQX3  | Gephyrin OS=Homo sapi                  | 3.91 | 2.31 | 1 | 1 | 0.00  |      |   | 4.63 | 2.31 | 1    | 1 |   |
| O43264  | Centromere/kinetochore                 | 4.80 | 2.31 | 1 | 1 | 0.00  |      |   | 4.20 | 2.31 | 1    | 1 |   |
| A6NDK9  | Putative golgin subfamily A member 6   | 0.00 |      |   |   | 0.00  |      |   | 4.15 | 2.31 | 1    | 1 |   |
| Q9H0M4  | Zinc finger CW-type PWWP domain pr     | 0.00 |      |   |   | 0.00  |      |   | 4.67 | 2.31 | 1    | 1 |   |
| Q05209  | Tyrosine-protein phosphat              | 4.31 | 2.31 | 1 | 1 | 4.40  | 2.31 | 1 | 1    |      | 0.00 |   |   |
| Q92615  | La-related protein 4B OS=Homo sapie    | 0.00 |      |   |   | 0.00  |      |   | 4.33 | 2.30 | 1    | 1 |   |
| Q9NVC6  | Mediator of RNA polymerase II transc   | 0.00 |      |   |   | 4.23  | 2.30 | 1 | 1    |      | 0.00 |   |   |
| Q06210  | Glutamine--fructose-6-phosphate amir   | 0.00 |      |   |   | 4.62  | 2.29 | 1 | 1    | 5.05 | 2.29 | 1 | 1 |
| Q8IVT5  | Kinase suppressor of Ras 1 OS=Homo     | 0.00 |      |   |   | 0.00  |      |   | 4.61 | 2.28 | 1    | 1 |   |
| O00139  | Kinesin-like protein KIF2A OS=Homo s   | 0.00 |      |   |   | 0.00  |      |   | 4.44 | 2.27 | 1    | 1 |   |
| O95359  | Transforming acidic coile              | 9.36 | 1.32 | 2 | 2 | 9.34  | 1.56 | 2 | 2    | 4.55 | 0.61 | 1 | 1 |
| Q8NBJ5  | Procollagen galactosyltransferase 1 O  | 0.00 |      |   |   | 0.00  |      |   | 8.25 | 2.25 | 1    | 2 |   |
| O43719  | HIV Tat-specific factor 1 OS=Homo sa   | 0.00 |      |   |   | 0.00  |      |   | 4.63 | 2.25 | 1    | 1 |   |
| O43290  | U4/U6.U5 tri-snRNP-associated protei   | 0.00 |      |   |   | 0.00  |      |   | 5.33 | 2.25 | 1    | 1 |   |
| Q9UBY0  | Sodium/hydrogen exchanger 2 OS=Ho      | 0.00 |      |   |   | 4.07  | 2.22 | 1 | 1    |      | 0.00 |   |   |
| Q93084  | Sarcoplasmic/endoplasmic reticulum c   | 0.00 |      |   |   | 0.00  |      |   | 5.90 | 2.21 | 1    | 1 |   |
| P52701  | DNA mismatch repair protein Msh6 OS    | 0.00 |      |   |   | 8.92  | 2.21 | 2 | 2    | 4.28 | 0.88 | 1 | 1 |
| P50416  | Carnitine O-palmitoyltran              | 5.08 | 2.20 | 1 | 1 | 5.93  | 2.20 | 1 | 1    | 5.52 | 2.20 | 1 | 1 |
| Q5T7W0  | Zinc finger protein 618 OS=Homo sap    | 0.00 |      |   |   | 0.00  |      |   | 4.12 | 2.20 | 1    | 1 |   |
| P49023  | Paxillin OS=Homo sapien                | 4.46 | 2.20 | 1 | 1 | 0.00  |      |   |      | 0.00 |      |   |   |
| P33402  | Guanylate cyclase soluble subunit alph | 0.00 |      |   |   | 0.00  |      |   | 4.13 | 2.19 | 1    | 1 |   |
| Q16822  | Phosphoenolpyruvate car                | 3.98 | 2.19 | 1 | 1 | 0.00  |      |   |      | 0.00 |      |   |   |
| Q92621  | Nuclear pore complex protein Nup205    | 0.00 |      |   |   | 5.27  | 1.39 | 1 | 1    | 4.30 | 0.80 | 1 | 1 |
| Q6ZVT6  | Uncharacterized protein C3orf67 OS=l   | 0.00 |      |   |   | 3.94  | 2.18 | 1 | 1    |      | 0.00 |   |   |
| P84550  | SKI family transcriptional corepressor | 0.00 |      |   |   | 0.00  |      |   | 4.10 | 2.18 | 1    | 1 |   |
| Q6PJT7  | Zinc finger CCCH domain-containing p   | 0.00 |      |   |   | 0.00  |      |   | 4.18 | 2.17 | 1    | 1 |   |

|        |                                         |      |      |   |      |       |      |   |      |       |      |   |   |
|--------|-----------------------------------------|------|------|---|------|-------|------|---|------|-------|------|---|---|
| Q9Y592 | Centrosomal protein of 83 kDa OS=Hc     | 0.00 |      |   |      | 0.00  |      |   | 4.10 | 2.16  | 1    | 1 |   |
| Q96KP1 | Exocyst complex component 2 OS=Hc       | 0.00 |      |   | 4.57 | 2.16  | 1    | 1 |      | 0.00  |      |   |   |
| O75382 | Tripartite motif-containing             | 4.30 | 2.15 | 1 | 1    |       |      |   |      | 0.00  |      |   |   |
| P13671 | Complement component C6 OS=Homo         | 0.00 |      |   | 3.93 | 2.14  | 1    | 1 |      | 0.00  |      |   |   |
| Q8IXB1 | DnaJ homolog subfamily C member 1       | 0.00 |      |   | 4.11 | 2.14  | 1    | 1 |      | 0.00  |      |   |   |
| Q13214 | Semaphorin-3B OS=Homo sapiens GN        | 0.00 |      |   | 3.96 | 2.14  | 1    | 1 |      | 0.00  |      |   |   |
| Q5T4S7 | E3 ubiquitin-protein ligase             | 9.74 | 1.00 | 2 | 2    | 4.82  | 0.56 | 1 | 1    | 5.22  | 0.58 | 1 | 1 |
| P43243 | Matrin-3 OS=Homo sapiens GN=MATI        | 0.00 |      |   | 4.46 | 2.13  | 1    | 1 |      | 0.00  |      |   |   |
| P23229 | Integrin alpha-6 OS=Homo sapiens GI     | 0.00 |      |   |      | 0.00  |      |   | 5.17 | 2.12  | 1    | 1 |   |
| Q14008 | Cytoskeleton-associated p               | 4.24 | 0.69 | 1 | 1    |       |      |   | 5.19 | 1.43  | 1    | 1 |   |
| P02751 | Fibronectin OS=Homo sa                  | 9.67 | 1.38 | 2 | 2    | 4.45  | 0.71 | 1 | 1    |       | 0.00 |   |   |
| P17480 | Nucleolar transcription factor 1 OS=Hc  | 0.00 |      |   |      | 0.00  |      |   | 4.50 | 2.09  | 1    | 1 |   |
| Q86Y38 | Xylosyltransferase 1 OS=                | 4.09 | 2.09 | 1 | 1    |       | 0.00 |   |      | 0.00  |      |   |   |
| P54577 | Tyrosine--tRNA ligase, cy               | 3.94 | 2.08 | 1 | 1    |       | 0.00 |   |      | 0.00  |      |   |   |
| Q9NQI0 | Probable ATP-dependent RNA helicase     | 0.00 |      |   |      |       | 0.00 |   | 4.31 | 2.07  | 1    | 1 |   |
| Q9NZT2 | Opioid growth factor rece               | 3.86 | 2.07 | 1 | 1    |       | 0.00 |   |      | 0.00  |      |   |   |
| O75182 | Paired amphipathic helix                | 4.85 | 2.07 | 1 | 1    |       | 0.00 |   |      | 0.00  |      |   |   |
| Q14258 | E3 ubiquitin/ISG15 ligase               | 4.61 | 2.06 | 1 | 1    |       | 0.00 |   |      | 0.00  |      |   |   |
| Q9H7Z3 | Protein NRDE2 homolog OS=Homo sa        | 0.00 |      |   |      | 4.72  | 2.06 | 1 | 1    |       | 0.00 |   |   |
| Q8IYB8 | ATP-dependent RNA helicase SUPV3L       | 0.00 |      |   |      | 4.16  | 2.04 | 1 | 1    |       | 0.00 |   |   |
| O60242 | Brain-specific angiogenesis inhibitor 3 | 0.00 |      |   |      | 5.19  | 2.04 | 1 | 1    |       | 0.00 |   |   |
| Q6PL18 | ATPase family AAA domain-containing     | 0.00 |      |   |      | 9.10  | 2.01 | 2 | 2    | 4.61  | 1.08 | 1 | 1 |
| Q8IW93 | Rho guanine nucleotide exchange fact    | 0.00 |      |   |      | 4.05  | 2.00 | 1 | 1    |       | 0.00 |   |   |
| Q99459 | Cell division cycle 5-like p            | 4.07 | 2.00 | 1 | 1    |       | 0.00 |   |      | 0.00  |      |   |   |
| Q8IZ83 | Aldehyde dehydrogenase family 16 m      | 0.00 |      |   |      |       | 0.00 |   | 4.91 | 2.00  | 1    | 1 |   |
| Q9Y6T7 | Diacylglycerol kinase beta              | 4.11 | 1.99 | 1 | 1    |       | 0.00 |   |      | 0.00  |      |   |   |
| Q86YT6 | E3 ubiquitin-protein ligase MIB1 OS=H   | 0.00 |      |   |      | 4.17  | 1.99 | 1 | 1    |       | 0.00 |   |   |
| Q6WCQ1 | Myosin phosphatase Rho                  | 3.88 | 1.95 | 1 | 1    |       | 0.00 |   |      | 0.00  |      |   |   |
| P52735 | Guanine nucleotide exchange factor V    | 0.00 |      |   |      |       | 0.00 |   | 4.48 | 1.94  | 1    | 1 |   |
| P35658 | Nuclear pore complex pro                | 4.11 | 1.05 | 1 | 1    | 4.03  | 1.05 | 1 | 1    | 5.09  | 0.86 | 1 | 1 |
| P35221 | Catenin alpha-1 OS=Horr                 | 4.36 | 1.88 | 1 | 1    |       | 0.00 |   |      | 0.00  |      |   |   |
| Q8IZL8 | Proline-, glutamic acid- ar             | 4.34 | 1.86 | 1 | 1    | 4.00  | 1.86 | 1 | 1    |       | 0.00 |   |   |
| P12109 | Collagen alpha-1(VI) cha                | 5.32 | 1.85 | 1 | 1    | 10.87 | 1.85 | 1 | 2    | 11.52 | 1.85 | 1 | 2 |
| O75152 | Zinc finger CCCH domain-containing p    | 0.00 |      |   |      | 4.13  | 1.85 | 1 | 1    |       | 0.00 |   |   |
| P57740 | Nuclear pore complex pro                | 4.98 | 1.84 | 1 | 1    |       | 0.00 |   |      | 0.00  |      |   |   |
| P28290 | Sperm-specific antigen 2                | 4.02 | 1.83 | 1 | 1    |       | 0.00 |   |      | 0.00  |      |   |   |
| P07384 | Calpain-1 catalytic subuni              | 4.02 | 1.82 | 1 | 1    |       | 0.00 |   |      | 0.00  |      |   |   |
| P55011 | Solute carrier family 12 member 2 OS    | 0.00 |      |   |      |       | 0.00 |   | 4.30 | 1.82  | 1    | 1 |   |
| Q86XP3 | ATP-dependent RNA helic                 | 3.90 | 1.81 | 1 | 1    |       | 0.00 |   |      | 0.00  |      |   |   |

|        |                                                |      |      |   |   |      |      |   |   |      |      |   |   |
|--------|------------------------------------------------|------|------|---|---|------|------|---|---|------|------|---|---|
| Q8TCU6 | Phosphatidylinositol 3,4,5                     | 4.84 | 1.81 | 1 | 1 |      | 0.00 |   |   |      | 0.00 |   |   |
| O94906 | Pre-mRNA-processing factor 6 OS=Hc             |      | 0.00 |   |   | 4.85 | 1.81 | 1 | 1 |      | 0.00 |   |   |
| P52732 | Kinesin-like protein KIF11 OS=Homo s           |      | 0.00 |   |   |      | 0.00 |   |   | 4.35 | 1.80 | 1 | 1 |
| P17844 | Probable ATP-dependent RNA helicase            |      | 0.00 |   |   |      | 0.00 |   |   | 4.11 | 1.79 | 1 | 1 |
| Q96RQ3 | Methylcrotonoyl-CoA carboxylase                | 4.65 | 1.79 | 1 | 1 | 4.26 | 1.79 | 1 | 1 | 4.40 | 1.79 | 1 | 1 |
| Q7Z410 | Transmembrane protease serine 9 OS=Hc          |      | 0.00 |   |   |      | 0.00 |   |   | 4.29 | 1.79 | 1 | 1 |
| Q658Y4 | Protein FAM91A1 OS=Homo sapiens C              |      | 0.00 |   |   | 4.60 | 1.79 | 1 | 1 |      | 0.00 |   |   |
| Q6VY07 | Phosphofurin acidic cluster sorting pro        |      | 0.00 |   |   |      | 0.00 |   |   | 4.38 | 1.77 | 1 | 1 |
| Q5JTH9 | RRP12-like protein OS=Homo sapiens             |      | 0.00 |   |   |      | 0.00 |   |   | 5.55 | 1.77 | 1 | 1 |
| Q9NSV4 | Protein diaphanous homologue 1 OS=Hc           | 3.86 | 1.76 | 1 | 1 |      | 0.00 |   |   |      | 0.00 |   |   |
| Q13563 | Polycystin-2 OS=Homo sapiens                   | 4.22 | 1.76 | 1 | 1 |      | 0.00 |   |   |      | 0.00 |   |   |
| Q15003 | Condensin complex subunit 2 OS=Homo s          |      | 0.00 |   |   |      | 0.00 |   |   | 4.70 | 1.75 | 1 | 1 |
| Q99613 | Eukaryotic translation initiation factor 4E    | 5.49 | 1.75 | 1 | 1 | 8.72 | 1.75 | 1 | 2 | 5.54 | 1.75 | 1 | 1 |
| Q9BUJ2 | Heterogeneous nuclear ribonucleoprotein        | 5.37 | 1.75 | 1 | 1 | 4.76 | 1.75 | 1 | 1 |      | 0.00 |   |   |
| O15381 | Nuclear valosin-containing protein             | 3.93 | 1.75 | 1 | 1 | 4.50 | 1.75 | 1 | 1 |      | 0.00 |   |   |
| P46459 | Vesicle-fusing ATPase OS=Homo sapiens          | 4.77 | 1.75 | 1 | 1 | 4.37 | 1.75 | 1 | 1 |      | 0.00 |   |   |
| P52789 | Hexokinase-2 OS=Homo sapiens GN=Hc             |      | 0.00 |   |   | 5.38 | 1.74 | 1 | 1 |      | 0.00 |   |   |
| Q96P70 | Importin-9 OS=Homo sapiens                     | 5.16 | 1.73 | 1 | 1 | 4.75 | 1.73 | 1 | 1 | 5.59 | 1.73 | 1 | 1 |
| Q9H2P0 | Activity-dependent neuroleukin                 | 3.90 | 1.72 | 1 | 1 |      | 0.00 |   |   | 4.59 | 1.72 | 1 | 1 |
| Q6P3W7 | SCY1-like protein 2 OS=Homo sapiens            | 3.85 | 1.72 | 1 | 1 |      | 0.00 |   |   |      | 0.00 |   |   |
| P49747 | Cartilage oligomeric matrix protein            | 3.95 | 1.72 | 1 | 1 |      | 0.00 |   |   |      | 0.00 |   |   |
| Q6NSJ2 | Pleckstrin homology-like domain containing     | 3.84 | 1.72 | 1 | 1 |      | 0.00 |   |   |      | 0.00 |   |   |
| Q01804 | OTU domain-containing protein                  | 3.99 | 1.71 | 1 | 1 |      | 0.00 |   |   |      | 0.00 |   |   |
| Q9Y4F5 | Centrosomal protein of 110 kDa                 | 4.94 | 1.70 | 1 | 1 |      | 0.00 |   |   |      | 0.00 |   |   |
| Q6Y7W6 | PERQ amino acid-rich with GYF domain           |      | 0.00 |   |   |      | 0.00 |   |   | 5.23 | 1.69 | 1 | 1 |
| Q8IX07 | Zinc finger protein ZFPM1 OS=Homo sapiens      |      | 0.00 |   |   |      | 0.00 |   |   | 4.15 | 1.69 | 1 | 1 |
| Q5JTC6 | APC membrane recruitment protein 1             |      | 0.00 |   |   | 3.93 | 1.67 | 1 | 1 |      | 0.00 |   |   |
| P78524 | Suppression of tumorigenesis 1                 | 3.82 | 1.67 | 1 | 1 |      | 0.00 |   |   |      | 0.00 |   |   |
| Q9NYA4 | Myotubularin-related protein 4 OS=Homo s       |      | 0.00 |   |   | 3.98 | 1.67 | 1 | 1 |      | 0.00 |   |   |
| Q13200 | 26S proteasome non-ATPase regulatory subunit 1 |      | 0.00 |   |   | 4.05 | 1.65 | 1 | 1 | 5.18 | 1.65 | 1 | 1 |
| P53992 | Protein transport protein                      | 4.17 | 1.65 | 1 | 1 |      | 0.00 |   |   |      | 0.00 |   |   |
| O95373 | Importin-7 OS=Homo sapiens GN=IPN              |      | 0.00 |   |   |      | 0.00 |   |   | 5.08 | 1.64 | 1 | 1 |
| Q15459 | Splicing factor 3A subunit 1 OS=Homo sapiens   |      | 0.00 |   |   |      | 0.00 |   |   | 4.42 | 1.64 | 1 | 1 |
| Q6UB35 | Monofunctional C1-tetrahydrofolate synthase    |      | 0.00 |   |   |      | 0.00 |   |   | 4.28 | 1.64 | 1 | 1 |
| A0FGR8 | Extended synaptotagmin-1                       | 4.16 | 1.63 | 1 | 1 |      | 0.00 |   |   |      | 0.00 |   |   |
| Q14676 | Mediator of DNA damage checkpoint protein 1    |      | 0.00 |   |   | 4.74 | 1.63 | 1 | 1 |      | 0.00 |   |   |
| Q9Y4E8 | Ubiquitin carboxyl-terminal hydrolase 1        | 4.26 | 1.63 | 1 | 1 |      | 0.00 |   |   |      | 0.00 |   |   |
| O15020 | Spectrin beta chain, non-erythrocyte           | 4.45 | 0.84 | 1 | 1 | 5.11 | 0.84 | 1 | 1 | 4.59 | 0.79 | 1 | 1 |
| Q9Y6D5 | Brefeldin A-inhibited guanine nucleotide       | 8.16 | 1.62 | 2 | 2 |      | 0.00 |   |   | 5.27 | 0.84 | 1 | 1 |

|        |                                        |      |      |   |   |       |      |   |      |       |      |   |   |
|--------|----------------------------------------|------|------|---|---|-------|------|---|------|-------|------|---|---|
| Q12788 | Transducin beta-like protein 3 OS=Ho   | 0.00 |      |   |   | 0.00  |      |   | 4.54 | 1.61  | 1    | 1 |   |
| Q9NQW6 | Actin-binding protein anillin OS=Homc  | 0.00 |      |   |   | 0.00  |      |   | 4.53 | 1.60  | 1    | 1 |   |
| Q5SNT6 | WASH complex subunit FAM21B OS=H       | 0.00 |      |   |   | 0.00  |      |   | 5.03 | 1.60  | 1    | 1 |   |
| Q9Y3P9 | Rab GTPase-activating pr               | 4.36 | 1.59 | 1 | 1 | 0.00  |      |   |      | 0.00  |      |   |   |
| Q9NPG3 | Ubinuclein-1 OS=Homo sapiens GN=L      | 0.00 |      |   |   | 0.00  |      |   | 4.15 | 1.59  | 1    | 1 |   |
| Q9H3U1 | Protein unc-45 homolog /               | 3.88 | 1.59 | 1 | 1 | 0.00  |      |   |      | 0.00  |      |   |   |
| Q5JRA6 | Melanoma inhibitory activ              | 4.99 | 0.89 | 1 | 1 | 4.10  | 0.68 | 1 | 1    |       | 0.00 |   |   |
| Q9BZH6 | WD repeat-containing protein 11 OS=    | 0.00 |      |   |   | 0.00  |      |   | 5.42 | 1.55  | 1    | 1 |   |
| Q6PKG0 | La-related protein 1 OS=               | 4.99 | 1.55 | 1 | 1 | 0.00  |      |   | 5.05 | 1.55  | 1    | 1 |   |
| Q9BYX2 | TBC1 domain family member 2A OS=I      | 0.00 |      |   |   | 0.00  |      |   | 4.31 | 1.51  | 1    | 1 |   |
| Q9UPN9 | E3 ubiquitin-protein ligase TRIM33 OS  | 0.00 |      |   |   | 4.13  | 1.51 | 1 | 1    |       | 0.00 |   |   |
| Q29RF7 | Sister chromatid cohesion protein PDS  | 0.00 |      |   |   | 4.16  | 1.50 | 1 | 1    | 10.43 | 1.50 | 1 | 2 |
| Q14324 | Myosin-binding protein C, fast-type OS | 0.00 |      |   |   | 3.91  | 1.49 | 1 | 1    |       | 0.00 |   |   |
| Q8IX12 | Cell division cycle and ap             | 3.98 | 1.48 | 1 | 1 | 0.00  |      |   |      | 0.00  |      |   |   |
| Q9UHF7 | Zinc finger transcription f            | 5.26 | 1.48 | 1 | 1 | 0.00  |      |   | 4.74 | 1.48  | 1    | 1 |   |
| P27816 | Microtubule-associated pi              | 3.95 | 1.48 | 1 | 1 | 3.95  | 1.48 | 1 | 1    |       | 0.00 |   |   |
| Q8N1F7 | Nuclear pore complex protein Nup93 (   | 0.00 |      |   |   | 4.22  | 1.47 | 1 | 1    |       | 0.00 |   |   |
| P36776 | Lon protease homolog, m                | 4.18 | 1.46 | 1 | 1 | 0.00  |      |   |      | 0.00  |      |   |   |
| O14974 | Protein phosphatase 1 re               | 4.78 | 1.46 | 1 | 1 | 0.00  |      |   |      | 0.00  |      |   |   |
| O43592 | Exportin-T OS=Homo sap                 | 3.88 | 1.46 | 1 | 1 | 0.00  |      |   |      | 0.00  |      |   |   |
| Q9BSJ8 | Extended synaptotagmin-                | 4.88 | 1.45 | 1 | 1 | 0.00  |      |   | 5.29 | 1.45  | 1    | 1 |   |
| P30876 | DNA-directed RNA polymerase II subu    | 0.00 |      |   |   | 0.00  |      |   | 4.65 | 1.45  | 1    | 1 |   |
| P49588 | Alanine--tRNA ligase, cytoplasmic OS=  | 0.00 |      |   |   | 4.01  | 1.45 | 1 | 1    |       | 0.00 |   |   |
| P11498 | Pyruvate carboxylase, mi               | 4.86 | 1.44 | 1 | 1 | 0.00  |      |   |      | 0.00  |      |   |   |
| Q86VH2 | Kinesin-like protein KIF27 OS=Homo s   | 0.00 |      |   |   | 0.00  |      |   | 4.54 | 1.43  | 1    | 1 |   |
| O60264 | SWI/SNF-related matrix-associated ac   | 0.00 |      |   |   | 4.10  | 1.43 | 1 | 1    | 4.15  | 1.43 | 1 | 1 |
| Q8TDI7 | Transmembrane channel-like protein 2   | 0.00 |      |   |   | 0.00  |      |   | 4.29 | 1.43  | 1    | 1 |   |
| P82279 | Protein crumbs homolog                 | 4.00 | 1.42 | 1 | 1 | 0.00  |      |   |      | 0.00  |      |   |   |
| O15067 | Phosphoribosylformylglyc               | 4.11 | 1.42 | 1 | 1 | 0.00  |      |   |      | 0.00  |      |   |   |
| O60610 | Protein diaphanous homc                | 4.99 | 1.42 | 1 | 1 | 10.47 | 1.42 | 1 | 2    |       | 0.00 |   |   |
| Q6ZTY8 | Putative uncharacterized protein C12o  | 0.00 |      |   |   | 4.23  | 1.42 | 1 | 1    |       | 0.00 |   |   |
| Q96KR1 | Zinc finger RNA-binding protein OS=H   | 0.00 |      |   |   | 0.00  |      |   | 4.15 | 1.40  | 1    | 1 |   |
| P49916 | DNA ligase 3 OS=Homo s                 | 4.41 | 1.39 | 1 | 1 | 0.00  |      |   |      | 0.00  |      |   |   |
| P69849 | Nodal modulator 3 OS=Homo sapiens      | 0.00 |      |   |   | 0.00  |      |   | 4.49 | 1.39  | 1    | 1 |   |
| Q9NTI5 | Sister chromatid cohesion protein PDS  | 0.00 |      |   |   | 0.00  |      |   | 4.36 | 1.38  | 1    | 1 |   |
| Q13009 | T-lymphoma invasion anc                | 3.98 | 1.38 | 1 | 1 | 0.00  |      |   |      | 0.00  |      |   |   |
| Q9Y2L1 | Exosome complex exonuclease RRP44      | 0.00 |      |   |   | 4.06  | 1.36 | 1 | 1    | 4.37  | 1.36 | 1 | 1 |
| P49746 | Thrombospondin-3 OS=H                  | 3.91 | 1.36 | 1 | 1 | 0.00  |      |   |      | 0.00  |      |   |   |
| Q15021 | Condensin complex subunit 1 OS=Hor     | 0.00 |      |   |   | 0.00  |      |   | 4.35 | 1.36  | 1    | 1 |   |



|        |                                          |      |      |   |   |      |      |   |      |      |      |   |   |
|--------|------------------------------------------|------|------|---|---|------|------|---|------|------|------|---|---|
| Q9P217 | Zinc finger SWIM domain-containing p     | 0.00 |      |   |   | 0.00 |      |   | 4.19 | 1.35 | 1    | 1 |   |
| Q5JV73 | FERM and PDZ domain-containing pro       | 0.00 |      |   |   | 5.15 | 1.33 | 1 | 1    | 0.00 |      |   |   |
| P51610 | Host cell factor 1 OS=Homo sapiens C     | 0.00 |      |   |   |      | 0.00 |   | 5.52 | 1.33 | 1    | 1 |   |
| Q9UGU0 | Transcription factor 20 O                | 4.04 | 1.33 | 1 | 1 |      | 0.00 |   |      | 0.00 |      |   |   |
| O15084 | Serine/threonine-protein phosphatase     | 0.00 |      |   |   | 4.08 | 1.33 | 1 | 1    | 0.00 |      |   |   |
| P08183 | Multidrug resistance protein 1 OS=Ho     | 0.00 |      |   |   | 4.22 | 1.33 | 1 | 1    | 0.00 |      |   |   |
| Q5T1H1 | Protein eyes shut homolog                | 4.90 | 0.76 | 1 | 1 | 4.00 | 0.57 | 1 | 1    | 0.00 |      |   |   |
| P19827 | Inter-alpha-trypsin inhibit              | 3.93 | 1.32 | 1 | 1 |      | 0.00 |   |      | 0.00 |      |   |   |
| P20908 | Collagen alpha-1(V) chain                | 3.88 | 1.31 | 1 | 1 |      | 0.00 |   |      | 0.00 |      |   |   |
| Q92614 | Unconventional myosin-X                  | 4.05 | 0.73 | 1 | 1 | 3.93 | 0.58 | 1 | 1    | 0.00 |      |   |   |
| Q96J66 | ATP-binding cassette sub                 | 3.90 | 1.30 | 1 | 1 |      | 0.00 |   |      | 0.00 |      |   |   |
| O95239 | Chromosome-associated kinesin KIF4A      | 0.00 |      |   |   | 4.01 | 1.30 | 1 | 1    | 0.00 |      |   |   |
| P22102 | Trifunctional purine biosy               | 5.07 | 1.29 | 1 | 1 | 4.70 | 1.29 | 1 | 1    | 0.00 |      |   |   |
| O60292 | Signal-induced proliferati               | 4.05 | 1.29 | 1 | 1 |      | 0.00 |   |      | 0.00 |      |   |   |
| Q7Z3K3 | Pogo transposable element with ZNF c     | 0.00 |      |   |   |      | 0.00 |   | 4.83 | 1.28 | 1    | 1 |   |
| Q93009 | Ubiquitin carboxyl-terminal hydrolase    | 0.00 |      |   |   |      | 0.00 |   | 4.20 | 1.27 | 1    | 1 |   |
| Q08211 | ATP-dependent RNA helic                  | 3.87 | 1.26 | 1 | 1 |      | 0.00 |   | 4.70 | 1.26 | 1    | 1 |   |
| Q14126 | Desmoglein-2 OS=Homo sapiens GN=         | 0.00 |      |   |   | 4.37 | 1.25 | 1 | 1    | 4.97 | 1.25 | 1 | 1 |
| Q96KQ7 | Histone-lysine N-methyltr                | 3.95 | 1.24 | 1 | 1 |      | 0.00 |   |      | 0.00 |      |   |   |
| A0AVT1 | Ubiquitin-like modifier-activating enzy  | 0.00 |      |   |   | 3.97 | 1.24 | 1 | 1    | 0.00 |      |   |   |
| Q92616 | Translational activator GC               | 8.86 | 1.24 | 2 | 2 | 4.32 | 0.60 | 1 | 1    | 4.35 | 0.64 | 1 | 1 |
| Q9C0C9 | E2/E3 hybrid ubiquitin-pr                | 4.91 | 1.24 | 1 | 1 |      | 0.00 |   |      | 0.00 |      |   |   |
| Q8IZH2 | 5'-3' exoribonuclease 1 OS=Homo sap      | 0.00 |      |   |   |      | 0.00 |   | 5.01 | 1.23 | 1    | 1 |   |
| Q99700 | Ataxin-2 OS=Homo sapie                   | 3.82 | 1.22 | 1 | 1 |      | 0.00 |   |      | 0.00 |      |   |   |
| Q9Y4F4 | Protein FAM179B OS=Ho                    | 4.97 | 1.22 | 1 | 1 |      | 0.00 |   |      | 0.00 |      |   |   |
| O60271 | C-Jun-amino-terminal kin                 | 3.89 | 1.21 | 1 | 1 |      | 0.00 |   |      | 0.00 |      |   |   |
| O60486 | Plexin-C1 OS=Homo sapi                   | 3.88 | 1.21 | 1 | 1 |      | 0.00 |   |      | 0.00 |      |   |   |
| Q08378 | Golgin subfamily A memb                  | 4.51 | 1.20 | 1 | 1 |      | 0.00 |   |      | 0.00 |      |   |   |
| Q8TEQ6 | Gem-associated protein 5                 | 3.99 | 1.19 | 1 | 1 | 4.02 | 1.19 | 1 | 1    | 4.59 | 1.19 | 1 | 1 |
| Q10570 | Cleavage and polyadenyl                  | 4.50 | 1.18 | 1 | 1 |      | 0.00 |   |      | 0.00 |      |   |   |
| Q9UM54 | Unconventional myosin-V                  | 4.72 | 1.16 | 1 | 1 |      | 0.00 |   |      | 0.00 |      |   |   |
| P12107 | Collagen alpha-1(XI) chain OS=Homo       | 0.00 |      |   |   | 8.24 | 1.16 | 1 | 2    | 0.00 |      |   |   |
| P46379 | Large proline-rich protein BAG6 OS=H     | 0.00 |      |   |   |      | 0.00 |   | 4.55 | 1.15 | 1    | 1 |   |
| P41229 | Lysine-specific demethyla                | 3.85 | 1.15 | 1 | 1 |      | 0.00 |   |      | 0.00 |      |   |   |
| O60313 | Dynamamin-like 120 kDa protein, mitoch   | 0.00 |      |   |   | 3.98 | 1.15 | 1 | 1    | 0.00 |      |   |   |
| O60841 | Eukaryotic translation initiation factor | 0.00 |      |   |   |      | 0.00 |   | 9.48 | 1.15 | 1    | 2 |   |
| P25940 | Collagen alpha-3(V) chain OS=Homo s      | 0.00 |      |   |   | 4.03 | 1.15 | 1 | 1    | 0.00 |      |   |   |
| Q15648 | Mediator of RNA polymer                  | 4.10 | 1.14 | 1 | 1 |      | 0.00 |   |      | 0.00 |      |   |   |
| Q9Y4C1 | Lysine-specific demethyla                | 3.81 | 1.14 | 1 | 1 |      | 0.00 |   |      | 0.00 |      |   |   |

|        |                                         |      |      |   |   |      |      |   |   |      |      |   |   |
|--------|-----------------------------------------|------|------|---|---|------|------|---|---|------|------|---|---|
| Q7L576 | Cytoplasmic FMR1-interac                | 3.93 | 1.12 | 1 | 1 |      | 0.00 |   |   |      | 0.00 |   |   |
| Q9C0I4 | Thrombospondin type-1 c                 | 3.83 | 1.12 | 1 | 1 |      | 0.00 |   |   |      | 0.00 |   |   |
| P26358 | DNA (cytosine-5)-methyl                 | 4.56 | 1.11 | 1 | 1 |      | 0.00 |   |   |      | 0.00 |   |   |
| Q8WWZ4 | ATP-binding cassette sub-family A me    |      | 0.00 |   |   |      | 0.00 |   |   | 4.14 | 1.10 | 1 | 1 |
| Q8IZD2 | Histone-lysine N-methyltransferase 2E   |      | 0.00 |   |   |      | 0.00 |   |   | 5.08 | 1.08 | 1 | 1 |
| Q63HN8 | E3 ubiquitin-protein ligase             | 6.25 | 0.42 | 1 | 1 | 8.61 | 0.61 | 2 | 2 | 4.68 | 0.33 | 1 | 1 |
| Q9NSI6 | Bromodomain and WD re                   | 4.80 | 1.03 | 1 | 1 |      | 0.00 |   |   | 4.97 | 1.03 | 1 | 1 |
| Q7Z4S6 | Kinesin-like protein KIF21A OS=Homo     |      | 0.00 |   |   | 4.46 | 1.02 | 1 | 1 |      | 0.00 |   |   |
| Q5VU43 | Myomegalin OS=Homo sa                   | 4.83 | 1.02 | 1 | 1 |      | 0.00 |   |   |      | 0.00 |   |   |
| A6NMZ7 | Collagen alpha-6(VI) chai               | 4.29 | 1.02 | 1 | 1 |      | 0.00 |   |   |      | 0.00 |   |   |
| Q99250 | Sodium channel protein type 2 subuni    |      | 0.00 |   |   |      | 0.00 |   |   | 4.15 | 1.00 | 1 | 1 |
| Q9P260 | LisH domain and HEAT repeat-contain     |      | 0.00 |   |   |      | 0.00 |   |   | 4.18 | 0.99 | 1 | 1 |
| Q8WWQ0 | PH-interacting protein OS               | 4.90 | 0.99 | 1 | 1 |      | 0.00 |   |   | 4.52 | 0.99 | 1 | 1 |
| O15031 | Plexin-B2 OS=Homo sapi                  | 4.42 | 0.98 | 1 | 1 |      | 0.00 |   |   |      | 0.00 |   |   |
| Q9P1Z9 | Coiled-coil domain-contai               | 4.00 | 0.91 | 1 | 1 |      | 0.00 |   |   |      | 0.00 |   |   |
| Q9H583 | HEAT repeat-containing p                | 4.20 | 0.89 | 1 | 1 |      | 0.00 |   |   |      | 0.00 |   |   |
| P49792 | E3 SUMO-protein ligase F                | 3.84 | 0.40 | 1 | 1 |      | 0.00 |   |   | 4.33 | 0.47 | 1 | 1 |
| Q7Z6E9 | E3 ubiquitin-protein ligase             | 3.85 | 0.84 | 1 | 1 |      | 0.00 |   |   |      | 0.00 |   |   |
| O75165 | DnaJ homolog subfamily C member 1.      |      | 0.00 |   |   |      | 0.00 |   |   | 4.37 | 0.80 | 1 | 1 |
| Q8IWZ3 | Ankyrin repeat and KH domain-contain    |      | 0.00 |   |   |      | 0.00 |   |   | 9.16 | 0.79 | 1 | 2 |
| P42694 | Probable helicase with zir              | 3.83 | 0.77 | 1 | 1 |      | 0.00 |   |   |      | 0.00 |   |   |
| P12259 | Coagulation factor V OS=                | 5.51 | 0.76 | 1 | 1 | 5.38 | 0.76 | 1 | 1 |      | 0.00 |   |   |
| Q4AC94 | C2 domain-containing protein 3 OS=H     |      | 0.00 |   |   | 3.94 | 0.76 | 1 | 1 |      | 0.00 |   |   |
| Q8TEM1 | Nuclear pore membrane p                 | 4.12 | 0.74 | 1 | 1 |      | 0.00 |   |   |      | 0.00 |   |   |
| Q15154 | Pericentriolar material 1 protein OS=H  |      | 0.00 |   |   | 4.00 | 0.74 | 1 | 1 |      | 0.00 |   |   |
| Q96L96 | Alpha-protein kinase 3 OS               | 3.92 | 0.73 | 1 | 1 |      | 0.00 |   |   |      | 0.00 |   |   |
| P49750 | YLP motif-containing protein 1 OS=Hc    |      | 0.00 |   |   |      | 0.00 |   |   | 4.25 | 0.72 | 1 | 1 |
| P42345 | Serine/threonine-protein                | 4.27 | 0.71 | 1 | 1 |      | 0.00 |   |   |      | 0.00 |   |   |
| Q9UQ35 | Serine/arginine repetitive matrix prote |      | 0.00 |   |   |      | 0.00 |   |   | 4.63 | 0.65 | 1 | 1 |
| Q9NYQ7 | Cadherin EGF LAG seven-pass G-type      |      | 0.00 |   |   |      | 0.00 |   |   | 4.66 | 0.63 | 1 | 1 |
| O60229 | Kalirin OS=Homo sapiens GN=KALRN        |      | 0.00 |   |   | 3.93 | 0.60 | 1 | 1 |      | 0.00 |   |   |
| Q9NZJ4 | Sacsin OS=Homo sapiens                  | 5.37 | 0.59 | 1 | 1 |      | 0.00 |   |   |      | 0.00 |   |   |
| Q12955 | Ankyrin-3 OS=Homo sapiens GN=ANK        |      | 0.00 |   |   |      | 0.00 |   |   | 5.31 | 0.59 | 1 | 1 |
| P27708 | CAD protein OS=Homo sa                  | 4.04 | 0.58 | 1 | 1 |      | 0.00 |   |   |      | 0.00 |   |   |
| P18583 | Protein SON OS=Homo sapiens GN=S        |      | 0.00 |   |   | 4.23 | 0.58 | 1 | 1 |      | 0.00 |   |   |
| Q14789 | Golgin subfamily B memb                 | 5.44 | 0.55 | 1 | 1 |      | 0.00 |   |   |      | 0.00 |   |   |
| A2VEC9 | SCO-spondin OS=Homo s                   | 4.90 | 0.52 | 1 | 1 |      | 0.00 |   |   |      | 0.00 |   |   |
| Q96DT5 | Dynein heavy chain 11, axonemal OS=     |      | 0.00 |   |   | 4.73 | 0.49 | 1 | 1 |      | 0.00 |   |   |
| P13611 | Versican core protein OS=               | 4.07 | 0.47 | 1 | 1 |      | 0.00 |   |   |      | 0.00 |   |   |

|        |                                        |      |      |   |   |      |      |   |   |  |      |  |  |
|--------|----------------------------------------|------|------|---|---|------|------|---|---|--|------|--|--|
| A5YKK6 | CCR4-NOT transcription c               | 3.90 | 0.42 | 1 | 1 |      | 0.00 |   |   |  | 0.00 |  |  |
| Q07954 | Prolow-density lipoprotein receptor-re | 0.00 |      |   |   | 4.04 | 0.37 | 1 | 1 |  | 0.00 |  |  |
| Q9UPN3 | Microtubule-actin cross-li             | 3.83 | 0.22 | 1 | 1 |      | 0.00 |   |   |  | 0.00 |  |  |
| Q8WZ42 | Titin OS=Homo sapiens C                | 3.89 | 0.06 | 1 | 1 |      | 0.00 |   |   |  | 0.00 |  |  |

3031

2454

2769
