# Supplementary material for: Microfluidic reactors for advancing the MS analysis of fast biological responses
Source: PubMed Central journal article supplement (PMC6369226; doi:10.1038/s41378-019-0048-3), 2019-02-11
Supplement: 41378_2019_48_MOESM5_ESM.pdf [file 41378_2019_48_MOESM5_ESM.pdf]

| ID     | Protein description                                     | # AAs | # PSM A      | # PSM B      | # PSM C      | # Average | RSD, % | Type of control        |
|--------|---------------------------------------------------------|-------|--------------|--------------|--------------|-----------|--------|------------------------|
|        |                                                         |       | (normalized) | (normalized) | (normalized) |           |        |                        |
| P60709 | Actin B Homo sapiens                                    | 375   | 21           | 15           | 29           | 21.7      | 32.4   | Endogenous control     |
| P04406 | Glyceraldehyde-3-phosphate dehydrogenase (GAPDH) - Homo | 335   | 50           | 40           | 47           | 45.7      | 11.2   | Endogenous control     |
| P07437 | Tubulin beta chain (TBB5) - Homo sapiens                | 444   | 8            | 8            | 8            | 8.0       | 0.0    | Endogenous control     |
| P14618 | Pyruvate kinase PKM - Homo sapiens                      | 531   | 15           | 10           | 14           | 13.0      | 20.4   | Endogenous control     |
| P19338 | Nucleolin - Homo sapiens                                | 710   | 8            | 9            | 7            | 8.0       | 12.5   | Endogenous control     |
| P01966 | Hemoglobin subunit alpha - Bos taurus                   | 141   | 6            | 8            | 9            | 7.7       | 19.9   | Standard protein spike |
| P00921 | Carbonic anhydrase 2 - Bos taurus                       | 259   | 15           | 16           | 11           | 14.0      | 18.9   | Standard protein spike |
| P02070 | Hemoglobin subunit beta - Bos taurus                    | 145   | 21           | 27           | 25           | 24.3      | 12.6   | Standard protein spike |
| P02662 | Alpha-S1-casein - Bos taurus                            | 214   | 13           | 10           | 7            | 10.0      | 30.0   | Standard protein spike |
| P02666 | Beta-casein - Bos taurus                                | 224   | 4            | 6            | 4            | 4.7       | 24.7   | Standard protein spike |
| P12763 | Alpha-2-HS-glycoprotein - Bos taurus                    | 359   | 93           | 123          | 112          | 109.3     | 13.9   | Standard protein spike |
| P14618 | Pyruvate kinase PKM (GADFLVTEVENGGSLGSK)                | 18    | 44           | 35           | 49           | 42.7      | 16.6   | Peptide spike          |
| P14618 | Pyruvate kinase PKM (LAPITSDPTEATAVGAVEASFK)            | 22    | 69           | 64           | 68           | 67.0      | 3.9    | Peptide spike          |
